# Supplementary material
Source: PubMed Central journal article supplement (PMC4675673)
Supplement: NIHMS725822-supplement-3.pdf [file NIHMS725822-supplement-3.pdf]

## Supplementary Table 1

| Mouse Strain                                              | Reporter | Gene/Promote   | Gene/Promoter                                       | Available    |
|-----------------------------------------------------------|----------|----------------|-----------------------------------------------------|--------------|
| B6;CBA-Tg(Acrv1-EGFP)2727Redd/J                           | EGFP     | <i>Acrv1</i>   | acrosomal vesicle protein 1 (mouse)                 | Jackson Labs |
| STOCK Tg(CAG-Bgeo/GFP)21Lbe/J                             | EGFP     | <i>ACTB</i>    | Actin, beta (chicken)                               | Jackson Labs |
| B6.129(Cg)-Tg(CAG-Bgeo/GFP)21Lbe/J                        | EGFP     | <i>ACTB</i>    | Actin, beta (chicken)                               | Jackson Labs |
| STOCK Tg(HIST1H2BB/EGFP)1Pa/J                             | EGFP     | <i>ACTB</i>    | Actin, beta (chicken)                               | Jackson Labs |
| B6.Cg-Tg(HIST1H2BB/EGFP)1Pa/J                             | EGFP     | <i>ACTB</i>    | Actin, beta (chicken)                               | Jackson Labs |
| C57BL/6-Tg(CAG-EGFP)131Osb/LeySopJ                        | EGFP     | <i>ACTB</i>    | Actin, beta (chicken)                               | Jackson Labs |
| STOCK Tg(CAG-Bgeo,-NOTCH1,-EGFP)1Lbe/J                    | EGFP     | <i>ACTB</i>    | Actin, beta (chicken)                               | Jackson Labs |
| STOCK Tg(CAG-Bgeo,-TEL/AML1,-EGFP)A6Lbe/J                 | EGFP     | <i>ACTB</i>    | Actin, beta (chicken)                               | Jackson Labs |
| B6.Cg-Tg(CAG-Ub*G76V/GFP)1Dant/J                          | EGFP     | <i>ACTB</i>    | Actin, beta (chicken)                               | Jackson Labs |
| B6.Cg-Tg(CAG-Ub*G76V/GFP)2Dant/J                          | EGFP     | <i>ACTB</i>    | Actin, beta (chicken)                               | Jackson Labs |
| CB6-Tg(CAG-EGFP/CETN2)3-4Jgg/J                            | EGFP     | <i>ACTB</i>    | Actin, beta (chicken)                               | Jackson Labs |
| B6;C3-Tg(CAG-DsRed,-EGFP)5Gae/J                           | EGFP     | <i>ACTB</i>    | Actin, beta (chicken)                               | Jackson Labs |
| B6.FVB-Tg(CAG-EGFP,-ALPP)2.8Ggc/J                         | EGFP     | <i>ACTB</i>    | Actin, beta (chicken)                               | Jackson Labs |
| STOCK lis2tm1(ACTB-EGFP,-tdTomato)Luo/J                   | EGFP     | <i>ACTB</i>    | Actin, beta (chicken)                               | Jackson Labs |
| STOCK lis2tm2(ACTB-tdTomato,-EGFP)Luo/J                   | EGFP     | <i>ACTB</i>    | Actin, beta (chicken)                               | Jackson Labs |
| STOCK lis2tm2(ACTB-tdTomato,-EGFP)LuoTrp53tm1Tyj Nf1tm1P  | EGFP     | <i>ACTB</i>    | Actin, beta (chicken)                               | Jackson Labs |
| B6.129(FVB)-Alcamtm1Jawej/J                               | EGFP     | <i>Alcam</i>   | activated leukocyte cell adhesion molecule (mouse)  | Jackson Labs |
| STOCK Asc1tm1ReedJ/J                                      | EGFP     | <i>Asc1</i>    | achaete-scute complex homolog 1 (Drosophila) (m     | Jackson Labs |
| B6.129S-Atoh1tm4.1Hzo/J                                   | EGFP     | <i>Atoh1</i>   | atonal homolog 1 (Drosophila) (mouse)               | Jackson Labs |
| BKa.Cg-Ptprcb Bmi1tm1llw Thy1a/J                          | EGFP     | <i>Bmi1</i>    | Bmi1 polycomb ring finger oncogene (mouse)          | Jackson Labs |
| STOCK Tg(Cp-EGFP)25Gaia/J                                 | EGFP     | <i>CBF1</i>    | C promoter (Cp) binding factor 1 (CBF1)             | Jackson Labs |
| STOCK Tg(Cp-EGFP)25Gaia/ReyaJ                             | EGFP     | <i>CBF1</i>    | C promoter (Cp) binding factor 1 (CBF1)             | Jackson Labs |
| B6.129S6-Ccr6tm1(EGFP)lrw/J                               | EGFP     | <i>Ccr6</i>    | chemokine (C-C motif) receptor 6 (mouse)            | Jackson Labs |
| B6.129S2-Cd207tm2Mal/J                                    | EGFP     | <i>Cd207</i>   | CD207 antigen (mouse)                               | Jackson Labs |
| B6.129S2-Cd207tm3Mal/J                                    | EGFP     | <i>Cd207</i>   | CD207 antigen (mouse)                               | Jackson Labs |
| Strain Name: NOD/ShiLT-Tg(Cd4-EGFP)1Lt/J                  | EGFP     | <i>Cd4</i>     | Cd4 molecule (rat)                                  | Jackson Labs |
| Strain Name: B6.NOD-Tg(Cd4-EGFP)1Lt/J                     | EGFP     | <i>Cd4</i>     | Cd4 molecule (rat)                                  | Jackson Labs |
| STOCK Cdx2tm1Yxz/J                                        | EGFP     | <i>Cdx2</i>    | caudal type homeobox 2 (mouse)                      | Jackson Labs |
| B6.Cg-Tg(RP23-268L19-EGFP)2Mik/J                          | EGFP     | <i>Chat</i>    | choline acetyltransferase (mouse)                   | Jackson Labs |
| FVB-Tg(CAG-luc,-GFP)L2G85Chco/J                           | EGFP     | <i>CMV</i>     | cytomegalovirus (human)                             | Jackson Labs |
| Strain Name: NOD.FVB-Tg(CAG-luc,-GFP)L2G85Chco/FathJ      | EGFP     | <i>CMV</i>     | cytomegalovirus (human)                             | Jackson Labs |
| Strain Name: C.FVB-Tg(CAG-luc,-GFP)L2G85Chco/FathJ        | EGFP     | <i>CMV</i>     | cytomegalovirus (human)                             | Jackson Labs |
| Strain Name: D1.FVB(Cg)-Tg(CAG-luc,-GFP)L2G85Chco/FathJ   | EGFP     | <i>CMV</i>     | cytomegalovirus (human)                             | Jackson Labs |
| B6.FVB-Tg(CAG-boNT/B,-EGFP)U75-56Fwp/J                    | EGFP     | <i>CMV</i>     | cytomegalovirus (human)                             | Jackson Labs |
| FVB/N-Tg(CAG-EGFP,TGFB1*)C8Akul/J                         | EGFP     | <i>CMV</i>     | cytomegalovirus (human)                             | Jackson Labs |
| STOCK Tg(CMV-GFP,-BBS4)4T25vcs/J                          | EGFP     | <i>CMV</i>     | cytomegalovirus (human)                             | Jackson Labs |
| B6.FVB-Tg(Cnp-EGFP/Rp10a)JD368Htz/J                       | EGFP     | <i>Cnp</i>     | 2'3'-cyclic nucleotide 3' phosphodiesterase (mouse) | Jackson Labs |
| B6.Cg-Tg(Col1a1*2.3-GFP)1Rowe/J                           | EGFP     | <i>Col1a1</i>  | collagen type I alpha I (mouse)                     | Jackson Labs |
| B6;129S4-Gt(ROSA)26Sortm1(rtTA*2)JaeCol1a1tm7(tetO-HIST   | EGFP     | <i>Col1a1</i>  | collagen type I alpha I (mouse)                     | Jackson Labs |
| B6;129S7-Crim1tm1(GFP/cre/ERT2)Pzg/J                      | EGFP     | <i>Crim1</i>   | cysteine rich transmembrane BMP regulator 1 (chc    | Jackson Labs |
| C57BL/6-Tg(Csf1r-EGFP-NGFR/FKBP1A/TNFRSF6)2Bck/J          | EGFP     | <i>Csf1r</i>   | colony stimulating factor 1 receptor (mouse)        | Jackson Labs |
| B6.129P-Cx3cr1tm1Litt/J                                   | EGFP     | <i>Cx3cr1</i>  | chemokine (C-X3-C) receptor 1 (mouse)               | Jackson Labs |
| B6.129P(Cg)-Ptprca Cx3cr1tm1Litt/Litt/J                   | EGFP     | <i>Cx3cr1</i>  | chemokine (C-X3-C) receptor 1 (mouse)               | Jackson Labs |
| B6.129P2-Cxcr6tm1Litt/J                                   | EGFP     | <i>Cxcr6</i>   | chemokine (C-X-C motif) receptor 6 (mouse)          | Jackson Labs |
| C.129P2-Cxcr6tm1Litt/J                                    | EGFP     | <i>Cxcr6</i>   | chemokine (C-X-C motif) receptor 6 (mouse)          | Jackson Labs |
| C57BL/6-Cxcr7tm1Litt/J                                    | EGFP     | <i>Cxcr7</i>   | chemokine (C-X-C motif) receptor 7 (mouse)          | Jackson Labs |
| B6;129P-Cyp11a1tm1(GFP/cre)Pzg/J                          | EGFP     | <i>Cyp11a1</i> | cytochrome P450 family 11                           | Jackson Labs |
| B6SjL-Tg(Dazl-hrGFP)4Gar/J                                | EGFP     | <i>Dazl</i>    | deleted in azoospermia-like (mouse)                 | Jackson Labs |
| FVB/N-Tg(Dazl-EGFP)10Rarp/J                               | EGFP     | <i>Dazl</i>    | deleted in azoospermia-like (mouse)                 | Jackson Labs |
| Strain Name: B6.129P2(Cg)-Hprt1m13(Ple54-EGFP)Ems/Mmjax   | EGFP     | <i>DCX</i>     | doublecortin (human)                                | Jackson Labs |
| Strain Name: B6.129P2(Cg)-Hprt1m20(Ple53-EGFP)Ems/Mmjax   | EGFP     | <i>DCX</i>     | doublecortin (human)                                | Jackson Labs |
| C57BL/6-Tg(Dmp1-Topaz)1Ikai/J                             | EGFP     | <i>Dmp1</i>    | dentin matrix protein 1 (mouse)                     | Jackson Labs |
| STOCK Hprt1m31(Ple67-EGFP)Ems/Mmjax                       | EGFP     | <i>FEV</i>     | FEV (ETS oncogene family) (human)                   | Jackson Labs |
| STOCK Fmn1tm1Made/J                                       | EGFP     | <i>Fmn1</i>    | formin 1 (mouse)                                    | Jackson Labs |
| B6;DBA-Tg(Fos-tTA,Fos-EGFP*)1Mmay Tg(tetO-lacZ,tTA*)1Mmay | EGFP     | <i>Fos</i>     | FBJ osteosarcoma oncogene (mouse)                   | Jackson Labs |
| B6.Cg-Tg(Fos/EGFP)1-3Brth/J                               | EGFP     | <i>Fos</i>     | FBJ osteosarcoma oncogene (mouse)                   | Jackson Labs |
| B6.Cg-Tg(Fos-tTA,Fos-EGFP*)1Mmay/J                        | EGFP     | <i>Fos</i>     | FBJ osteosarcoma oncogene (mouse)                   | Jackson Labs |
| B6;129S4-Foxd1tm1(GFP/cre)Amc/J                           | EGFP     | <i>Foxd1</i>   | forkhead box D1 (mouse)                             | Jackson Labs |
| B6;129S4-Foxd1tm2(GFP/cre/ERT2)Amc/J                      | EGFP     | <i>Foxd1</i>   | forkhead box D1 (mouse)                             | Jackson Labs |
| B6;C3-Tg(FOXJ1-EGFP)85Leo/J                               | EGFP     | <i>FOXJ1</i>   | forkhead box J1 (human)                             | Jackson Labs |
| B6;129P2-Foxl2tm1(GFP/cre/ERT2)Pzg/J                      | EGFP     | <i>Foxl2</i>   | forkhead box L2 (mouse)                             | Jackson Labs |
| Strain Name: C.Cg-Foxp3tm2Tch/J                           | EGFP     | <i>Foxp3</i>   | forkhead box P3 (mouse)                             | Jackson Labs |
| Strain Name: B6.Cg-Foxp3tm2Tch/J                          | EGFP     | <i>Foxp3</i>   | forkhead box P3 (mouse)                             | Jackson Labs |
| Strain Name: NOD/ShiLT-Tg(Foxp3-EGFP/cre)1cJbs/J          | EGFP     | <i>Foxp3</i>   | forkhead box P3 (mouse)                             | Jackson Labs |
| B6.NOD-Tg(Foxp3-EGFP/cre)1aJbs/J                          | EGFP     | <i>Foxp3</i>   | forkhead box P3 (mouse)                             | Jackson Labs |
| B6N.129(Cg)-Foxp3tm3Ayr/J                                 | EGFP     | <i>Foxp3</i>   | forkhead box P3 (mouse)                             | Jackson Labs |
| STOCK Foxp3tm9(EGFP/cre/ERT2)Ayr/J                        | EGFP     | <i>Foxp3</i>   | forkhead box P3 (mouse)                             | Jackson Labs |
| FVB-Tg(GadGFP)45704Swn/J                                  | EGFP     | <i>Gad1</i>    | glutamate decarboxylase 1 (mouse)                   | Jackson Labs |
| Strain Name: STOCK Tg(Gad1-EGFP)94Agmo/J                  | EGFP     | <i>Gad1</i>    | glutamate decarboxylase 1 (mouse)                   | Jackson Labs |
| Strain Name: STOCK Tg(Gad1-EGFP)98Agmo/J                  | EGFP     | <i>Gad1</i>    | glutamate decarboxylase 1 (mouse)                   | Jackson Labs |
| B6.Cg-Tg(Gad1-EGFP)3Gfng/J                                | EGFP     | <i>Gad1</i>    | glutamate decarboxylase 1 (mouse)                   | Jackson Labs |

|                                                          |      |                                           |                                                    |              |
|----------------------------------------------------------|------|-------------------------------------------|----------------------------------------------------|--------------|
| CB6-Tg(Gad1-EGFP)G42Zjh/J                                | EGFP | <i>Gad1</i>                               | glutamate decarboxylase 1 (mouse)                  | Jackson Labs |
| FVB/N-Tg(GFAPGFP)14Mes/J                                 | EGFP | <i>GFAP</i>                               | glial fibrillary acidic protein (human)            | Jackson Labs |
| Strain Name: B6.129P2(Cg)-Hprt1m4(Ple88-EGFP)Ems/Mmjax   | EGFP | <i>GFAP</i>                               | glial fibrillary acidic protein (human)            | Jackson Labs |
| Strain Name: B6.129P2(Cg)-Hprt1m8(Ple90-EGFP)Ems/Mmjax   | EGFP | <i>GFAP</i>                               | glial fibrillary acidic protein (human)            | Jackson Labs |
| FVB/N-Tg(GFAP-Cadm1/EGFP)42Oje/J                         | EGFP | <i>GFAP</i>                               | glial fibrillary acidic protein (human)            | Jackson Labs |
| B6.Cg-Tg(Gfap-EGFP)3739Sart/J                            | EGFP | <i>Gfap</i>                               | glial fibrillary acidic protein (mouse)            | Jackson Labs |
| B6.129-Gfi1tm2Tmo/J                                      | EGFP | <i>Gfi1</i>                               | growth factor independent 1 (mouse)                | Jackson Labs |
| B6.129-Gfi1btm1Tmo/J                                     | EGFP | <i>Gfi1b</i>                              | growth factor independent 1B (mouse)               | Jackson Labs |
| B6;129P2-Gpr15tm1.1Litt/J                                | EGFP | <i>Gpr15</i>                              | G protein-coupled receptor 15 (mouse)              | Jackson Labs |
| B6.129X1-Gpr65tm1Witt/J                                  | EGFP | <i>Gpr65</i>                              | G-protein coupled receptor 65 (mouse)              | Jackson Labs |
| 129;B6-Grin3b/Tmem259tm1Zhang Tg(Pmp-C19ORF6,-GFP)6Zh    | EGFP | <i>Grin3b</i>                             | glutamate receptor inotropic NMDA3B (mouse)        | Jackson Labs |
| FVB-Tg(Gstm5-EGFP)11lis/J                                | EGFP | <i>Gstm5</i>                              | glutathione S-transferase mu 5 (mouse)             | Jackson Labs |
| B6;129-Gt(ROSA)26Sortm2Sho/J                             | EGFP | <i>Gt(ROSA)26S</i><br>or<br><i>Rosa26</i> |                                                    | Jackson Labs |
| STOCK Gt(ROSA)26Sortm1(rtTA,EGFP)Nagy/J                  | EGFP | <i>Gt(ROSA)26S</i><br>or<br><i>Rosa26</i> |                                                    | Jackson Labs |
| B6.Cg-Gt(ROSA)26Sortm1(rtTA,EGFP)Nagy/J                  | EGFP | <i>Gt(ROSA)26S</i><br>or<br><i>Rosa26</i> |                                                    | Jackson Labs |
| 129-Gt(ROSA)26Sortm3(CAG-EGFP/Dsred2)Luo/J               | EGFP | <i>Gt(ROSA)26S</i><br>or<br><i>Rosa26</i> |                                                    | Jackson Labs |
| 129-Gt(ROSA)26Sortm1(CAG-EGFP)Luo/J                      | EGFP | <i>Gt(ROSA)26S</i><br>or<br><i>Rosa26</i> |                                                    | Jackson Labs |
| 129-Gt(ROSA)26Sortm2(CAG-Dsred2/EGFP)Luo/J               | EGFP | <i>Gt(ROSA)26S</i><br>or<br><i>Rosa26</i> |                                                    | Jackson Labs |
| B6.129-Gt(ROSA)26Sortm1(CAG-EGFP)Luo/J                   | EGFP | <i>Gt(ROSA)26S</i><br>or<br><i>Rosa26</i> |                                                    | Jackson Labs |
| B6.129-Gt(ROSA)26Sortm3(CAG-EGFP/Dsred2)Luo/J            | EGFP | <i>Gt(ROSA)26S</i><br>or<br><i>Rosa26</i> |                                                    | Jackson Labs |
| B6.129-Gt(ROSA)26Sortm2(CAG-Dsred2/EGFP)Luo/J            | EGFP | <i>Gt(ROSA)26S</i><br>or<br><i>Rosa26</i> |                                                    | Jackson Labs |
| STOCK Gt(ROSA)26Sortm1(DTA)Jpmb/J                        | EGFP | <i>Gt(ROSA)26S</i><br>or<br><i>Rosa26</i> |                                                    | Jackson Labs |
| STOCK Gt(ROSA)26Sortm4(ACTB-tdTomato,-EGFP)Luo/J         | EGFP | <i>Gt(ROSA)26S</i><br>or<br><i>Rosa26</i> |                                                    | Jackson Labs |
| B6.129(Cg)-Gt(ROSA)26Sortm4(ACTB-tdTomato,-EGFP)Luo/J    | EGFP | <i>Gt(ROSA)26S</i><br>or<br><i>Rosa26</i> |                                                    | Jackson Labs |
| STOCK Tg(Gt(ROSA)26Sor-EGFP)1Able/J                      | EGFP | <i>Gt(ROSA)26S</i><br>or<br><i>Rosa26</i> |                                                    | Jackson Labs |
| B6.Cg-Tg(Gt(ROSA)26Sor-EGFP)1Able/J                      | EGFP | <i>Gt(ROSA)26S</i><br>or<br><i>Rosa26</i> |                                                    | Jackson Labs |
| CBy.Cg-Tg(Gt(ROSA)26Sor-EGFP)1Able/J                     | EGFP | <i>Gt(ROSA)26S</i><br>or<br><i>Rosa26</i> |                                                    | Jackson Labs |
| B6;129-Gt(ROSA)26Sortm1Joe/J                             | EGFP | <i>Gt(ROSA)26S</i><br>or<br><i>Rosa26</i> |                                                    | Jackson Labs |
| B6.129-Gt(ROSA)26Sortm1Joe/J                             | EGFP | <i>Gt(ROSA)26S</i><br>or<br><i>Rosa26</i> |                                                    | Jackson Labs |
| C57BL/6-Gt(ROSA)26Sortm7(Pik3ca*,EGFP)Rsky/J             | EGFP | <i>Gt(ROSA)26S</i><br>or<br><i>Rosa26</i> |                                                    | Jackson Labs |
| C57BL/6-Gt(ROSA)26Sortm8(Map2k1*,EGFP)Rsky/J             | EGFP | <i>Gt(ROSA)26S</i><br>or<br><i>Rosa26</i> |                                                    | Jackson Labs |
| C57BL/6-Gt(ROSA)26Sortm9(Rac1*,EGFP)Rsky/J               | EGFP | <i>Gt(ROSA)26S</i><br>or<br><i>Rosa26</i> |                                                    | Jackson Labs |
| FVB.Cg-Gt(ROSA)26Sortm1(CAG-lacZ,-EGFP)Glh/J             | EGFP | <i>Gt(ROSA)26S</i><br>or<br><i>Rosa26</i> |                                                    | Jackson Labs |
| B6;129S-Gt(ROSA)26Sortm35.1(CAG-aop3/GFP)Hze/J           | EGFP | <i>Gt(ROSA)26S</i><br>or<br><i>Rosa26</i> |                                                    | Jackson Labs |
| B6.129P2-Gt(ROSA)26Sortm3Nik/J                           | EGFP | <i>Gt(ROSA)26S</i><br>or<br><i>Rosa26</i> |                                                    | Jackson Labs |
| B6;129S-Gt(ROSA)26Sortm38(CAG-GCaMP3)Hze/J               | EGFP | <i>Gt(ROSA)26S</i><br>or<br><i>Rosa26</i> |                                                    | Jackson Labs |
| B6;129S4-Gt(ROSA)26Sortm1(rtTA*2)JaeCol1a1tm7(tetO-HIST  | EGFP | <i>Gt(ROSA)26S</i><br>or<br><i>Rosa26</i> |                                                    | Jackson Labs |
| STOCK Gt(ROSA)26Sortm1.1(rtTA,EGFP)NagySmn1tm1Msd Tg(    | EGFP | <i>Gt(ROSA)26S</i><br>or<br><i>Rosa26</i> |                                                    | Jackson Labs |
| STOCK Gt(ROSA)26Sortm1.1(rtTA,EGFP)NagySmn1tm1Msd Tg(    | EGFP | <i>Gt(ROSA)26S</i><br>or<br><i>Rosa26</i> |                                                    | Jackson Labs |
| STOCK Gt(ROSA)26Sortm8(ACTB-EGFP*,-tTA2)Luo/J            | EGFP | <i>Gt(ROSA)26S</i><br>or<br><i>Rosa26</i> |                                                    | Jackson Labs |
| STOCK Gt(ROSA)26Sortm6(ACTB-EGFP*,-tdTomato)Luo/J        | EGFP | <i>Gt(ROSA)26S</i><br>or<br><i>Rosa26</i> |                                                    | Jackson Labs |
| STOCK Gt(ROSA)26Sortm7(ACTB-EGFP*)Luo/J                  | EGFP | <i>Gt(ROSA)26S</i><br>or<br><i>Rosa26</i> |                                                    | Jackson Labs |
| STOCK Gt(ROSA)26Sortm2(EGFP/cre)Alj/J                    | EGFP | <i>Gt(ROSA)26S</i><br>or<br><i>Rosa26</i> |                                                    | Jackson Labs |
| B6.FVB-Tg(H2-K-S100a9,GFP)1Gabr/J                        | EGFP | <i>H2-K</i>                               | histocompatibility 2 K region (mouse)              | Jackson Labs |
| B6.129P2(129S4)-Hprt1m14(Ple103-EGFP/cre)Ems/Mmjax       | EGFP | <i>HAP1</i>                               | huntingtin-associated protein 1 (human)            | Jackson Labs |
| Strain Name: B6.129P2(Cg)-Hprt1m15(Ple111-EGFP)Ems/Mmjax | EGFP | <i>HCRT</i>                               | hypocretin (orexin) neuropeptide precursor (human) | Jackson Labs |
| STOCK Hprt1m32(Ple112-EGFP)Ems/Mmjax                     | EGFP | <i>HCRT</i>                               | hypocretin (orexin) neuropeptide precursor (human) | Jackson Labs |
| B6.129-Hoxa11tm1Dmwe/J                                   | EGFP | <i>Hoxa11</i>                             | homeobox A11 (mouse)                               | Jackson Labs |
| 129S.Cg-Tg(Hoxb7-EGFP)33Cos/J                            | EGFP | <i>Hoxb7</i>                              | homeobox B7 (mouse)                                | Jackson Labs |
| FVB/NJ-Tg(Hspa1a-luc,-EGFP)2Chco/J                       | EGFP | <i>Hspa1a</i>                             | heat shock protein 1A (mouse)                      | Jackson Labs |
| STOCK Tg(TCF/Lef1-HIST1H2BB/EGFP)61Hadji/J               | EGFP | <i>Hspa1b</i>                             | heat shock protein 1B (mouse)                      | Jackson Labs |
| B6.129X1-Id1tm1Xhsu/J                                    | EGFP | <i>Id1</i>                                | inhibitor of DNA binding 1 (mouse)                 | Jackson Labs |
| B6.129S(Cg)-Id2tm2.1Blh/Zhu/J                            | EGFP | <i>Id2</i>                                | inhibitor of DNA binding 2 (mouse)                 | Jackson Labs |

|                                                             |      |                   |                                                     |              |
|-------------------------------------------------------------|------|-------------------|-----------------------------------------------------|--------------|
| B6;129-lis1tm2(CAG-Bgeo,-Ndp,-EGFP)Nat/J                    | EGFP | <i>lis1</i>       | intergenic insertion site 1 (mouse)                 | Jackson Labs |
| B6;129-lis1tm3(CAG-Bgeo,-tdTomato/TEVP,-Dlg4,-GFP)Nat/J     | EGFP | <i>lis1</i>       | intergenic insertion site 1 (mouse)                 | Jackson Labs |
| B6.129S6-Il10tm1Flv/J                                       | EGFP | <i>Il10</i>       | interleukin 10 (mouse)                              | Jackson Labs |
| C57BL/6-Il17atm1Bcgen/J                                     | EGFP | <i>Il17a</i>      | interleukin 17A (mouse)                             | Jackson Labs |
| C.129-Il4tm1Lky/J                                           | EGFP | <i>Il4</i>        | interleukin 4 (mouse)                               | Jackson Labs |
| NOD.Cg-Il4tm1Lky/JbsJ                                       | EGFP | <i>Il4</i>        | interleukin 4 (mouse)                               | Jackson Labs |
| Strain Name: NOD/ShiLJ-Tg(Ins1-EGFP/GH1)14Hara/HaraJ        | EGFP | <i>Ins1</i>       | insulin 1 (rat)                                     | Jackson Labs |
| B6.Cg-Tg(Ins1-EGFP)1Hara/J                                  | EGFP | <i>Ins1</i>       | insulin I (mouse)                                   | Jackson Labs |
| NOD.Cg-Tg(Ins1-EGFP)1Hara/QtnG                              | EGFP | <i>Ins1</i>       | insulin I (mouse)                                   | Jackson Labs |
| C57BL/6-Tg(Ins2-luc/EGFP/TK)300Kauf/J                       | EGFP | <i>Ins2</i>       | insulin II (mouse)                                  | Jackson Labs |
| NOD.B6-Tg(Ins2-luc/EGFP/TK)300Kauf/J                        | EGFP | <i>Ins2</i>       | insulin II (mouse)                                  | Jackson Labs |
| B6.129S1-Irf4tm1Rdf/J                                       | EGFP | <i>Irf4</i>       | interferon regulatory factor 4 (mouse)              | Jackson Labs |
| B6.129S1-Is(14)2Rdf/J                                       | EGFP | <i>Is(14)2Rdf</i> | insertion Chr 14                                    | Jackson Labs |
| STOCK Tg(Isl1-EGFP*)1Slp/J                                  | EGFP | <i>Isl1</i>       | ISL1 transcription factor LIM                       | Jackson Labs |
| FVB-Tg(ITGAM-DTR/EGFP)34Lan/J                               | EGFP | <i>ITGAM</i>      | integrin alpha M                                    | Jackson Labs |
| B6.FVB-Tg(ITGAM-DTR/EGFP)34Lan/J                            | EGFP | <i>ITGAM</i>      | integrin alpha M                                    | Jackson Labs |
| Strain Name: NOD.FVB-Tg(ITGAM-DTR/EGFP)34Lan/JdkJ           | EGFP | <i>ITGAM</i>      | integrin alpha M                                    | Jackson Labs |
| B6.FVB-Tg(Itgax-DTR/EGFP)57Lan/J                            | EGFP | <i>Itgax</i>      | integrin alpha X (mouse)                            | Jackson Labs |
| C.FVB-Tg(Itgax-DTR/EGFP)57Lan/J                             | EGFP | <i>Itgax</i>      | integrin alpha X (mouse)                            | Jackson Labs |
| C57BL/6J-Tg(Itgax-cre,-EGFP)4097Ach/J                       | EGFP | <i>Itgax</i>      | integrin alpha X (mouse)                            | Jackson Labs |
| Strain Name: NOD.FVB-Tg(Itgax-DTR/EGFP)57Lan/JdkJ           | EGFP | <i>Itgax</i>      | integrin alpha X (mouse)                            | Jackson Labs |
| NOD.B6-Tg(Itgax-cre,-EGFP)4097Ach/J                         | EGFP | <i>Itgax</i>      | integrin alpha X (mouse)                            | Jackson Labs |
| FVB-Tg(JPH3-GFP,-JPH3*)GXwy/J                               | EGFP | <i>JPH3</i>       | junctophilin 3 (human)                              | Jackson Labs |
| STOCK Kdrtm2.1Jrt/J                                         | EGFP | <i>Kdr</i>        | kinase insert domain protein receptor (mouse)       | Jackson Labs |
| STOCK Kiss1tm1.1(cre/EGFP)SteI/J                            | EGFP | <i>Kiss1</i>      | KISS-1 metastasis-suppressor (mouse)                | Jackson Labs |
| B6.129S7-Kittm1Rosay/J                                      | EGFP | <i>Kit</i>        | kit oncogene (mouse)                                | Jackson Labs |
| STOCK Kitltm1.1Sjm/J                                        | EGFP | <i>Kitl</i>       | kit ligand (mouse)                                  | Jackson Labs |
| Strain Name: B6;129P-Klf3tm1(cre/ERT2)Pzg/J                 | EGFP | <i>Klf3</i>       | Kruppel-like factor 3 (basic) (mouse)               | Jackson Labs |
| B6.Cg-Tg(Krt1-15-EGFP)2Cot/J                                | EGFP | <i>Krt15</i>      | keratin 15 (mouse)                                  | Jackson Labs |
| B6.129P2-Lgr5tm1(cre/ERT2)Cle/J                             | EGFP | <i>Lgr5</i>       | leucine rich repeat containing G protein coupled re | Jackson Labs |
| B6.129P2-Lgr6tm2.1(cre/ERT2)Cle/J                           | EGFP | <i>Lgr6</i>       | leucine-rich repeat-containing G protein-coupled re | Jackson Labs |
| B6.Cg-Tg(Ly6a-EGFP)G5Dzk/J                                  | EGFP | <i>Ly6a</i>       | lymphocyte antigen 6 complex locus A (mouse)        | Jackson Labs |
| B6;129P2-Lyve1tm1.1(EGFP/cre)Cys/J                          | EGFP | <i>Lyve1</i>      | lymphatic vessel endothelial hyaluronan receptor 1  | Jackson Labs |
| Strain Name: STOCK Maptm1(EGFP)KitTg(MAPT)8cPdav/J          | EGFP | <i>MAPT</i>       | microtubule-associated protein tau (human)          | Jackson Labs |
| Strain Name: B6.Cg-Maptm1(EGFP)KitTg(MAPT)8cPdav/J          | EGFP | <i>MAPT</i>       | microtubule-associated protein tau (human)          | Jackson Labs |
| STOCK Maptm1(EGFP)Kit/J                                     | EGFP | <i>Mapt</i>       | microtubule-associated protein tau (mouse)          | Jackson Labs |
| Strain Name: STOCK Maptm1(EGFP)KitTg(MAPT)8cPdav/J          | EGFP | <i>Mapt</i>       | microtubule-associated protein tau (mouse)          | Jackson Labs |
| Strain Name: B6.Cg-Maptm1(EGFP)KitTg(MAPT)8cPdav/J          | EGFP | <i>Mapt</i>       | microtubule-associated protein tau (mouse)          | Jackson Labs |
| B6.Cg-Tg(Mc4r-MAPT/Sapphire)21Rck/J                         | EGFP | <i>Mc4r</i>       | melanocortin 4 receptor (mouse)                     | Jackson Labs |
| 129-Mcm2tm2Scpr/J                                           | EGFP | <i>Mcm2</i>       | minichromosome maintenance deficient 2 mitotin (:   | Jackson Labs |
| B6.Cg-Tg(Hlxb9-GFP)1Tmj/J                                   | EGFP | <i>Mnx1</i>       | motor neuron and pancreas homeobox 1 (mouse)        | Jackson Labs |
| STOCK Smn1tm1Msd Tg(Hlxb9-GFP)1Tmj Tg(SMN2)89Ahmb/J         | EGFP | <i>Mnx1</i>       | motor neuron and pancreas homeobox 1 (mouse)        | Jackson Labs |
| B6.Cg-Tg(Myh11-cre,-EGFP)2Mik/J                             | EGFP | <i>Myh11</i>      | myosin heavy polypeptide 11 smooth muscle (mou      | Jackson Labs |
| STOCK Tg(Myh6*tetO-GCaMP2)1Mik/J                            | EGFP | <i>Myh6</i>       | myosin heavy polypeptide 6 cardiac muscle alpha     | Jackson Labs |
| 129S;B6-Nanogtm1Hoch/J                                      | EGFP | <i>Nanog</i>      | Nanog homeobox (mouse)                              | Jackson Labs |
| STOCK lis2tm2(ACTB-tdTomato,-EGFP)LuoTrp53tm1Tjy Nf1tm1P    | EGFP | <i>Nf1</i>        | neurofibromatosis 1 (mouse)                         | Jackson Labs |
| STOCK Nphs1tm1Rkl/J                                         | EGFP | <i>Nphs1</i>      | nephrosis 1 homolog nephrin                         | Jackson Labs |
| B6.FVB-Tg(Npy-hrGFP)1Low/J                                  | EGFP | <i>Npy</i>        | neuropeptide Y (mouse)                              | Jackson Labs |
| C57BL/6-Tg(Nr4a1-EGFP/cre)820Khog/J                         | EGFP | <i>Nr4a1</i>      | nuclear receptor subfamily 4 group A membrane 1     | Jackson Labs |
| B6;129P2-Olfr124tm1Mom/MomJ                                 | EGFP | <i>Olfr124</i>    | olfactory receptor 124 (mouse)                      | Jackson Labs |
| Strain Name: STOCK Olfr151tm10Mom/MomJ                      | EGFP | <i>Olfr151</i>    | olfactory receptor 151 (mouse)                      | Jackson Labs |
| Strain Name: STOCK Olfr151tm9Mom/MomJ                       | EGFP | <i>Olfr151</i>    | olfactory receptor 151 (mouse)                      | Jackson Labs |
| Strain Name: STOCK Olfr151tm8Mom/MomJ                       | EGFP | <i>Olfr151</i>    | olfactory receptor 151 (mouse)                      | Jackson Labs |
| Strain Name: STOCK Olfr151tm7Mom/MomJ                       | EGFP | <i>Olfr151</i>    | olfactory receptor 151 (mouse)                      | Jackson Labs |
| Strain Name: STOCK Olfr151tm6Mom/MomJ                       | EGFP | <i>Olfr151</i>    | olfactory receptor 151 (mouse)                      | Jackson Labs |
| Strain Name: STOCK Olfr151tm4Mom/MomJ                       | EGFP | <i>Olfr151</i>    | olfactory receptor 151 (mouse)                      | Jackson Labs |
| Strain Name: STOCKOlfr151tm11(Olfr160)Mom/MomJ              | EGFP | <i>Olfr151</i>    | olfactory receptor 151 (mouse)                      | Jackson Labs |
| Strain Name: B6;129P2-Olfr151tm13(r17)Mom/MomJ              | EGFP | <i>Olfr151</i>    | olfactory receptor 151 (mouse)                      | Jackson Labs |
| Strain Name: B6;129P2-Olfr151tm24(Olfr2)Mom/MomJ            | EGFP | <i>Olfr151</i>    | olfactory receptor 151 (mouse)                      | Jackson Labs |
| Strain Name: B6;129P2-Olfr151tm26Mom/MomJ                   | EGFP | <i>Olfr151</i>    | olfactory receptor 151 (mouse)                      | Jackson Labs |
| Strain Name: STOCKOlfr151tm16(Olfr160/Olfr161)Mom/MomJ      | EGFP | <i>Olfr151</i>    | olfactory receptor 151 (mouse)                      | Jackson Labs |
| Strain Name: STOCK Olfr160tm1(Olfr151)MomTg(Olfr151,taulacZ | EGFP | <i>Olfr151</i>    | olfactory receptor 151 (mouse)                      | Jackson Labs |
| Strain Name: STOCK Olfr160tm1(Olfr151)MomTg(Olfr151,taulacZ | EGFP | <i>Olfr151</i>    | olfactory receptor 151 (mouse)                      | Jackson Labs |
| B6;CBA-Tg(Hf/Olfr16-GFP)7Mom/MomJ                           | EGFP | <i>Olfr16</i>     | olfactory receptor 16 (mouse)                       | Jackson Labs |
| B6;CBA-Tg(Hf/Olfr16-GFP)47Mom/MomJ                          | EGFP | <i>Olfr16</i>     | olfactory receptor 16 (mouse)                       | Jackson Labs |
| B6;CBA-Tg(H/Olfr16-GFP)3Mom/MomJ                            | EGFP | <i>Olfr16</i>     | olfactory receptor 16 (mouse)                       | Jackson Labs |
| B6;CBA-Tg(H/Olfr16-GFP)4Mom/MomJ                            | EGFP | <i>Olfr16</i>     | olfactory receptor 16 (mouse)                       | Jackson Labs |
| B6;CBA-Tg(H/Olfr16-GFP)6Mom/MomJ                            | EGFP | <i>Olfr16</i>     | olfactory receptor 16 (mouse)                       | Jackson Labs |
| B6;CBA-Tg(H/Olfr16-taumRFP,-tauGFP)8Mom/MomJ                | EGFP | <i>Olfr16</i>     | olfactory receptor 16 (mouse)                       | Jackson Labs |
| B6;CBA-Tg(H/Olfr16-taumRFP,-tauGFP)9Mom/MomJ                | EGFP | <i>Olfr16</i>     | olfactory receptor 16 (mouse)                       | Jackson Labs |
| Strain Name: B6;CBA-Tg(H/Olfr16-taumCherry,-tauGFP)11Mom/I  | EGFP | <i>Olfr16</i>     | olfactory receptor 16 (mouse)                       | Jackson Labs |
| Strain Name: B6;CBA-Tg(H/Olfr16-taumCherry,-tauGFP)13Mom/I  | EGFP | <i>Olfr16</i>     | olfactory receptor 16 (mouse)                       | Jackson Labs |
| B6;CBA-Tg(H*/Olfr16-GFP)11Mom/MomJ                          | EGFP | <i>Olfr16</i>     | olfactory receptor 16 (mouse)                       | Jackson Labs |
| B6;CBA-Tg(H*/Olfr16-GFP)25Mom/MomJ                          | EGFP | <i>Olfr16</i>     | olfactory receptor 16 (mouse)                       | Jackson Labs |

|                                                                  |      |                |                                                                     |              |
|------------------------------------------------------------------|------|----------------|---------------------------------------------------------------------|--------------|
| Strain Name: STOCKOlfr160tm5(Cnga2)Mom/MomJ                      | EGFP | <i>Olfr160</i> | olfactory receptor 160 (mouse)                                      | Jackson Labs |
| Strain Name: STOCKOlfr160tm1(Olfr151)Mom/MomJ                    | EGFP | <i>Olfr160</i> | olfactory receptor 160 (mouse)                                      | Jackson Labs |
| Strain Name: STOCK Olfr160tm6Mom/MomJ                            | EGFP | <i>Olfr160</i> | olfactory receptor 160 (mouse)                                      | Jackson Labs |
| B6;129P2-Olfr160tm11(Olfr545)Mom/MomJ                            | EGFP | <i>Olfr160</i> | olfactory receptor 160 (mouse)                                      | Jackson Labs |
| Strain Name: STOCK Olfr160tm1(Olfr151)MomTg(Olfr151,taulacZ EGFP | EGFP | <i>Olfr160</i> | olfactory receptor 160 (mouse)                                      | Jackson Labs |
| Strain Name: STOCK Olfr160tm1(Olfr151)MomTg(Olfr151,taulacZ EGFP | EGFP | <i>Olfr160</i> | olfactory receptor 160 (mouse)                                      | Jackson Labs |
| Strain Name: B6.129P2(Cg)-Olfr160tm6Mom/MomJ                     | EGFP | <i>Olfr160</i> | olfactory receptor 160 (mouse)                                      | Jackson Labs |
| Strain Name: B6;129P2-Olfr17tm5(Olfr6)Mom/MomJ                   | EGFP | <i>Olfr17</i>  | olfactory receptor 17 (mouse)                                       | Jackson Labs |
| Strain Name: STOCK Olfr17tm6(Olfr713)Mom/MomJ                    | EGFP | <i>Olfr17</i>  | olfactory receptor 17 (mouse)                                       | Jackson Labs |
| Strain Name: STOCK Olfr17tm7Mom/MomJ                             | EGFP | <i>Olfr17</i>  | olfactory receptor 17 (mouse)                                       | Jackson Labs |
| B6;129P2-Olfr545tm1Mom/MomJ                                      | EGFP | <i>Olfr545</i> | olfactory receptor 545 (mouse)                                      | Jackson Labs |
| B6;129P2-Olfr545tm2Mom/MomJ                                      | EGFP | <i>Olfr545</i> | olfactory receptor 545 (mouse)                                      | Jackson Labs |
| B6;129P2-Olfr545tm3(Olfr160)Mom/MomJ                             | EGFP | <i>Olfr545</i> | olfactory receptor 545 (mouse)                                      | Jackson Labs |
| B6;129P2-Olfr545tm4Mom/MomJ                                      | EGFP | <i>Olfr545</i> | olfactory receptor 545 (mouse)                                      | Jackson Labs |
| Strain Name: B6.129P2(Cg)-Hprt8m(Ple151-EGFP)Ems/Mmjax           | EGFP | <i>OLIG1</i>   | oligodendrocyte transcription factor 1 (human)                      | Jackson Labs |
| Strain Name: B6;129P2-Omp2m(spH)Mom/J                            | EGFP | <i>Omp</i>     | olfactory marker protein (mouse)                                    | Jackson Labs |
| Strain Name: B6;129P2-Omp3mMom/MomJ                              | EGFP | <i>Omp</i>     | olfactory marker protein (mouse)                                    | Jackson Labs |
| STOCK Osr1tm1(EGFP/cre/ERT2)Amc/J                                | EGFP | <i>Osr1</i>    | odd-skipped related 1 (Drosophila) (mouse)                          | Jackson Labs |
| B6;SJL-Tg(Oxt/EGFP)Al03Wsy/J                                     | EGFP | <i>Oxt</i>     | oxytocin (mouse)                                                    | Jackson Labs |
| B6;CB-Tg(Pbsn-Hpn,-GFP)DVv/J                                     | EGFP | <i>Pbsn</i>    | probasin (rat)                                                      | Jackson Labs |
| B6.129S7-Pcdhgtm2Xzw/J                                           | EGFP | <i>Pcdhg</i>   | protocadherin gamma cluster (mouse)                                 | Jackson Labs |
| B6;FVB-Tg(Pcp2-EGFP)2Yuza/J                                      | EGFP | <i>Pcp2</i>    | Purkinje cell protein 2 (L7) (mouse)                                | Jackson Labs |
| B6.129S4-Pdgfratm11(EGFP)Sor/J                                   | EGFP | <i>Pdgfra</i>  | platelet derived growth factor receptor alpha polypeptide 1 (human) | Jackson Labs |
| B6.129P2(129S4)-Hprt10m(Ple162-EGFP/cre)Ems/Mmjax                | EGFP | <i>PITX3</i>   | paired-like homeodomain 3 (human)                                   | Jackson Labs |
| STOCK Tg(Piwil2/EGFP)1Ghan/J                                     | EGFP | <i>Piwil2</i>  | piwi-like RNA-mediated gene silencing 2 (mouse)                     | Jackson Labs |
| STOCK Tg(Piwil4/EGFP)1Ghan/J                                     | EGFP | <i>Piwil4</i>  | piwi-like RNA-mediated gene silencing 4 (mouse)                     | Jackson Labs |
| FVB-Tg(Pomc1-hrGFP)1Low/J                                        | EGFP | <i>Pomc</i>    | pro-opiomelanocortin-alpha (mouse)                                  | Jackson Labs |
| B6.Cg-Tg(Pomc-MAPT/Topaz)1Rck/J                                  | EGFP | <i>Pomc</i>    | pro-opiomelanocortin-alpha (mouse)                                  | Jackson Labs |
| C57BL/6J-Tg(Pomc-EGFP)1Low/J                                     | EGFP | <i>Pomc</i>    | pro-opiomelanocortin-alpha (mouse)                                  | Jackson Labs |
| B6;CBA-Tg(Pou5f1-EGFP)2Mnn/J                                     | EGFP | <i>Pou5f1</i>  | POU domain class 5 transcription factor 1 (mouse)                   | Jackson Labs |
| B6;129S4-Pou5f1tm2Jae/J                                          | EGFP | <i>Pou5f1</i>  | POU domain class 5 transcription factor 1 (mouse)                   | Jackson Labs |
| NOD.Cg-Prkdcscid Tg(CAG-EGFP)1Osb/Kupw/J                         | EGFP | <i>Prkdc</i>   | protein kinase DNA activated catalytic polypeptide                  | Jackson Labs |
| 129S6-Tg(Pmp-GFP/cre)1Blw/J                                      | EGFP | <i>Pmp</i>     | prion protein (mouse)                                               | Jackson Labs |
| STOCK Tg(PSCA-EGFP)1Witt/J                                       | EGFP | <i>PSCA</i>    | prostate stem cell antigen (human)                                  | Jackson Labs |
| STOCK Rag1tm1Mom Tg(TIE2GFP)287Sato/J                            | EGFP | <i>Rag1</i>    | recombination activating gene 1 (mouse)                             | Jackson Labs |
| B6.Cg-Rag1tm1Mom Tg(UBC-GFP)30Scha/J                             | EGFP | <i>Rag1</i>    | recombination activating gene 1 (mouse)                             | Jackson Labs |
| FVB-Tg(Rag2-EGFP)1Mnz/J                                          | EGFP | <i>Rag2</i>    | recombination activating gene 2 (rat)                               | Jackson Labs |
| B6.129P2(129S4)-Hprt9m(Ple178-EGFP/cre)Ems/Mmjax                 | EGFP | <i>RGS16</i>   | regulator of G-protein signaling 16 (human)                         | Jackson Labs |
| STOCK Hprt11m(Ple176-EGFP/cre)Ems/Mmjax                          | EGFP | <i>RGS16</i>   | regulator of G-protein signaling 16 (human)                         | Jackson Labs |
| B6.129P2(129S4)-Hprt12m(Ple177-EGFP/cre)Ems/Mmjax                | EGFP | <i>RGS16</i>   | regulator of G-protein signaling 16 (human)                         | Jackson Labs |
| B6.Cg-Tg(Rgs4-EGFP)4Lv/J                                         | EGFP | <i>Rgs4</i>    | regulator of G-protein signaling 4 (mouse)                          | Jackson Labs |
| B6.129P2(Cg)-Rorc2mLitt/J                                        | EGFP | <i>Rorc</i>    | RAR-related orphan receptor gamma (mouse)                           | Jackson Labs |
| STOCK Tg(Rr5-GFP/cre)1Sapc/J                                     | EGFP | <i>Rr5</i>     | regulatory region 5 (mouse)                                         | Jackson Labs |
| B6.Cg-Tg(S100a4-EGFP)M1Egn/Yunk/J                                | EGFP | <i>S100a4</i>  | S100 calcium binding protein A4 (mouse)                             | Jackson Labs |
| B6.129S6-S100a4tm1Egn/Yunk/J                                     | EGFP | <i>S100a4</i>  | S100 calcium binding protein A4 (mouse)                             | Jackson Labs |
| B6;D2-Tg(S100B-EGFP)1Wjt/J                                       | EGFP | <i>S100B</i>   | S100 calcium binding protein B (human)                              | Jackson Labs |
| Strain Name: B6.129P2(Cg)-Hprt7m(Ple185-EGFP)Ems/Mmjax           | EGFP | <i>S100B</i>   | S100 calcium binding protein B (human)                              | Jackson Labs |
| Strain Name: B6.129P2(Cg)-Hprt33m(Ple183-EGFP)Ems/Mmjax          | EGFP | <i>S100B</i>   | S100 calcium binding protein B (human)                              | Jackson Labs |
| Strain Name: B6.129P2(Cg)-Hprt34m(Ple186-EGFP)Ems/Mmjax          | EGFP | <i>S100B</i>   | S100 calcium binding protein B (human)                              | Jackson Labs |
| FVB.Cg-Smn1tm1Msd Tg(S100B-EGFP)1Wjt Tg(SMN2)89Ahmb              | EGFP | <i>S100B</i>   | S100 calcium binding protein B (human)                              | Jackson Labs |
| B6;DBA-Tg(S100b-EGFP/cre/ERT2)22Amc/J                            | EGFP | <i>S100b</i>   | S100 protein beta polypeptide neural (mouse)                        | Jackson Labs |
| C57BL/6-Tg(Scgb1a1-II17f,GFP)1Cdon/J                             | EGFP | <i>Scgb1a1</i> | secretoglobulin family 1A membrane 1                                | Jackson Labs |
| B6;FVB-Tg(Sfpi1,-EGFP)7Dgt/J                                     | EGFP | <i>Sfpi1</i>   | SFFV proviral integration 1 (mouse)                                 | Jackson Labs |
| B6.Cg-Shhtm1(EGFP/cre)Cjt/J                                      | EGFP | <i>Shh</i>     | sonic hedgehog (mouse)                                              | Jackson Labs |
| B6.129X1(Cg)-Shhtm6Amc/J                                         | EGFP | <i>Shh</i>     | sonic hedgehog (mouse)                                              | Jackson Labs |
| B6;129-Six2tm3(EGFP/cre/ERT2)Amc/J                               | EGFP | <i>Six2</i>    | sine oculis-related homeobox 2 (mouse)                              | Jackson Labs |
| STOCK Tg(Six2-EGFP/cre)1Amc/J                                    | EGFP | <i>Six2</i>    | sine oculis-related homeobox 2 (mouse)                              | Jackson Labs |
| STOCK Tg(Slc17a8-EGFP)1Edw/Seal/J                                | EGFP | <i>Slc17a8</i> | solute carrier family 17 membrane 8 (mouse)                         | Jackson Labs |
| STOCK Smn1tm1Msd Tg(Hlxb9-GFP)1Tmj Tg(SMN2)89Ahmb/J              | EGFP | <i>Smn1</i>    | survival motor neuron 1 (mouse)                                     | Jackson Labs |
| FVB.Cg-Smn1tm1Msd Tg(S100B-EGFP)1Wjt Tg(SMN2)89Ahmb              | EGFP | <i>Smn1</i>    | survival motor neuron 1 (mouse)                                     | Jackson Labs |
| STOCK Gt(ROSA)26Sortm1.1(rtTA,EGFP)NagySmn1tm1Msd Tg(EGFP        | EGFP | <i>Smn1</i>    | survival motor neuron 1 (mouse)                                     | Jackson Labs |
| STOCK Gt(ROSA)26Sortm1.1(rtTA,EGFP)NagySmn1tm1Msd Tg(EGFP        | EGFP | <i>Smn1</i>    | survival motor neuron 1 (mouse)                                     | Jackson Labs |
| STOCK Smn1tm1Msd Tg(Hlxb9-GFP)1Tmj Tg(SMN2)89Ahmb/J              | EGFP | <i>SMN2</i>    | survival of motor neuron 2 (human)                                  | Jackson Labs |
| FVB.Cg-Smn1tm1Msd Tg(S100B-EGFP)1Wjt Tg(SMN2)89Ahmb              | EGFP | <i>SMN2</i>    | survival of motor neuron 2 (human)                                  | Jackson Labs |
| FVB.Cg-Smn1tm1Msd Tg(S100B-EGFP)1Wjt Tg(SMN2)89Ahmb              | EGFP | <i>SMN2</i>    | survival of motor neuron 2 (human)                                  | Jackson Labs |
| STOCK Gt(ROSA)26Sortm1.1(rtTA,EGFP)NagySmn1tm1Msd Tg(EGFP        | EGFP | <i>SMN2</i>    | survival of motor neuron 2 (human)                                  | Jackson Labs |
| STOCK Gt(ROSA)26Sortm1.1(rtTA,EGFP)NagySmn1tm1Msd Tg(EGFP        | EGFP | <i>SMN2</i>    | survival of motor neuron 2 (human)                                  | Jackson Labs |
| STOCK Gt(ROSA)26Sortm1.1(rtTA,EGFP)NagySmn1tm1Msd Tg(EGFP        | EGFP | <i>SMN2</i>    | survival of motor neuron 2 (human)                                  | Jackson Labs |
| STOCK Gt(ROSA)26Sortm1.1(rtTA,EGFP)NagySmn1tm1Msd Tg(EGFP        | EGFP | <i>SMN2</i>    | survival of motor neuron 2 (human)                                  | Jackson Labs |
| Strain Name: B6;129S-Sox18tm1(GFP/cre/ERT2)Pzg/J                 | EGFP | <i>Sox18</i>   | SRY-box containing gene 18 (mouse)                                  | Jackson Labs |
| B6;129S-Sox2tm2Hoch/J                                            | EGFP | <i>Sox2</i>    | SRY-box containing gene 2 (mouse)                                   | Jackson Labs |
| C57BL/6J-Tg(Sry-EGFP)92Ei/EiJ                                    | EGFP | <i>Sry</i>     | sex determining region of Chr Y (mouse)                             | Jackson Labs |
| C57BL/6-Tg(Sry-EGFP)92Ei Tg(Sry)4Ei Chr YPOS/EiJ                 | EGFP | <i>Sry</i>     | sex determining region of Chr Y (mouse)                             | Jackson Labs |
| C57BL/6-Tg(Sry-EGFP)92Ei Tg(Sry)4Ei Chr YPOS/EiJ                 | EGFP | <i>Sry</i>     | sex determining region of Chr Y (mouse)                             | Jackson Labs |

|                                                           |      |                |                                                        |              |
|-----------------------------------------------------------|------|----------------|--------------------------------------------------------|--------------|
| C57BL/6-Tg(Sry-EGFP)92Ei Chr YAKR/J/EiJ                   | EGFP | <i>Sry</i>     | sex determining region of Chr Y (mouse)                | Jackson Labs |
| FVB.Cg-Tg(Tyr)3412ARpw Tg(Sry-EGFP)92Ei/EiJ               | EGFP | <i>Sry</i>     | sex determining region of Chr Y (mouse)                | Jackson Labs |
| B6.Cg-Tyrc-2J Tg(Tyr)3412ARpw Tg(Sry-EGFP)92Ei/EiJ        | EGFP | <i>Sry</i>     | sex determining region of Chr Y (mouse)                | Jackson Labs |
| B6;129S4-Tcf3tm5Zhu/J                                     | EGFP | <i>Tcf3</i>    | transcription factor 3 (mouse)                         | Jackson Labs |
| STOCK Tg(TIE2GFP)287Sato/J                                | EGFP | <i>Tek</i>     | endothelial-specific receptor tyrosine kinase (mouse)  | Jackson Labs |
| B6.Cg-Tg(TIE2GFP)287Sato/1J                               | EGFP | <i>Tek</i>     | endothelial-specific receptor tyrosine kinase (mouse)  | Jackson Labs |
| STOCK Rag1tm1Mom Tg(TIE2GFP)287Sato/J                     | EGFP | <i>Tek</i>     | endothelial-specific receptor tyrosine kinase (mouse)  | Jackson Labs |
| NOD.Cg-Tg(tetO-EGFP/FADD)1Doi/DoiJ                        | EGFP | tetO           | tet operator                                           | Jackson Labs |
| STOCK Tg(tetO-HIST1H2BJ/GFP)47Efu/J                       | EGFP | tetO           | tet operator                                           | Jackson Labs |
| STOCK Tg(tetO-Ipf1,EGFP)956.6Macd/J                       | EGFP | tetO           | tet operator                                           | Jackson Labs |
| C57BL/6-Tg(tetO-CDK5R1/GFP)337Lht/J                       | EGFP | tetO           | tet operator                                           | Jackson Labs |
| B6.FVB-Tg(tetO-EGFP,-Tgfr2)8Mcle/J                        | EGFP | tetO           | tet operator                                           | Jackson Labs |
| B6.Cg-Tg(Sp7-tTA,tetO-EGFP/cre)1Amc/J                     | EGFP | tetO           | tet operator                                           | Jackson Labs |
| B6;DBA-Tg(Fos-tTA,Fos-EGFP*)1Mmay Tg(tetO-lacZ,tTA*)1Mmay | EGFP | tetO           | tet operator                                           | Jackson Labs |
| Strain Name: STOCK Tg(tetO-tTomato,-Syp/EGFP*)1.1Luo/J    | EGFP | tetO           | tet operator                                           | Jackson Labs |
| STOCK Tg(Myh6*/tetO-GCaMP2)1Mik/J                         | EGFP | tetO           | tet operator                                           | Jackson Labs |
| B6.Cg-Tg(TetO-Axin1,EGFP)TA6Cos/J                         | EGFP | tetO           | tet operator                                           | Jackson Labs |
| STOCK Gt(ROSA)26Sortm1.1(rtTA,EGFP)NagySmn1tm1Msd Tg(EGFP | EGFP | tetO           | tet operator                                           | Jackson Labs |
| STOCK Gt(ROSA)26Sortm1.1(rtTA,EGFP)NagySmn1tm1Msd Tg(EGFP | EGFP | tetO           | tet operator                                           | Jackson Labs |
| STOCK Tg(tetO-GCaMP2)12Rlyu/J                             | EGFP | tetO           | tet operator                                           | Jackson Labs |
| B6N.Cg-Tg(tetO-GFP,-lacZ)G3Rsp/J                          | EGFP | tetO           | tet operator                                           | Jackson Labs |
| STOCK Tg(Thy1-EGFP)Mjrs/J                                 | EGFP | <i>Thy1</i>    | thymus cell antigen 1 theta (mouse)                    | Jackson Labs |
| B6.Cg-Tg(Thy1-EGFP)OJrs/Gfng/J                            | EGFP | <i>Thy1</i>    | thymus cell antigen 1 theta (mouse)                    | Jackson Labs |
| B6;CBA-Tg(Thy1-EGFP)Sjrs/Ndiv/J                           | EGFP | <i>Thy1</i>    | thymus cell antigen 1 theta (mouse)                    | Jackson Labs |
| B6;CBA-Tg(Thy1-spH)21Vnmu/J                               | EGFP | <i>Thy1</i>    | thymus cell antigen 1 theta (mouse)                    | Jackson Labs |
| B6;CBA-Tg(Thy1-spH)64Vnmu/Frk/J                           | EGFP | <i>Thy1</i>    | thymus cell antigen 1 theta (mouse)                    | Jackson Labs |
| B6;DBA-Tg(Tmem100-EGFP/cre/ERT2)30Amc/J                   | EGFP | <i>Tmem100</i> | transmembrane protein 100 (mouse)                      | Jackson Labs |
| Strain Name: B6.129P2(Cg)-Hprtmt54(Plc233-EGFP)Ems/Mmjax  | EGFP | <i>TNNT1</i>   | troponin T type 1 (human)                              | Jackson Labs |
| C57BL/6-Trim21tm1Hm/J                                     | EGFP | <i>Trim21</i>  | tripartite motif-containing 21 (mouse)                 | Jackson Labs |
| STOCK Trpm8tm1Apat/J                                      | EGFP | <i>Trpm8</i>   | transient receptor potential cation channel            | Jackson Labs |
| B6;D-Tg(Tshz3-GFP/cre)43Amc/J                             | EGFP | <i>Tshz3</i>   | teashirt zinc finger family member 3 (mouse)           | Jackson Labs |
| FVB.Cg-Tg(Tyr)3412ARpw Tg(Sry-EGFP)92Ei/EiJ               | EGFP | <i>Tyr</i>     | tyrosinase (mouse)                                     | Jackson Labs |
| B6.Cg-Tyrc-2J Tg(Tyr)3412ARpw Tg(Sry-EGFP)92Ei/EiJ        | EGFP | <i>Tyr</i>     | tyrosinase (mouse)                                     | Jackson Labs |
| B6(C)-Tg(UAS-EGFP,-SOD1*G37R)135Gsn/J                     | EGFP | <i>UAS</i>     | upstream activating sequence (yeast)                   | Jackson Labs |
| B6(C)-Tg(UAS-EGFP,-SOD1*G37R)677Gsn/J                     | EGFP | <i>UAS</i>     | upstream activating sequence (yeast)                   | Jackson Labs |
| C57BL/6-Tg(UBC-GFP)30Scha/J                               | EGFP | <i>UBC</i>     | ubiquitin C (human)                                    | Jackson Labs |
| CByJ.B6-Tg(UBC-GFP)30Scha/J                               | EGFP | <i>UBC</i>     | ubiquitin C (human)                                    | Jackson Labs |
| B6.Cg-Rag1tm1Mom Tg(UBC-GFP)30Scha/J                      | EGFP | <i>UBC</i>     | ubiquitin C (human)                                    | Jackson Labs |
| B6.Cg-Tg(UBC-GFP,-TVA)1C1c/J                              | EGFP | <i>UBC</i>     | ubiquitin C (human)                                    | Jackson Labs |
| B6.Cg-Tg(UBC-GFP,-TVA)2C1c/J                              | EGFP | <i>UBC</i>     | ubiquitin C (human)                                    | Jackson Labs |
| B6.Cg-Tg(UBC-GFP,-TVA)3C1c/J                              | EGFP | <i>UBC</i>     | ubiquitin C (human)                                    | Jackson Labs |
| STOCK Tg(Uchl1-HIST2H2BE/mCherry/EGFP*)FSout/J            | EGFP | <i>Uchl1</i>   | ubiquitin carboxy-terminal hydrolase L1 (mouse)        | Jackson Labs |
| B6;DBA-Tg(Upk3a-GFP/cre/ERT2)26Amc/J                      | EGFP | <i>Upk3a</i>   | uroplakin 3A (mouse)                                   | Jackson Labs |
| Strain Name: STOCK Vmn1r49tm2Mom/MomJ                     | EGFP | <i>Vmn1r49</i> | vomeroneasal 1 receptor 49 (mouse)                     | Jackson Labs |
| Strain Name: STOCK Vmn1r49tm3Mom/MomJ                     | EGFP | <i>Vmn1r49</i> | vomeroneasal 1                                         | Jackson Labs |
| B6;129P2-Vmn2r26tm2Mom/MomJ                               | EGFP | <i>Vmn2r26</i> | vomeroneasal 2                                         | Jackson Labs |
| STOCK Tg(Chx10-EGFP/cre,-ALPP)2C1c/J                      | EGFP | <i>Vsx2</i>    | visual system homeobox 2 (rat)                         | Jackson Labs |
| STOCK Wt1tm1(EGFP/cre)Wtp/J                               | EGFP | <i>Wt1</i>     | Wilms tumor 1 homolog (mouse)                          | Jackson Labs |
| B6;129P2-Zbtb7b7tm2Litt/J                                 | EGFP | <i>Zbtb7b</i>  | zinc finger and BTB domain containing 7B (mouse)       | Jackson Labs |
| B6;FVB-Tg(Zfp423-EGFP)7Brsp/J                             | EGFP | <i>Zfp423</i>  | zinc finger protein 423 (mouse)                        | Jackson Labs |
| STOCK Tg(Zp3-EGFP)1Dean/J                                 | EGFP | <i>Zp3</i>     | zona pellucida glycoprotein 3 (mouse)                  | Jackson Labs |
| Tg(1110008P14Rik-EGFP)MF81Gsat                            | EGFP | 1110008P14Rik  | RIKEN cDNA 1110008P14 gene                             | Gensat       |
| Tg(1700021K19Rik-EGFP)FR22Gsat                            | EGFP | 1700021K19Rik  | RIKEN cDNA 1700021K19 gene                             | Gensat       |
| Tg(1810041L15Rik-EGFP)LB302Gsat                           | EGFP | 1810041L15Rik  | RIKEN cDNA 1810041L15 gene                             | Gensat       |
| Tg(2410066E13Rik-EGFP)OS7Gsat                             | EGFP | 2410066E13Rik  | RIKEN cDNA 2410066E13 gene                             | Gensat       |
| Tg(3632451O06Rik-EGFP)ND4Gsat                             | EGFP | 3632451O06Rik  | RIKEN cDNA 3632451O06 gene                             | Gensat       |
| Tg(4932418E24Rik-EGFP)JLP199Gsat                          | EGFP | 4932418E24Rik  | RIKEN cDNA 4932418E24 gene                             | Gensat       |
| Tg(6030405A18Rik-EGFP)JP93Gsat                            | EGFP | 6030405A18Rik  | RIKEN cDNA 6030405A18 gene                             | Gensat       |
| Tg(6330403A02Rik-EGFP)OC152Gsat                           | EGFP | 6330403A02Rik  | RIKEN cDNA 6330403A02 gene                             | Gensat       |
| Tg(6430573F11Rik-EGFP)CK32Gsat                            | EGFP | 6430573F11Rik  | RIKEN cDNA 6430573F11 gene                             | Gensat       |
| Tg(9430020K01Rik-EGFP)JL69Gsat                            | EGFP | 9430020K01Rik  | RIKEN cDNA 9430020K01 gene                             | Gensat       |
| Tg(9630033F20Rik-EGFP)NR39Gsat                            | EGFP | 9630033F20Rik  | RIKEN cDNA 9630033F20 gene                             | Gensat       |
| Tg(9930013L23Rik-EGFP)KO123Gsat                           | EGFP | 9930013L23Rik  | RIKEN cDNA 9930013L23 gene                             | Gensat       |
| Tg(A230065H16Rik-EGFP)JY49Gsat                            | EGFP | A230065H16Rik  | RIKEN cDNA A230065H16 gene                             | Gensat       |
| Tg(A930038C07Rik-EGFP)JV74Gsat                            | EGFP | A930038C07Rik  | RIKEN cDNA A930038C07 gene                             | Gensat       |
| Tg(Aatf-EGFP)FM281Gsat                                    | EGFP | <i>Aatf</i>    | apoptosis antagonizing transcription factor            | Gensat       |
| Tg(Abcb6-EGFP)QL20Gsat                                    | EGFP | <i>Abcb6</i>   | ATP-binding cassette, sub-family B (MDR/TAP), member 6 | Gensat       |
| Tg(Abhd3-EGFP)JL13Gsat                                    | EGFP | <i>Abhd3</i>   | abhydrolase domain containing 3                        | Gensat       |
| Tg(Abhd5-EGFP)HW206Gsat                                   | EGFP | <i>Abhd5</i>   | abhydrolase domain containing 5                        | Gensat       |
| Tg(Abl2-EGFP)HV66Gsat                                     | EGFP | <i>Abl2</i>    | v-abl Abelson murine leukemia viral oncogene homolog 2 | Gensat       |
| Tg(Ablim2-EGFP)KX71Gsat                                   | EGFP | <i>Ablim2</i>  | actin-binding LIM protein 2                            | Gensat       |
| Tg(Acaa2-EGFP)QE25Gsat                                    | EGFP | <i>Acaa2</i>   | acetyl-Coenzyme A acyltransferase 2 (mitochondria)     | Gensat       |
| Tg(Accn4-EGFP)PD91Gsat                                    | EGFP | <i>Accn4</i>   | amiloride-sensitive cation channel 4, pituitary        | Gensat       |
| Tg(Actb-EGFP)OR63Gsat                                     | EGFP | <i>Actb</i>    | actin, beta                                            | Gensat       |

|                            |      |          |                                                       |        |
|----------------------------|------|----------|-------------------------------------------------------|--------|
| Tg(Acvr1c-EGFP)CB104Gsat   | EGFP | Acvr1c   | activin A receptor, type IC                           | Gensat |
| Tg(Adam11-EGFP)IS19Gsat    | EGFP | Adam11   | a disintegrin and metallopeptidase domain 11          | Gensat |
| Tg(Adam23-EGFP)LR169Gsat   | EGFP | Adam23   | a disintegrin and metallopeptidase domain 23          | Gensat |
| Tg(Adcy1-EGFP)JS52Gsat     | EGFP | Adcy1    | adenylate cyclase 1                                   | Gensat |
| Tg(Adcyap1-EGFP)FB22Gsat   | EGFP | Adcyap1  | adenylate cyclase activating polypeptide 1            | Gensat |
| Tg(Adora2a-EGFP)EP141Gsat  | EGFP | Adora2a  | adenosine A2a receptor                                | Gensat |
| Tg(Adra2a-EGFP)GA70Gsat    | EGFP | Adra2a   | adrenergic receptor, alpha 2a                         | Gensat |
| Tg(Adra2c-EGFP)HZ102Gsat   | EGFP | Adra2c   | adrenergic receptor, alpha 2c                         | Gensat |
| Tg(AF529169-EGFP)KR488Gsat | EGFP | AF529169 | cDNA sequence AF529169                                | Gensat |
| Tg(Agt-EGFP)FQ398Gsat      | EGFP | Agt      | angiotensinogen (serpin peptidase inhibitor, clade A  | Gensat |
| Tg(Agtbbp1-EGFP)OI30Gsat   | EGFP | Agtbbp1  | ATP/GTP binding protein 1                             | Gensat |
| Tg(Agtr1a-EGFP)NZ44Gsat    | EGFP | Agtr1a   | angiotensin II receptor, type 1a                      | Gensat |
| Tg(Agtr2-EGFP)IP72Gsat     | EGFP | Agtr2    | angiotensin II receptor, type 2                       | Gensat |
| Tg(AI836003-EGFP)NZ79Gsat  | EGFP | AI836003 | expressed sequence AI836003                           | Gensat |
| Tg(Ak4-EGFP)GO205Gsat      | EGFP | Ak4      | adenylate kinase 4                                    | Gensat |
| Tg(Akap12-EGFP)IU72Gsat    | EGFP | Akap12   | A kinase (PRKA) anchor protein (gravin) 12            | Gensat |
| Tg(Akr1c18-EGFP)OY9Gsat    | EGFP | Akr1c18  | aldo-keto reductase family 1, member C18              | Gensat |
| Tg(Aldh111-EGFP)OFC789Gsat | EGFP | Aldh111  | aldehyde dehydrogenase 1 family, member L1            | Gensat |
| Tg(Aldh7a1-EGFP)JA59Gsat   | EGFP | Aldh7a1  | aldehyde dehydrogenase family 7, member A1            | Gensat |
| Tg(Als2-EGFP)IP127Gsat     | EGFP | Als2     | amyotrophic lateral sclerosis 2 (juvenile) homolog 1  | Gensat |
| Tg(Amigo1-EGFP)FL213Gsat   | EGFP | Amigo1   | adhesion molecule with Ig like domain 1               | Gensat |
| Tg(Amigo2-EGFP)LW244Gsat   | EGFP | Amigo2   | adhesion molecule with Ig like domain 2               | Gensat |
| Tg(Angpt2-EGFP)DJ90Gsat    | EGFP | Angpt2   | angiopoietin 2                                        | Gensat |
| Tg(Ank-EGFP)LU141Gsat      | EGFP | Ank      | progressive ankylosis                                 | Gensat |
| Tg(Ank2-EGFP)DY49Gsat      | EGFP | Ank2     | ankyrin 2, brain                                      | Gensat |
| Tg(Ankrd34b-EGFP)LY68Gsat  | EGFP | Ankrd34b | ankyrin repeat domain 34B                             | Gensat |
| Tg(Anxa2-EGFP)JY66Gsat     | EGFP | Anxa2    | annexin A2                                            | Gensat |
| Tg(Anxa4-EGFP)ME72Gsat     | EGFP | Anxa4    | annexin A4                                            | Gensat |
| Tg(Api5-EGFP)LY118Gsat     | EGFP | Api5     | apoptosis inhibitor 5                                 | Gensat |
| Tg(Apod-EGFP)GN316Gsat     | EGFP | Apod     | apolipoprotein D                                      | Gensat |
| Tg(Aqp4-EGFP)NI19Gsat      | EGFP | Aqp4     | aquaporin 4                                           | Gensat |
| Tg(Arc-EGFP)EL194Gsat      | EGFP | Arc      | activity regulated cytoskeletal-associated protein    | Gensat |
| Tg(Arf6-EGFP)GT31Gsat      | EGFP | Arf6     | ADP-ribosylation factor 6                             | Gensat |
| Tg(Arhgap33-EGFP)LA99Gsat  | EGFP | Arhgap33 | Rho GTPase activating protein 33                      | Gensat |
| Tg(Arhgdib-EGFP)KY11Gsat   | EGFP | Arhgdib  | Rho, GDP dissociation inhibitor (GDI) beta            | Gensat |
| Tg(Arhgdig-EGFP)HB28Gsat   | EGFP | Arhgdig  | Rho GDP dissociation inhibitor (GDI) gamma            | Gensat |
| Tg(Arhgef6-EGFP)HG42Gsat   | EGFP | Arhgef6  | Rac/Cdc42 guanine nucleotide exchange factor (GE      | Gensat |
| Tg(Arl4c-EGFP)KS235Gsat    | EGFP | Arl4c    | ADP-ribosylation factor-like 4C                       | Gensat |
| Tg(Arl6ip1-EGFP)JL391Gsat  | EGFP | Arl6ip1  | ADP-ribosylation factor-like 6 interacting protein 1  | Gensat |
| Tg(Arpp21-EGFP)FJ71Gsat    | EGFP | Arpp21   | cyclic AMP-regulated phosphoprotein, 21               | Gensat |
| Tg(Arx-EGFP)EO256Gsat      | EGFP | Arx      | aristaless related homeobox                           | Gensat |
| Tg(Asb4-EGFP)HW181Gsat     | EGFP | Asb4     | ankyrin repeat and SOCS box-containing 4              | Gensat |
| Tg(Ascl1-EGFP)AU176Gsat    | EGFP | Ascl1    | achaete-scute complex homolog 1 (Drosophila)          | Gensat |
| Tg(Aspm-EGFP)IH113Gsat     | EGFP | Aspm     | asp (abnormal spindle)-like, microcephaly associated  | Gensat |
| Tg(Atg4c-EGFP)JA107Gsat    | EGFP | Atg4c    | autophagy-related 4C (yeast)                          | Gensat |
| Tg(Atic-EGFP)ED29Gsat      | EGFP | Atic     | 5-aminoimidazole-4-carboxamide ribonucleotide for     | Gensat |
| Tg(Atp1a1-EGFP)OC87Gsat    | EGFP | Atp1a1   | ATPase, Na+/K+ transporting, alpha 1 polypeptide      | Gensat |
| Tg(Atp1b1-EGFP)GT91Gsat    | EGFP | Atp1b1   | ATPase, Na+/K+ transporting, beta 1 polypeptide       | Gensat |
| Tg(Atp5a1-EGFP)IE419Gsat   | EGFP | Atp5a1   | ATP synthase, H+ transporting, mitochondrial F1 cc    | Gensat |
| Tg(Atp5j2-EGFP)FE265Gsat   | EGFP | Atp5j2   | ATP synthase, H+ transporting, mitochondrial F0 cc    | Gensat |
| Tg(Atp6v1b2-EGFP)IE336Gsat | EGFP | Atp6v1b2 | ATPase, H+ transporting, lysosomal V1 subunit B2      | Gensat |
| Tg(Atpif1-EGFP)GW85Gsat    | EGFP | Atpif1   | ATPase inhibitory factor 1                            | Gensat |
| Tg(Avil-EGFP)QD84Gsat      | EGFP | Avil     | advillin                                              | Gensat |
| Tg(Avp-EGFP)HF200Gsat      | EGFP | Avp      | arginine vasopressin                                  | Gensat |
| Tg(Avpr1a-EGFP)KT87Gsat    | EGFP | Avpr1a   | arginine vasopressin receptor 1A                      | Gensat |
| Tg(Avpr1b-EGFP)QD23Gsat    | EGFP | Avpr1b   | arginine vasopressin receptor 1B                      | Gensat |
| Tg(B2m-EGFP)JM76Gsat       | EGFP | B2m      | beta-2 microglobulin                                  | Gensat |
| Tg(B3gat1-EGFP)KJ277Gsat   | EGFP | B3gat1   | beta-1,3-glucuronyltransferase 1 (glucuronosyltrans   | Gensat |
| Tg(B3gat2-EGFP)NG126Gsat   | EGFP | B3gat2   | beta-1,3-glucuronyltransferase 2 (glucuronosyltrans   | Gensat |
| Tg(Bahcc1-EGFP)FZ71Gsat    | EGFP | Bahcc1   | BAH domain and coiled-coil containing 1               | Gensat |
| Tg(Baiap2-EGFP)JS151Gsat   | EGFP | Baiap2   | brain-specific angiogenesis inhibitor 1-associated pi | Gensat |
| Tg(Baiap3-EGFP)NJ62Gsat    | EGFP | Baiap3   | BAI1-associated protein 3                             | Gensat |
| Tg(Barhl1-EGFP)GS25Gsat    | EGFP | Barhl1   | BarH-like 1 (Drosophila)                              | Gensat |
| Tg(Basp1-EGFP)GO41Gsat     | EGFP | Basp1    | brain abundant, membrane attached signal protein      | Gensat |
| Tg(Bcan-EGFP)JZ76Gsat      | EGFP | Bcan     | brevican                                              | Gensat |
| Tg(Bcar1-EGFP)JP115Gsat    | EGFP | Bcar1    | breast cancer anti-estrogen resistance 1              | Gensat |
| Tg(Becn1-EGFP)CZ48Gsat     | EGFP | Becn1    | beclin 1, autophagy related                           | Gensat |
| Tg(Bend5-EGFP)NA233Gsat    | EGFP | Bend5    | BEN domain containing 5                               | Gensat |
| Tg(Bhlhe40-EGFP)PX84Gsat   | EGFP | Bhlhe40  | basic helix-loop-helix family, member e40             | Gensat |
| Tg(Bmp1-EGFP)IL335Gsat     | EGFP | Bmp1     | bone morphogenetic protein 1                          | Gensat |
| Tg(Bmp6-EGFP)BH95Gsat      | EGFP | Bmp6     | bone morphogenetic protein 6                          | Gensat |
| Tg(Bmp7-EGFP)BH238Gsat     | EGFP | Bmp7     | bone morphogenetic protein 7                          | Gensat |
| Tg(Bmpr1a-EGFP)90Gsat: NA  | EGFP | Bmpr1a   | bone morphogenetic protein receptor, type 1A          | Gensat |
| Tg(Bmpr1a-EGFP)JD90Gsat    | EGFP | Bmpr1a   | bone morphogenetic protein receptor, type 1A          | Gensat |

|                                |      |              |                                                       |        |
|--------------------------------|------|--------------|-------------------------------------------------------|--------|
| Tg(Bnip3-EGFP)IA142Gsat        | EGFP | Bnip3        | BCL2/adenovirus E1B interacting protein 3             | Gensat |
| Tg(Bsx-EGFP)JD98Gsat           | EGFP | Bsx          | brain specific homeobox                               | Gensat |
| Tg(Btbd17-EGFP)FX313Gsat       | EGFP | Btbd17       | BTB (POZ) domain containing 17                        | Gensat |
| Tg(Btg1-EGFP)HW278Gsat         | EGFP | Btg1         | B-cell translocation gene 1, anti-proliferative       | Gensat |
| Tg(Btg2-EGFP)LS85Gsat          | EGFP | Btg2         | B-cell translocation gene 2, anti-proliferative       | Gensat |
| Tg(Btg3-EGFP)LI40Gsat          | EGFP | Btg3         | B-cell translocation gene 3                           | Gensat |
| Tg(C130060K24Rik-EGFP)QC14Gsat | EGFP | C130060K24Ri | RIKEN cDNA C130060K24 gene                            | Gensat |
| Tg(C1qI2-EGFP)KP107Gsat        | EGFP | C1qI2        | complement component 1, q subcomponent-like 2         | Gensat |
| Tg(C1qI3-EGFP)NT90Gsat         | EGFP | C1qI3        | C1q-like 3                                            | Gensat |
| Tg(C2cd2I-EGFP)IH153Gsat       | EGFP | C2cd2I       | C2 calcium-dependent domain containing 2-like         | Gensat |
| Tg(Cables1-EGFP)MA66Gsat       | EGFP | Cables1      | CDK5 and Abl enzyme substrate 1                       | Gensat |
| Tg(Cabp7-EGFP)MB67Gsat         | EGFP | Cabp7        | calcium binding protein 7                             | Gensat |
| Tg(Cacna1g-EGFP)FK99Gsat       | EGFP | Cacna1g      | calcium channel, voltage-dependent, T type, alpha     | Gensat |
| Tg(Cacna1h-EGFP)NC225Gsat      | EGFP | Cacna1h      | calcium channel, voltage-dependent, T type, alpha     | Gensat |
| Tg(Cacnb1-EGFP)IL327Gsat       | EGFP | Cacnb1       | calcium channel, voltage-dependent, beta 1 subunit    | Gensat |
| Tg(Cacng3-EGFP)ID128Gsat       | EGFP | Cacng3       | calcium channel, voltage-dependent, gamma subunit     | Gensat |
| Tg(Cacng7-EGFP)LJ124Gsat       | EGFP | Cacng7       | calcium channel, voltage-dependent, gamma subunit     | Gensat |
| Tg(Calb1-EGFP)OFC1Gsat         | EGFP | Calb1        | calbindin 1                                           | Gensat |
| Tg(Calb2-EGFP)CM104Gsat        | EGFP | Calb2        | calbindin 2                                           | Gensat |
| Tg(Calca-EGFP)FG104Gsat        | EGFP | Calca        | calcitonin/calcitonin-related polypeptide, alpha      | Gensat |
| Tg(Calcb-EGFP)PE53Gsat         | EGFP | Calcb        | calcitonin-related polypeptide, beta                  | Gensat |
| Tg(Calcr-EGFP)JI134Gsat        | EGFP | Calcr        | calcitonin receptor                                   | Gensat |
| Tg(Camk1g-EGFP)LB111Gsat       | EGFP | Camk1g       | calcium/calmodulin-dependent protein kinase I gamma   | Gensat |
| Tg(Camkk2-EGFP)DF129Gsat       | EGFP | Camkk2       | calcium/calmodulin-dependent protein kinase kinase    | Gensat |
| Tg(Camkv-EGFP)LN190Gsat        | EGFP | Camkv        | CaM kinase-like vesicle-associated                    | Gensat |
| Tg(Capns1-EGFP)JM95Gsat        | EGFP | Capns1       | calpain, small subunit 1                              | Gensat |
| Tg(Car12-EGFP)IF37Gsat         | EGFP | Car12        | carbonic anhydrase 12                                 | Gensat |
| Tg(Car3-EGFP)NT174Gsat         | EGFP | Car3         | carbonic anhydrase 3                                  | Gensat |
| Tg(Card6-EGFP)HV22Gsat         | EGFP | Card6        | caspase recruitment domain family, member 6           | Gensat |
| Tg(Cartpt-EGFP)KT69Gsat        | EGFP | Cartpt       | CART prepropeptide                                    | Gensat |
| Tg(Casp8-EGFP)FL162Gsat        | EGFP | Casp8        | caspase 8                                             | Gensat |
| Tg(Casp9-EGFP)JC92Gsat         | EGFP | Casp9        | caspase 9                                             | Gensat |
| Tg(Casr-EGFP)G226Gsat          | EGFP | Casr         | calcium-sensing receptor                              | Gensat |
| Tg(Cbln1-EGFP)JD6Gsat          | EGFP | Cbln1        | cerebellin 1 precursor protein                        | Gensat |
| Tg(Cbln2-EGFP)IF387Gsat        | EGFP | Cbln2        | cerebellin 2 precursor protein                        | Gensat |
| Tg(Cbln3-EGFP)HF357Gsat        | EGFP | Cbln3        | cerebellin 3 precursor protein                        | Gensat |
| Tg(Cbln4-EGFP)IG145Gsat        | EGFP | Cbln4        | cerebellin 4 precursor protein                        | Gensat |
| Tg(Cbx5-EGFP)DH115Gsat         | EGFP | Cbx5         | chromobox homolog 5 (Drosophila HP1a)                 | Gensat |
| Tg(Ccdc163-EGFP)FE60Gsat       | EGFP | Ccdc163      | coiled-coil domain containing 163                     | Gensat |
| Tg(Ccdc3-EGFP)IA10Gsat         | EGFP | Ccdc3        | coiled-coil domain containing 3                       | Gensat |
| Tg(Cck-EGFP)BJ203Gsat          | EGFP | Cck          | cholecystokinin                                       | Gensat |
| Tg(Cckbr-EGFP)KR80Gsat         | EGFP | Cckbr        | cholecystokinin B receptor                            | Gensat |
| Tg(Ccna2-EGFP)IK7Gsat          | EGFP | Ccna2        | cyclin A2                                             | Gensat |
| Tg(Ccond1-EGFP)FP70Gsat        | EGFP | Ccond1       | cyclin D1                                             | Gensat |
| Tg(Ccne2-EGFP)FC22Gsat         | EGFP | Ccne2        | cyclin E2                                             | Gensat |
| Tg(Cd34-EGFP)MF6Gsat           | EGFP | Cd34         | CD34 antigen                                          | Gensat |
| Tg(Cd63-EGFP)LC2Gsat           | EGFP | Cd63         | CD63 antigen                                          | Gensat |
| Tg(Cd82-EGFP)OA62Gsat          | EGFP | Cd82         | CD82 antigen                                          | Gensat |
| Tg(Cdc27-EGFP)J43Gsat          | EGFP | Cdc27        | cell division cycle 27 homolog (S. cerevisiae)        | Gensat |
| Tg(Cdc42bpg-EGFP)NB124Gsat     | EGFP | Cdc42bpg     | CDC42 binding protein kinase gamma (DMPK-like)        | Gensat |
| Tg(Cdc42ep4-EGFP)HO179Gsat     | EGFP | Cdc42ep4     | CDC42 effector protein (Rho GTPase binding) 4         | Gensat |
| Tg(Cdc45-EGFP)NJ81Gsat         | EGFP | Cdc45        | cell division cycle 45 homolog (S. cerevisiae)        | Gensat |
| Tg(Cdh1-EGFP)AR201Gsat         | EGFP | Cdh1         | cadherin 1                                            | Gensat |
| Tg(Cdh11-EGFP)DL31Gsat         | EGFP | Cdh11        | cadherin 11                                           | Gensat |
| Tg(Cdh3-EGFP)BK102Gsat         | EGFP | Cdh3         | cadherin 3                                            | Gensat |
| Tg(Cdh6-EGFP)LB155Gsat         | EGFP | Cdh6         | cadherin 6                                            | Gensat |
| Tg(Cdh9-EGFP)LN14Gsat          | EGFP | Cdh9         | cadherin 9                                            | Gensat |
| Tg(Cdhr1-EGFP)IB74Gsat         | EGFP | Cdhr1        | cadherin-related family member 1                      | Gensat |
| Tg(Cdk17-EGFP)DZ62Gsat         | EGFP | Cdk17        | cyclin-dependent kinase 17                            | Gensat |
| Tg(Cdk4-EGFP)ET103Gsat         | EGFP | Cdk4         | cyclin-dependent kinase 4                             | Gensat |
| Tg(Cdk6-EGFP)FO245Gsat         | EGFP | Cdk6         | cyclin-dependent kinase 6                             | Gensat |
| Tg(Cdkn1b-EGFP)GI111Gsat       | EGFP | Cdkn1b       | cyclin-dependent kinase inhibitor 1B                  | Gensat |
| Tg(Cdkn2a-EGFP)GR30Gsat        | EGFP | Cdkn2a       | cyclin-dependent kinase inhibitor 2A                  | Gensat |
| Tg(Cdkn2c-EGFP)GN18Gsat        | EGFP | Cdkn2c       | cyclin-dependent kinase inhibitor 2C (p18, inhibits C | Gensat |
| Tg(Cdkn2d-EGFP)DZ41Gsat        | EGFP | Cdkn2d       | cyclin-dependent kinase inhibitor 2D (p19, inhibits C | Gensat |
| Tg(Cdon-EGFP)CJ220Gsat         | EGFP | Cdon         | cell adhesion molecule-related/down-regulated by c    | Gensat |
| Tg(Cdr2-EGFP)AQ149Gsat         | EGFP | Cdr2         | cerebellar degeneration-related 2                     | Gensat |
| Tg(Celf6-EGFP)KS321Gsat        | EGFP | Celf6        | CUGBP, Elav-like family member 6                      | Gensat |
| Tg(Chat-EGFP)GH293Gsat         | EGFP | Chat         | choline acetyltransferase                             | Gensat |
| Tg(Chd7-EGFP)JE59Gsat          | EGFP | Chd7         | chromodomain helicase DNA binding protein 7           | Gensat |
| Tg(Chn2-EGFP)JC77Gsat          | EGFP | Chn2         | chimerin (chimaerin) 2                                | Gensat |
| Tg(Chrm1-EGFP)IO35Gsat         | EGFP | Chrm1        | cholinergic receptor, muscarinic 1, CNS               | Gensat |
| Tg(Chrm4-EGFP)Y86Gsat          | EGFP | Chrm4        | cholinergic receptor, muscarinic 4                    | Gensat |
| Tg(Chrm5-EGFP)PE14Gsat         | EGFP | Chrm5        | cholinergic receptor, muscarinic 5                    | Gensat |

|                                |      |              |                                                         |        |
|--------------------------------|------|--------------|---------------------------------------------------------|--------|
| Tg(Chma2-EGFP)OF8Gsat          | EGFP | Chma2        | cholinergic receptor, nicotinic, alpha polypeptide 2 (  | Gensat |
| Tg(Chma3-EGFP)BZ135Gsat        | EGFP | Chma3        | cholinergic receptor, nicotinic, alpha polypeptide 3    | Gensat |
| Tg(Chma4-EGFP)ME19Gsat         | EGFP | Chma4        | cholinergic receptor, nicotinic, alpha polypeptide 4    | Gensat |
| Tg(Chma5-EGFP)JG16Gsat         | EGFP | Chma5        | cholinergic receptor, nicotinic, alpha polypeptide 5    | Gensat |
| Tg(Chma6-EGFP)BR211Gsat        | EGFP | Chma6        | cholinergic receptor, nicotinic, alpha polypeptide 6    | Gensat |
| Tg(Chma7-EGFP)JL46Gsat         | EGFP | Chma7        | cholinergic receptor, nicotinic, alpha polypeptide 7    | Gensat |
| Tg(Chmb2-EGFP)JR125Gsat        | EGFP | Chmb2        | cholinergic receptor, nicotinic, beta polypeptide 2 (n  | Gensat |
| Tg(Chmb3-EGFP)EV112Gsat        | EGFP | Chmb3        | cholinergic receptor, nicotinic, beta polypeptide 3     | Gensat |
| Tg(Chmb4-EGFP)CL200Gsat        | EGFP | Chmb4        | cholinergic receptor, nicotinic, beta polypeptide 4     | Gensat |
| Tg(Chst15-EGFP)LM154Gsat       | EGFP | Chst15       | carbohydrate (N-acetylglactosamine 4-sulfate 6-O        | Gensat |
| Tg(Cic-EGFP)KP260Gsat          | EGFP | Cic          | capicua homolog (Drosophila)                            | Gensat |
| Tg(Cisd1-EGFP)JO34Gsat         | EGFP | Cisd1        | CDGSH iron sulfur domain 1                              | Gensat |
| Tg(Ckmt1-EGFP)JB4Gsat          | EGFP | Ckmt1        | creatine kinase, mitochondrial 1, ubiquitous            | Gensat |
| Tg(Cldn1-EGFP)OR95Gsat         | EGFP | Cldn1        | claudin 1                                               | Gensat |
| Tg(Cldn2-EGFP)OU78Gsat         | EGFP | Cldn2        | claudin 2                                               | Gensat |
| Tg(Clic6-EGFP)HR247Gsat        | EGFP | Clic6        | chloride intracellular channel 6                        | Gensat |
| Tg(Clock-EGFP)JN7Gsat          | EGFP | Clock        | circadian locomotor output cycles kaput                 | Gensat |
| Tg(Clu-EGFP)OD95Gsat           | EGFP | Clu          | clusterin                                               | Gensat |
| Tg(Clvs2-EGFP)NC98Gsat         | EGFP | Clvs2        | clavesin 2                                              | Gensat |
| Tg(Cmtm5-EGFP)DL108Gsat        | EGFP | Cmtm5        | CKLF-like MARVEL transmembrane domain containi          | Gensat |
| Tg(Cnm2-EGFP)FC285Gsat         | EGFP | Cnm2         | cyclin M2                                               | Gensat |
| Tg(Cnr1-EGFP)BR249Gsat         | EGFP | Cnr1         | cannabinoid receptor 1 (brain)                          | Gensat |
| Tg(Cntfr-EGFP)LO320Gsat        | EGFP | Cntfr        | ciliary neurotrophic factor receptor                    | Gensat |
| Tg(Cntn2-EGFP)HY344Gsat        | EGFP | Cntn2        | contactin 2                                             | Gensat |
| Tg(Cntnap1-EGFP)KU118Gsat      | EGFP | Cntnap1      | contactin associated protein-like 1                     | Gensat |
| Tg(Coch-EGFP)IH357Gsat         | EGFP | Coch         | coagulation factor C homolog (Limulus polyphemus        | Gensat |
| Tg(Col18a1-EGFP)IH439Gsat      | EGFP | Col18a1      | collagen, type XVIII, alpha 1                           | Gensat |
| Tg(Col3a1-EGFP)DJ124Gsat       | EGFP | Col3a1       | collagen, type III, alpha 1                             | Gensat |
| Tg(Col6a1-EGFP)JB13Gsat        | EGFP | Col6a1       | collagen, type VI, alpha 1                              | Gensat |
| Tg(Comp-EGFP)GN237Gsat         | EGFP | Comp         | cartilage oligomeric matrix protein                     | Gensat |
| Tg(Cpe-EGFP)FW206Gsat          | EGFP | Cpe          | carboxypeptidase E                                      | Gensat |
| Tg(Cplx3-EGFP)JO104Gsat        | EGFP | Cplx3        | complexin 3                                             | Gensat |
| Tg(Cpne6-EGFP)JS29Gsat         | EGFP | Cpne6        | copine VI                                               | Gensat |
| Tg(Cpt1a-EGFP)IP41Gsat         | EGFP | Cpt1a        | carnitine palmitoyltransferase 1a, liver                | Gensat |
| Tg(Crabp1-EGFP)HD10Gsat        | EGFP | Crabp1       | cellular retinoic acid binding protein I                | Gensat |
| Tg(Creb1-EGFP)NK165Gsat        | EGFP | Creb1        | cAMP responsive element binding protein 1               | Gensat |
| Tg(Crh-EGFP)HS57Gsat           | EGFP | Crh          | corticotropin releasing hormone                         | Gensat |
| Tg(Crhr1-EGFP)FL247Gsat        | EGFP | Crhr1        | corticotropin releasing hormone receptor 1              | Gensat |
| Tg(Crim1-EGFP)LA7Gsat          | EGFP | Crim1        | cysteine rich transmembrane BMP regulator 1 (choi       | Gensat |
| Tg(Crip2-EGFP)KQ28Gsat         | EGFP | Crip2        | cysteine rich protein 2                                 | Gensat |
| Tg(Crkl-EGFP)DG143Gsat         | EGFP | Crkl         | v-crk sarcoma virus CT10 oncogene homolog (avia         | Gensat |
| Tg(Cryab-EGFP)HS240Gsat        | EGFP | Cryab        | crystallin, alpha B                                     | Gensat |
| Tg(Crym-EGFP)GF82Gsat          | EGFP | Crym         | crystallin, mu                                          | Gensat |
| Tg(Csdc2-EGFP)NW255Gsat        | EGFP | Csdc2        | cold shock domain containing C2, RNA binding            | Gensat |
| Tg(Csf2rb2-EGFP)JF334Gsat      | EGFP | Csf2rb2      | colony stimulating factor 2 receptor, beta 2, low-affir | Gensat |
| Tg(Cst3-EGFP)PE159Gsat         | EGFP | Cst3         | cystatin C                                              | Gensat |
| Tg(Ctgf-EGFP)FX156Gsat         | EGFP | Ctgf         | connective tissue growth factor                         | Gensat |
| Tg(Ctxn1-EGFP)KS385Gsat        | EGFP | Ctxn1        | cortexin 1                                              | Gensat |
| Tg(Cxcl11-EGFP)HE40Gsat        | EGFP | Cxcl11       | chemokine (C-X-C motif) ligand 11                       | Gensat |
| Tg(Cxcl12-EGFP)DD121Gsat       | EGFP | Cxcl12       | chemokine (C-X-C motif) ligand 12                       | Gensat |
| Tg(Cxcl13-EGFP)SE33Gsat        | EGFP | Cxcl13       | chemokine (C-X-C motif) ligand 13                       | Gensat |
| Tg(Cxcl14-EGFP)PS15Gsat        | EGFP | Cxcl14       | chemokine (C-X-C motif) ligand 14                       | Gensat |
| Tg(Cxcr4-EGFP)CD73Gsat         | EGFP | Cxcr4        | chemokine (C-X-C motif) receptor 4                      | Gensat |
| Tg(Cxcr7-EGFP)HE28Gsat         | EGFP | Cxcr7        | chemokine (C-X-C motif) receptor 7                      | Gensat |
| Tg(Cxxc4-EGFP)LM190Gsat        | EGFP | Cxxc4        | CXXC finger 4                                           | Gensat |
| Tg(Cyb561-EGFP)JI88Gsat        | EGFP | Cyb561       | cytochrome b-561                                        | Gensat |
| Tg(Cyfp2-EGFP)IN64Gsat         | EGFP | Cyfp2        | cytoplasmic FMR1 interacting protein 2                  | Gensat |
| Tg(Cyp19a1-EGFP)FC116Gsat      | EGFP | Cyp19a1      | cytochrome P450, family 19, subfamily a, polypepti      | Gensat |
| Tg(Cyr61-EGFP)HA63Gsat         | EGFP | Cyr61        | cysteine rich protein 61                                | Gensat |
| Tg(D0H4S114-EGFP)GY63Gsat      | EGFP | D0H4S114     | DNA segment, human D4S114                               | Gensat |
| Tg(D630045J12Rik-EGFP)DH81Gsat | EGFP | D630045J12Ri | RIKEN cDNA D630045J12 gene                              | Gensat |
| Tg(D6Wsu116e-EGFP)JNG38Gsat    | EGFP | D6Wsu116e    | DNA segment, Chr 6, Wayne State University 116, (       | Gensat |
| Tg(D8Ertd738e-EGFP)JM357Gsat   | EGFP | D8Ertd738e   | DNA segment, Chr 8, ERATO Doi 738, expressed            | Gensat |
| Tg(Dact2-EGFP)LY173Gsat        | EGFP | Dact2        | dapper homolog 2, antagonist of beta-catenin (xenc      | Gensat |
| Tg(Dap3-EGFP)EI119Gsat         | EGFP | Dap3         | death associated protein 3                              | Gensat |
| Tg(Dbh-EGFP)FI99Gsat           | EGFP | Dbh          | dopamine beta hydroxylase                               | Gensat |
| Tg(Dbi-EGFP)IH386Gsat          | EGFP | Dbi          | diazepam binding inhibitor                              | Gensat |
| Tg(Dbp-EGFP)LP35Gsat           | EGFP | Dbp          | D site albumin promoter binding protein                 | Gensat |
| Tg(Dcdc2a-EGFP)JC158Gsat       | EGFP | Dcdc2a       | doublecortin domain containing 2a                       | Gensat |
| Tg(Dclk3-EGFP)QH20Gsat         | EGFP | Dclk3        | doublecortin-like kinase 3                              | Gensat |
| Tg(Dcn-EGFP)PA28Gsat           | EGFP | Dcn          | decorin                                                 | Gensat |
| Tg(Dct-EGFP)NY2Gsat            | EGFP | Dct          | dopachrome tautomerase                                  | Gensat |
| Tg(Dctn1-EGFP)LT120Gsat        | EGFP | Dctn1        | dynactin 1                                              | Gensat |
| Tg(Dcx-EGFP)BJ224Gsat          | EGFP | Dcx          | doublecortin                                            | Gensat |



|                           |      |         |                                                                       |        |
|---------------------------|------|---------|-----------------------------------------------------------------------|--------|
| Tg(Ddc-EGFP)GW36Gsat      | EGFP | Ddc     | dopa decarboxylase                                                    | Gensat |
| Tg(Ddit4l-EGFP)QS32Gsat   | EGFP | Ddit4l  | DNA-damage-inducible transcript 4-like                                | Gensat |
| Tg(Ddr1-EGFP)JD143Gsat    | EGFP | Ddr1    | discoidin domain receptor family, member 1                            | Gensat |
| Tg(Dgcr14-EGFP)BM11Gsat   | EGFP | Dgcr14  | DiGeorge syndrome critical region gene 14                             | Gensat |
| Tg(Dhcr24-EGFP)JK95Gsat   | EGFP | Dhcr24  | 24-dehydrocholesterol reductase                                       | Gensat |
| Tg(Dhrs3-EGFP)FE280Gsat   | EGFP | Dhrs3   | dehydrogenase/reductase (SDR family) member 3                         | Gensat |
| Tg(Dkk3-EGFP)HS4Gsat      | EGFP | Dkk3    | dickkopf homolog 3 (Xenopus laevis)                                   | Gensat |
| Tg(Dlg4-EGFP)FQ389Gsat    | EGFP | Dlg4    | discs, large homolog 4 (Drosophila)                                   | Gensat |
| Tg(Dlk1-EGFP)LA118Gsat    | EGFP | Dlk1    | delta-like 1 homolog (Drosophila)                                     | Gensat |
| Tg(Dlx2-EGFP)HS66Gsat     | EGFP | Dlx2    | distal-less homeobox 2                                                | Gensat |
| Tg(Dlx3-EGFP)NH112Gsat    | EGFP | Dlx3    | distal-less homeobox 3                                                | Gensat |
| Tg(Dlx5-EGFP)FR184Gsat    | EGFP | Dlx5    | distal-less homeobox 5                                                | Gensat |
| Tg(Dlx6-EGFP)HX45Gsat     | EGFP | Dlx6    | distal-less homeobox 6                                                | Gensat |
| Tg(Dmbx1-EGFP)FD99Gsat    | EGFP | Dmbx1   | diencephalon/mesencephalon homeobox 1                                 | Gensat |
| Tg(Dmtf1-EGFP)L83Gsat     | EGFP | Dmtf1   | cyclin D binding myb-like transcription factor 1                      | Gensat |
| Tg(Dnajc12-EGFP)NB148Gsat | EGFP | Dnajc12 | DnaJ (Hsp40) homolog, subfamily C, member 12                          | Gensat |
| Tg(Dnm2-EGFP)BL98Gsat     | EGFP | Dnm2    | dynamin 2                                                             | Gensat |
| Tg(Dnmt1-EGFP)CJ101Gsat   | EGFP | Dnmt1   | DNA methyltransferase (cytosine-5) 1                                  | Gensat |
| Tg(Dnmt3a-EGFP)DH58Gsat   | EGFP | Dnmt3a  | DNA methyltransferase 3A                                              | Gensat |
| Tg(Doc2a-EGFP)JK151Gsat   | EGFP | Doc2a   | double C2, alpha                                                      | Gensat |
| Tg(Doc2g-EGFP)QC79Gsat    | EGFP | Doc2g   | double C2, gamma                                                      | Gensat |
| Tg(Drd1a-EGFP)X60Gsat     | EGFP | Drd1a   | dopamine receptor D1A                                                 | Gensat |
| Tg(Drd2-EGFP)S118Gsat     | EGFP | Drd2    | dopamine receptor D2                                                  | Gensat |
| Tg(Drd4-EGFP)W18Gsat      | EGFP | Drd4    | dopamine receptor D4                                                  | Gensat |
| Tg(Dsp-EGFP)IL399Gsat     | EGFP | Dsp     | desmoplakin                                                           | Gensat |
| Tg(Dtx4-EGFP)HA102Gsat    | EGFP | Dtx4    | deltex 4 homolog (Drosophila)                                         | Gensat |
| Tg(Dtymk-EGFP)JJ39Gsat    | EGFP | Dtymk   | deoxythymidylate kinase                                               | Gensat |
| Tg(Dusp1-EGFP)GD23Gsat    | EGFP | Dusp1   | dual specificity phosphatase 1                                        | Gensat |
| Tg(Dusp14-EGFP)HK400Gsat  | EGFP | Dusp14  | dual specificity phosphatase 14                                       | Gensat |
| Tg(Dusp16-EGFP)JG166Gsat  | EGFP | Dusp16  | dual specificity phosphatase 16                                       | Gensat |
| Tg(Dusp3-EGFP)HM43Gsat    | EGFP | Dusp3   | dual specificity phosphatase 3 (vaccinia virus phosphatase)           | Gensat |
| Tg(Dusp5-EGFP)HM74Gsat    | EGFP | Dusp5   | dual specificity phosphatase 5                                        | Gensat |
| Tg(Dyrk1a-EGFP)JF4Gsat    | EGFP | Dyrk1a  | dual-specificity tyrosine-(Y)-phosphorylation regulator 1             | Gensat |
| Tg(Dyx1c1-EGFP)JC106Gsat  | EGFP | Dyx1c1  | dyslexia susceptibility 1 candidate 1 homolog (human)                 | Gensat |
| Tg(E2f8-EGFP)GX54Gsat     | EGFP | E2f8    | E2F transcription factor 8                                            | Gensat |
| Tg(Ebf2-EGFP)FB58Gsat     | EGFP | Ebf2    | early B-cell factor 2                                                 | Gensat |
| Tg(Ebf3-EGFP)LP183Gsat    | EGFP | Ebf3    | early B-cell factor 3                                                 | Gensat |
| Tg(Ecel1-EGFP)NU146Gsat   | EGFP | Ecel1   | endothelin converting enzyme-like 1                                   | Gensat |
| Tg(Ednrb-EGFP)EP59Gsat    | EGFP | Ednrb   | endothelin receptor type B                                            | Gensat |
| Tg(Eed-EGFP)LZ55Gsat      | EGFP | Eed     | embryonic ectoderm development                                        | Gensat |
| Tg(Eef1a1-EGFP)LX73Gsat   | EGFP | Eef1a1  | eukaryotic translation elongation factor 1 alpha 1                    | Gensat |
| Tg(Efna1-EGFP)IM260Gsat   | EGFP | Efna1   | ephrin A1                                                             | Gensat |
| Tg(Efnb1-EGFP)GH241Gsat   | EGFP | Efnb1   | ephrin B1                                                             | Gensat |
| Tg(Efnb2-EGFP)GY92Gsat    | EGFP | Efnb2   | ephrin B2                                                             | Gensat |
| Tg(Efnb3-EGFP)JZ110Gsat   | EGFP | Efnb3   | ephrin B3                                                             | Gensat |
| Tg(Efr3a-EGFP)HV155Gsat   | EGFP | Efr3a   | EFR3 homolog A (S. cerevisiae)                                        | Gensat |
| Tg(Efs-EGFP)JR5Gsat       | EGFP | Efs     | embryonal Fyn-associated substrate                                    | Gensat |
| Tg(Egr1-EGFP)GO90Gsat     | EGFP | Egr1    | early growth response 1                                               | Gensat |
| Tg(Eif1-EGFP)LC125Gsat    | EGFP | Eif1    | eukaryotic translation initiation factor 1                            | Gensat |
| Tg(Eif1ax-EGFP)MC114Gsat  | EGFP | Eif1ax  | eukaryotic translation initiation factor 1A, X-linked                 | Gensat |
| Tg(Eif3h-EGFP)FK202Gsat   | EGFP | Eif3h   | eukaryotic translation initiation factor 3, subunit H                 | Gensat |
| Tg(Eif4e3-EGFP)GT120Gsat  | EGFP | Eif4e3  | eukaryotic translation initiation factor 4E member 3                  | Gensat |
| Tg(Eif4g2-EGFP)KN161Gsat  | EGFP | Eif4g2  | eukaryotic translation initiation factor 4, gamma 2                   | Gensat |
| Tg(Elavl3-EGFP)CS35Gsat   | EGFP | Elavl3  | ELAV (embryonic lethal, abnormal vision, Drosophila)                  | Gensat |
| Tg(Elavl4-EGFP)CZ64Gsat   | EGFP | Elavl4  | ELAV (embryonic lethal, abnormal vision, Drosophila)                  | Gensat |
| Tg(Elfn1-EGFP)OC35Gsat    | EGFP | Elfn1   | leucine rich repeat and fibronectin type III, extracellular domain 1  | Gensat |
| Tg(Ell3-EGFP)OS49Gsat     | EGFP | Ell3    | elongation factor RNA polymerase II-like 3                            | Gensat |
| Tg(Elov6-EGFP)QR5Gsat     | EGFP | Elov6   | ELOVL family member 6, elongation of long chain fatty acid synthase 6 | Gensat |
| Tg(Emp1-EGFP)HY140Gsat    | EGFP | Emp1    | epithelial membrane protein 1                                         | Gensat |
| Tg(Emx1-EGFP)FJ56Gsat     | EGFP | Emx1    | empty spiracles homolog 1 (Drosophila)                                | Gensat |
| Tg(Emx2-EGFP)FI206Gsat    | EGFP | Emx2    | empty spiracles homolog 2 (Drosophila)                                | Gensat |
| Tg(En1-EGFP)BH408Gsat     | EGFP | En1     | engrailed 1                                                           | Gensat |
| Tg(Enc1-EGFP)FD162Gsat    | EGFP | Enc1    | ectodermal-neural cortex 1                                            | Gensat |
| Tg(Eno1-EGFP)FC195Gsat    | EGFP | Eno1    | enolase 1, alpha non-neuron                                           | Gensat |
| Tg(Eno2-EGFP)DQ50Gsat     | EGFP | Eno2    | enolase 2, gamma neuronal                                             | Gensat |
| Tg(Enpp2-EGFP)OR56Gsat    | EGFP | Enpp2   | ectonucleotide pyrophosphatase/phosphodiesterase 2                    | Gensat |
| Tg(Entpd4-EGFP)CW191Gsat  | EGFP | Entpd4  | ectonucleoside triphosphate diphosphohydrolase 4                      | Gensat |
| Tg(Eomes-EGFP)DQ10Gsat    | EGFP | Eomes   | eomesodermin homolog (Xenopus laevis)                                 | Gensat |
| Tg(Epha2-EGFP)DE51Gsat    | EGFP | Epha2   | Eph receptor A2                                                       | Gensat |
| Tg(Epha4-EGFP)EO137Gsat   | EGFP | Epha4   | Eph receptor A4                                                       | Gensat |
| Tg(Epha7-EGFP)FX17Gsat    | EGFP | Epha7   | Eph receptor A7                                                       | Gensat |
| Tg(Epha8-EGFP)GK250Gsat   | EGFP | Epha8   | Eph receptor A8                                                       | Gensat |
| Tg(Eps8l2-EGFP)LY20Gsat   | EGFP | Eps8l2  | EPS8-like 2                                                           | Gensat |
| Tg(Epyc-EGFP)DA4Gsat      | EGFP | Epyc    | epiphycan                                                             | Gensat |

|                                  |      |           |                                                         |        |
|----------------------------------|------|-----------|---------------------------------------------------------|--------|
| Tg(Erp29-EGFP)KX108Gsat          | EGFP | Erp29     | endoplasmic reticulum protein 29                        | Gensat |
| Tg(Esr2-EGFP)ID169Gsat           | EGFP | Esr2      | estrogen receptor 2 (beta)                              | Gensat |
| Tg(Esy3-EGFP)LJ63Gsat            | EGFP | Esy3      | extended synaptotagmin-like protein 3                   | Gensat |
| Tg(Etv1-EGFP)BZ192Gsat           | EGFP | Etv1      | ets variant gene 1                                      | Gensat |
| Tg(Etv5-EGFP)IH16Gsat            | EGFP | Etv5      | ets variant gene 5                                      | Gensat |
| Tg(F2r-EGFP)NA168Gsat            | EGFP | F2r       | coagulation factor II (thrombin) receptor               | Gensat |
| Tg(Fabp3-EGFP)KR262Gsat          | EGFP | Fabp3     | fatty acid binding protein 3, muscle and heart          | Gensat |
| Tg(Fabp7-EGFP)K48Gsat            | EGFP | Fabp7     | fatty acid binding protein 7, brain                     | Gensat |
| Tg(Fam131a-EGFP)QX28Gsat         | EGFP | Fam131a   | family with sequence similarity 131, member A           | Gensat |
| Tg(Fam171b-EGFP)HX157Gsat        | EGFP | Fam171b   | family with sequence similarity 171, member B           | Gensat |
| Tg(Fam40b-EGFP)JH84Gsat          | EGFP | Fam40b    | family with sequence similarity 40, member B            | Gensat |
| Tg(Fam65b-EGFP)LS245Gsat         | EGFP | Fam65b    | family with sequence similarity 65, member B            | Gensat |
| Tg(6430514L14Rik-EGFP)95Gsat: NA | EGFP | Fam81a    | family with sequence similarity 81, member A            | Gensat |
| Tg(Fam81a-EGFP)HT95Gsat          | EGFP | Fam81a    | family with sequence similarity 81, member A            | Gensat |
| Tg(Fam84a-EGFP)KR114Gsat         | EGFP | Fam84a    | family with sequence similarity 84, member A            | Gensat |
| Tg(Fbx15-EGFP)IL133Gsat          | EGFP | Fbx15     | F-box and leucine-rich repeat protein 5                 | Gensat |
| Tg(Fbxo32-EGFP)IM138Gsat         | EGFP | Fbxo32    | F-box protein 32                                        | Gensat |
| Tg(Fcgr1g-EGFP)HY299Gsat         | EGFP | Fcgr1g    | Fc receptor, IgE, high affinity I, gamma polypeptide    | Gensat |
| Tg(Fev-EGFP)MT45Gsat             | EGFP | Fev       | FEV (ETS oncogene family)                               | Gensat |
| Tg(Fezf1-EGFP)LK300Gsat          | EGFP | Fezf1     | Fez family zinc finger 1                                | Gensat |
| Tg(Fezf2-EGFP)CO61Gsat           | EGFP | Fezf2     | Fez family zinc finger 2                                | Gensat |
| Tg(Fgf1-EGFP)IT31Gsat            | EGFP | Fgf1      | fibroblast growth factor 1                              | Gensat |
| Tg(Fgf13-EGFP)IA195Gsat          | EGFP | Fgf13     | fibroblast growth factor 13                             | Gensat |
| Tg(Fgf17-EGFP)PX38Gsat           | EGFP | Fgf17     | fibroblast growth factor 17                             | Gensat |
| Tg(Fgf3-EGFP)LM102Gsat           | EGFP | Fgf3      | fibroblast growth factor 3                              | Gensat |
| Tg(Fgfr1-EGFP)GP338Gsat          | EGFP | Fgfr1     | fibroblast growth factor receptor 1                     | Gensat |
| Tg(Fgfr3-EGFP)KB81Gsat           | EGFP | Fgfr3     | fibroblast growth factor receptor 3                     | Gensat |
| Tg(Fhdc1-EGFP)SB102Gsat          | EGFP | Fhdc1     | FH2 domain containing 1                                 | Gensat |
| Tg(Fign-EGFP)PD77Gsat            | EGFP | Fign      | fidgetin                                                | Gensat |
| Tg(Fkbp1b-EGFP)QT127Gsat         | EGFP | Fkbp1b    | FK506 binding protein 1b                                | Gensat |
| Tg(Fkbp2-EGFP)DP236Gsat          | EGFP | Fkbp2     | FK506 binding protein 2                                 | Gensat |
| Tg(Fkbp3-EGFP)KU36Gsat           | EGFP | Fkbp3     | FK506 binding protein 3                                 | Gensat |
| Tg(Flrt1-EGFP)IM472Gsat          | EGFP | Flrt1     | fibronectin leucine rich transmembrane protein 1        | Gensat |
| Tg(Fmr1-EGFP)HP76Gsat            | EGFP | Fmr1      | fragile X mental retardation syndrome 1 homolog         | Gensat |
| Tg(Fos-EGFP)KR563Gsat            | EGFP | Fos       | FBJ osteosarcoma oncogene                               | Gensat |
| Tg(Foxi1-EGFP)IC243Gsat          | EGFP | Foxi1     | forkhead box I1                                         | Gensat |
| Tg(Foxi2-EGFP)HX217Gsat          | EGFP | Foxi2     | forkhead box I2                                         | Gensat |
| Tg(Foxm1-EGFP)EU95Gsat           | EGFP | Foxm1     | forkhead box M1                                         | Gensat |
| Tg(Foxp4-EGFP)CE54Gsat           | EGFP | Foxp4     | forkhead box P4                                         | Gensat |
| Tg(Frat1-EGFP)JY134Gsat          | EGFP | Frat1     | frequently rearranged in advanced T-cell lymphoma       | Gensat |
| Tg(Fryl-EGFP)IF301Gsat           | EGFP | Fryl      | furry homolog-like (Drosophila)                         | Gensat |
| Tg(Frzb-EGFP)MK48Gsat            | EGFP | Frzb      | frizzled-related protein                                | Gensat |
| Tg(Fxyd6-EGFP)FT246Gsat          | EGFP | Fxyd6     | FXYD domain-containing ion transport regulator 6        | Gensat |
| Tg(Fxyd7-EGFP)JR145Gsat          | EGFP | Fxyd7     | FXYD domain-containing ion transport regulator 7        | Gensat |
| Tg(Fzd10-EGFP)KP95Gsat           | EGFP | Fzd10     | frizzled homolog 10 (Drosophila)                        | Gensat |
| Tg(Fzd2-EGFP)JU90Gsat            | EGFP | Fzd2      | frizzled homolog 2 (Drosophila)                         | Gensat |
| Tg(Fzd3-EGFP)KH6Gsat             | EGFP | Fzd3      | frizzled homolog 3 (Drosophila)                         | Gensat |
| Tg(Fzd5-EGFP)LK279Gsat           | EGFP | Fzd5      | frizzled homolog 5 (Drosophila)                         | Gensat |
| Tg(Fzd8-EGFP)JL166Gsat           | EGFP | Fzd8      | frizzled homolog 8 (Drosophila)                         | Gensat |
| Tg(Gaa-EGFP)CF11Gsat             | EGFP | Gaa       | glucosidase, alpha, acid                                | Gensat |
| Tg(Gabarapl1-EGFP)KY110Gsat      | EGFP | Gabarapl1 | gamma-aminobutyric acid (GABA) A receptor-assoc         | Gensat |
| Tg(Gabrg1-EGFP)CX126Gsat         | EGFP | Gabrg1    | gamma-aminobutyric acid (GABA) A receptor, subu         | Gensat |
| Tg(Gabrr3-EGFP)BY285Gsat         | EGFP | Gabrr3    | gamma-aminobutyric acid (GABA) receptor, rho 3          | Gensat |
| Tg(Gad2-EGFP)DJ31Gsat            | EGFP | Gad2      | glutamic acid decarboxylase 2                           | Gensat |
| Tg(Gal-EGFP)HX109Gsat            | EGFP | Gal       | galanin                                                 | Gensat |
| Tg(Galnt9-EGFP)IH476Gsat         | EGFP | Galnt9    | UDP-N-acetyl-alpha-D-galactosamine:polypeptide t        | Gensat |
| Tg(Galr3-EGFP)KS77Gsat           | EGFP | Galr3     | galanin receptor 3                                      | Gensat |
| Tg(Gap43-EGFP)DS120Gsat          | EGFP | Gap43     | growth associated protein 43                            | Gensat |
| Tg(Gas1-EGFP)JT116Gsat           | EGFP | Gas1      | growth arrest specific 1                                | Gensat |
| Tg(Gbx2-EGFP)KZ184Gsat           | EGFP | Gbx2      | gastrulation brain homeobox 2                           | Gensat |
| Tg(Gch1-EGFP)GU68Gsat            | EGFP | Gch1      | GTP cyclohydrolase 1                                    | Gensat |
| Tg(Gchfr-EGFP)KU71Gsat           | EGFP | Gchfr     | GTP cyclohydrolase I feedback regulator                 | Gensat |
| Tg(Gck-EGFP)NH76Gsat             | EGFP | Gck       | glucokinase                                             | Gensat |
| Tg(Gcm2-EGFP)FG26Gsat            | EGFP | Gcm2      | glial cells missing homolog 2 (Drosophila)              | Gensat |
| Tg(Gda-EGFP)LH56Gsat             | EGFP | Gda       | guanine deaminase                                       | Gensat |
| Tg(Gdf10-EGFP)GU145Gsat          | EGFP | Gdf10     | growth differentiation factor 10                        | Gensat |
| Tg(Gdnf-EGFP)KP206Gsat           | EGFP | Gdnf      | glial cell line derived neurotrophic factor             | Gensat |
| Tg(Gfap-EGFP)CV94Gsat            | EGFP | Gfap      | glial fibrillary acidic protein                         | Gensat |
| Tg(Gfra2-EGFP)QX53Gsat           | EGFP | Gfra2     | glial cell line derived neurotrophic factor family rece | Gensat |
| Tg(Ghsr-EGFP)KZ65Gsat            | EGFP | Ghsr      | growth hormone secretagogue receptor                    | Gensat |
| Tg(Gipc2-EGFP)QS111Gsat          | EGFP | Gipc2     | GIPC PDZ domain containing family, member 2             | Gensat |
| Tg(Gja1-EGFP)KB40Gsat            | EGFP | Gja1      | gap junction protein, alpha 1                           | Gensat |
| Tg(Gjc1-EGFP)JY80Gsat            | EGFP | Gjc1      | gap junction protein, gamma 1                           | Gensat |
| Tg(Gjd2-EGFP)JM16Gsat            | EGFP | Gjd2      | gap junction protein, delta 2                           | Gensat |

|                           |      |         |                                                       |        |
|---------------------------|------|---------|-------------------------------------------------------|--------|
| Tg(Gldc-EGFP)FE205Gsat    | EGFP | Gldc    | glycine decarboxylase                                 | Gensat |
| Tg(Gli1-EGFP)DM197Gsat    | EGFP | Gli1    | GLI-Kruppel family member GLI1                        | Gensat |
| Tg(Glrb-EGFP)DG257Gsat    | EGFP | Glrb    | glycine receptor, beta subunit                        | Gensat |
| Tg(Gls-EGFP)Y16Gsat       | EGFP | Gls     | glutaminase                                           | Gensat |
| Tg(Glt25d2-EGFP)BN20Gsat  | EGFP | Glt25d2 | glycosyltransferase 25 domain containing 2            | Gensat |
| Tg(Gnb4-EGFP)LE63Gsat     | EGFP | Gnb4    | guanine nucleotide binding protein (G protein), beta  | Gensat |
| Tg(Gng10-EGFP)GV30Gsat    | EGFP | Gng10   | guanine nucleotide binding protein (G protein), gam   | Gensat |
| Tg(Gng12-EGFP)JK39Gsat    | EGFP | Gng12   | guanine nucleotide binding protein (G protein), gam   | Gensat |
| Tg(Gng13-EGFP)GI206Gsat   | EGFP | Gng13   | guanine nucleotide binding protein (G protein), gam   | Gensat |
| Tg(Gng3-EGFP)HK208Gsat    | EGFP | Gng3    | guanine nucleotide binding protein (G protein), gam   | Gensat |
| Tg(Gng4-EGFP)HK227Gsat    | EGFP | Gng4    | guanine nucleotide binding protein (G protein), gam   | Gensat |
| Tg(Gng5-EGFP)GX164Gsat    | EGFP | Gng5    | guanine nucleotide binding protein (G protein), gam   | Gensat |
| Tg(Gng7-EGFP)FG220Gsat    | EGFP | Gng7    | guanine nucleotide binding protein (G protein), gam   | Gensat |
| Tg(Gpc4-EGFP)HZ284Gsat    | EGFP | Gpc4    | glypican 4                                            | Gensat |
| Tg(Gpm6a-EGFP)HS183Gsat   | EGFP | Gpm6a   | glycoprotein m6a                                      | Gensat |
| Tg(Gpr12-EGFP)LD58Gsat    | EGFP | Gpr12   | G-protein coupled receptor 12                         | Gensat |
| Tg(Gpr139-EGFP)HF108Gsat  | EGFP | Gpr139  | G protein-coupled receptor 139                        | Gensat |
| Tg(Gpr151-EGFP)KS142Gsat  | EGFP | Gpr151  | G protein-coupled receptor 151                        | Gensat |
| Tg(Gpr155-EGFP)PF60Gsat   | EGFP | Gpr155  | G protein-coupled receptor 155                        | Gensat |
| Tg(Gpr165-EGFP)LK55Gsat   | EGFP | Gpr165  | G protein-coupled receptor 165                        | Gensat |
| Tg(Gpr21-EGFP)FY319Gsat   | EGFP | Gpr21   | G protein-coupled receptor 21                         | Gensat |
| Tg(Gpr26-EGFP)QX19Gsat    | EGFP | Gpr26   | G protein-coupled receptor 26                         | Gensat |
| Tg(Gpr30-EGFP)LC357Gsat   | EGFP | Gpr30   | G protein-coupled receptor 30                         | Gensat |
| Tg(Gpr3711-EGFP)FY235Gsat | EGFP | Gpr3711 | G protein-coupled receptor 37-like 1                  | Gensat |
| Tg(Gpr4-EGFP)GU23Gsat     | EGFP | Gpr4    | G protein-coupled receptor 4                          | Gensat |
| Tg(Gpr56-EGFP)HC35Gsat    | EGFP | Gpr56   | G protein-coupled receptor 56                         | Gensat |
| Tg(Gpr6-EGFP)LS39Gsat     | EGFP | Gpr6    | G protein-coupled receptor 6                          | Gensat |
| Tg(Gpr68-EGFP)IU33Gsat    | EGFP | Gpr68   | G protein-coupled receptor 68                         | Gensat |
| Tg(Gpr83-EGFP)DV46Gsat    | EGFP | Gpr83   | G protein-coupled receptor 83                         | Gensat |
| Tg(Gpr88-EGFP)GQ81Gsat    | EGFP | Gpr88   | G-protein coupled receptor 88                         | Gensat |
| Tg(Gprc5b-EGFP)QN46Gsat   | EGFP | Gprc5b  | G protein-coupled receptor, family C, group 5, mem    | Gensat |
| Tg(Gprc5c-EGFP)JU90Gsat   | EGFP | Gprc5c  | G protein-coupled receptor, family C, group 5, mem    | Gensat |
| Tg(Gprin3-EGFP)HV112Gsat  | EGFP | Gprin3  | GPRIN family member 3                                 | Gensat |
| Tg(Gpsm1-EGFP)JC29Gsat    | EGFP | Gpsm1   | G-protein signalling modulator 1 (AGS3-like, C. ele   | Gensat |
| Tg(Gria2-EGFP)DP5Gsat     | EGFP | Gria2   | glutamate receptor, ionotropic, AMPA2 (alpha 2)       | Gensat |
| Tg(Grid2ip-EGFP)JB243Gsat | EGFP | Grid2ip | glutamate receptor, ionotropic, delta 2 (Grid2) inter | Gensat |
| Tg(Grin1-EGFP)OH37Gsat    | EGFP | Grin1   | glutamate receptor, ionotropic, NMDA1 (zeta 1)        | Gensat |
| Tg(Grm1-EGFP)BC25Gsat     | EGFP | Grm1    | glutamate receptor, metabotropic 1                    | Gensat |
| Tg(Grm4-EGFP)HY216Gsat    | EGFP | Grm4    | glutamate receptor, metabotropic 4                    | Gensat |
| Tg(Grp-EGFP)DV197Gsat     | EGFP | Grp     | gastrin releasing peptide                             | Gensat |
| Tg(Grpr-EGFP)PZ62Gsat     | EGFP | Grpr    | gastrin releasing peptide receptor                    | Gensat |
| Tg(Gsc2-EGFP)AG144Gsat    | EGFP | Gsc2    | goosecoid homeobox 2                                  | Gensat |
| Tg(Gsn-EGFP)EQ88Gsat      | EGFP | Gsn     | gelsolin                                              | Gensat |
| Tg(Gsx1-EGFP)IL164Gsat    | EGFP | Gsx1    | GS homeobox 1                                         | Gensat |
| Tg(Gsx2-EGFP)HY315Gsat    | EGFP | Gsx2    | GS homeobox 2                                         | Gensat |
| Tg(Gtf2i-EGFP)IH6Gsat     | EGFP | Gtf2i   | general transcription factor II I                     | Gensat |
| Tg(Gucy1a3-EGFP)HM112Gsat | EGFP | Gucy1a3 | guanylate cyclase 1, soluble, alpha 3                 | Gensat |
| Tg(Gucy2c-EGFP)JX44Gsat   | EGFP | Gucy2c  | guanylate cyclase 2c                                  | Gensat |
| Tg(H2-D1-EGFP)FP313Gsat   | EGFP | H2-D1   | histocompatibility 2, D region locus 1                | Gensat |
| Tg(H2-T22-EGFP)PC55Gsat   | EGFP | H2-T22  | histocompatibility 2, T region locus 22               | Gensat |
| Tg(H2-T23-EGFP)NZ55Gsat   | EGFP | H2-T23  | histocompatibility 2, T region locus 23               | Gensat |
| Tg(H2afz-EGFP)LJ201Gsat   | EGFP | H2afz   | H2A histone family, member Z                          | Gensat |
| Tg(Hap1-EGFP)HD56Gsat     | EGFP | Hap1    | huntingtin-associated protein 1                       | Gensat |
| Tg(Hbegf-EGFP)GT186Gsat   | EGFP | Hbegf   | heparin-binding EGF-like growth factor                | Gensat |
| Tg(Hcfc1-EGFP)DV155Gsat   | EGFP | Hcfc1   | host cell factor C1                                   | Gensat |
| Tg(Hcn2-EGFP)EM66Gsat     | EGFP | Hcn2    | hyperpolarization-activated, cyclic nucleotide-gated  | Gensat |
| Tg(Hcn4-EGFP)JK158Gsat    | EGFP | Hcn4    | hyperpolarization-activated, cyclic nucleotide-gated  | Gensat |
| Tg(Hcrt-EGFP)NY120Gsat    | EGFP | Hcrt    | hypocretin                                            | Gensat |
| Tg(Hcrt1-EGFP)KP68Gsat    | EGFP | Hcrt1   | hypocretin (orexin) receptor 1                        | Gensat |
| Tg(Hdac11-EGFP)HO220Gsat  | EGFP | Hdac11  | histone deacetylase 11                                | Gensat |
| Tg(Hdc-EGFP)DW63Gsat      | EGFP | Hdc     | histidine decarboxylase                               | Gensat |
| Tg(Herc3-EGFP)EB112Gsat   | EGFP | Herc3   | hect domain and RLD 3                                 | Gensat |
| Tg(Hes1-EGFP)U62Gsat      | EGFP | Hes1    | hairy and enhancer of split 1 (Drosophila)            | Gensat |
| Tg(Hes5-EGFP)CV50Gsat     | EGFP | Hes5    | hairy and enhancer of split 5 (Drosophila)            | Gensat |
| Tg(Hey1-EGFP)D40Gsat      | EGFP | Hey1    | hairy/enhancer-of-split related with YRPW motif 1     | Gensat |
| Tg(Hey2-EGFP)IF165Gsat    | EGFP | Hey2    | hairy/enhancer-of-split related with YRPW motif 2     | Gensat |
| Tg(Heyl-EGFP)IC178Gsat    | EGFP | Heyl    | hairy/enhancer-of-split related with YRPW motif-like  | Gensat |
| Tg(Hgs-EGFP)DS5Gsat       | EGFP | Hgs     | HGF-regulated tyrosine kinase substrate               | Gensat |
| Tg(Hira-EGFP)LC207Gsat    | EGFP | Hira    | histone cell cycle regulation defective homolog A (S  | Gensat |
| Tg(Hmgn2-EGFP)G2Gsat      | EGFP | Hmgn2   | high mobility group nucleosomal binding domain 2      | Gensat |
| Tg(Hmgn3-EGFP)FU5Gsat     | EGFP | Hmgn3   | high mobility group nucleosomal binding domain 3      | Gensat |
| Tg(Hmx3-EGFP)HN154Gsat    | EGFP | Hmx3    | H6 homeobox 3                                         | Gensat |
| Tg(Hnmpab-EGFP)CZ184Gsat  | EGFP | Hnmpab  | heterogeneous nuclear ribonucleoprotein A/B           | Gensat |
| Tg(Homer1-EGFP)LS179Gsat  | EGFP | Homer1  | homer homolog 1 (Drosophila)                          | Gensat |

|                           |      |         |                                                          |        |
|---------------------------|------|---------|----------------------------------------------------------|--------|
| Tg(Homer3-EGFP)OH81Gsat   | EGFP | Homer3  | homer homolog 3 (Drosophila)                             | Gensat |
| Tg(Hoxa5-EGFP)IX16Gsat    | EGFP | Hoxa5   | homeobox A5                                              | Gensat |
| Tg(Hoxd10-EGFP)LT174Gsat  | EGFP | Hoxd10  | homeobox D10                                             | Gensat |
| Tg(Hpcal1-EGFP)FJ134Gsat  | EGFP | Hpcal1  | hippocalcin-like 1                                       | Gensat |
| Tg(Hpcal4-EGFP)IZ36Gsat   | EGFP | Hpcal4  | hippocalcin-like 4                                       | Gensat |
| Tg(Hrasls-EGFP)GC47Gsat   | EGFP | Hrasls  | HRAS-like suppressor                                     | Gensat |
| Tg(Hrh2-EGFP)HL170Gsat    | EGFP | Hrh2    | histamine receptor H2                                    | Gensat |
| Tg(Hspa12a-EGFP)CL64Gsat  | EGFP | Hspa12a | heat shock protein 12A                                   | Gensat |
| Tg(Hspb8-EGFP)HI62Gsat    | EGFP | Hspb8   | heat shock protein 8                                     | Gensat |
| Tg(Htr1a-EGFP)IE193Gsat   | EGFP | Htr1a   | 5-hydroxytryptamine (serotonin) receptor 1A              | Gensat |
| Tg(Htr1b-EGFP)FT68Gsat    | EGFP | Htr1b   | 5-hydroxytryptamine (serotonin) receptor 1B              | Gensat |
| Tg(Htr1d-EGFP)EI245Gsat   | EGFP | Htr1d   | 5-hydroxytryptamine (serotonin) receptor 1D              | Gensat |
| Tg(Htr2a-EGFP)DQ118Gsat   | EGFP | Htr2a   | 5-hydroxytryptamine (serotonin) receptor 2A              | Gensat |
| Tg(Htr3a-EGFP)DH30Gsat    | EGFP | Htr3a   | 5-hydroxytryptamine (serotonin) receptor 3A              | Gensat |
| Tg(Htr3b-EGFP)DP271Gsat   | EGFP | Htr3b   | 5-hydroxytryptamine (serotonin) receptor 3B              | Gensat |
| Tg(Htr4-EGFP)AU103Gsat    | EGFP | Htr4    | 5 hydroxytryptamine (serotonin) receptor 4               | Gensat |
| Tg(Htr5a-EGFP)NK60Gsat    | EGFP | Htr5a   | 5-hydroxytryptamine (serotonin) receptor 5A              | Gensat |
| Tg(Htr5b-EGFP)BZ265Gsat   | EGFP | Htr5b   | 5-hydroxytryptamine (serotonin) receptor 5B              | Gensat |
| Tg(Htr6-EGFP)FV41Gsat     | EGFP | Htr6    | 5-hydroxytryptamine (serotonin) receptor 6               | Gensat |
| Tg(Htr7-EGFP)ST29Gsat     | EGFP | Htr7    | 5-hydroxytryptamine (serotonin) receptor 7               | Gensat |
| Tg(Icam5-EGFP)IM202Gsat   | EGFP | Icam5   | intercellular adhesion molecule 5, telencephalin         | Gensat |
| Tg(Id1-EGFP)NJ135Gsat     | EGFP | Id1     | inhibitor of DNA binding 1                               | Gensat |
| Tg(Id2-EGFP)NW236Gsat     | EGFP | Id2     | inhibitor of DNA binding 2                               | Gensat |
| Tg(Id3-EGFP)FS137Gsat     | EGFP | Id3     | inhibitor of DNA binding 3                               | Gensat |
| Tg(Id4-EGFP)GX134Gsat     | EGFP | Id4     | inhibitor of DNA binding 4                               | Gensat |
| Tg(ldh3a-EGFP)IF220Gsat   | EGFP | ldh3a   | isocitrate dehydrogenase 3 (NAD+) alpha                  | Gensat |
| Tg(Ier3ip1-EGFP)PS62Gsat  | EGFP | Ier3ip1 | immediate early response 3 interacting protein 1         | Gensat |
| Tg(Ier5-EGFP)IG267Gsat    | EGFP | Ier5    | immediate early response 5                               | Gensat |
| Tg(Ilf1203-EGFP)FQ135Gsat | EGFP | Ilf1203 | interferon activated gene 203                            | Gensat |
| Tg(Igf1-EGFP)CO18Gsat     | EGFP | Igf1    | insulin-like growth factor 1                             | Gensat |
| Tg(Igfbp2-EGFP)JT17Gsat   | EGFP | Igfbp2  | insulin-like growth factor binding protein 2             | Gensat |
| Tg(Igfbp3-EGFP)LZ134Gsat  | EGFP | Igfbp3  | insulin-like growth factor binding protein 3             | Gensat |
| Tg(Igfbp4-EGFP)IS47Gsat   | EGFP | Igfbp4  | insulin-like growth factor binding protein 4             | Gensat |
| Tg(Igfbp5-EGFP)JE168Gsat  | EGFP | Igfbp5  | insulin-like growth factor binding protein 5             | Gensat |
| Tg(Igsf9-EGFP)JR10Gsat    | EGFP | Igsf9   | immunoglobulin superfamily, member 9                     | Gensat |
| Tg(Il16-EGFP)OY150Gsat    | EGFP | Il16    | interleukin 16                                           | Gensat |
| Tg(Inpp5j-EGFP)MP181Gsat  | EGFP | Inpp5j  | inositol polyphosphate 5-phosphatase J                   | Gensat |
| Tg(Insig2-EGFP)JL131Gsat  | EGFP | Insig2  | insulin induced gene 2                                   | Gensat |
| Tg(Iqsec3-EGFP)JA8Gsat    | EGFP | Iqsec3  | IQ motif and Sec7 domain 3                               | Gensat |
| Tg(Irs4-EGFP)IB365Gsat    | EGFP | Irs4    | insulin receptor substrate 4                             | Gensat |
| Tg(Irx3-EGFP)BW61Gsat     | EGFP | Irx3    | Iroquois related homeobox 3 (Drosophila)                 | Gensat |
| Tg(Irx4-EGFP)KT189Gsat    | EGFP | Irx4    | Iroquois related homeobox 4 (Drosophila)                 | Gensat |
| Tg(Isl2-EGFP)LW124Gsat    | EGFP | Isl2    | insulin related protein 2 (islet 2)                      | Gensat |
| Tg(Islr2-EGFP)IB279Gsat   | EGFP | Islr2   | immunoglobulin superfamily containing leucine-rich       | Gensat |
| Tg(Itgb3-EGFP)JK58Gsat    | EGFP | Itgb3   | integrin beta 3                                          | Gensat |
| Tg(Itm2b-EGFP)AQ215Gsat   | EGFP | Itm2b   | integral membrane protein 2B                             | Gensat |
| Tg(Jag1-EGFP)OM21Gsat     | EGFP | Jag1    | jagged 1                                                 | Gensat |
| Tg(Jak2-EGFP)FW203Gsat    | EGFP | Jak2    | Janus kinase 2                                           | Gensat |
| Tg(Jam3-EGFP)HE12Gsat     | EGFP | Jam3    | junction adhesion molecule 3                             | Gensat |
| Tg(Jph4-EGFP)KC33Gsat     | EGFP | Jph4    | junctionophilin 4                                        | Gensat |
| Tg(Jup-EGFP)LT242Gsat     | EGFP | Jup     | junction plakoglobin                                     | Gensat |
| Tg(Kank4-EGFP)KN116Gsat   | EGFP | Kank4   | KN motif and ankyrin repeat domains 4                    | Gensat |
| Tg(Kcna4-EGFP)NH187Gsat   | EGFP | Kcna4   | potassium voltage-gated channel, shaker-related $\alpha$ | Gensat |
| Tg(Kcnab3-EGFP)QT75Gsat   | EGFP | Kcnab3  | potassium voltage-gated channel, shaker-related $\beta$  | Gensat |
| Tg(Kcnc1-EGFP)FK297Gsat   | EGFP | Kcnc1   | potassium voltage gated channel, Shaw-related $\alpha$   | Gensat |
| Tg(Kcnc4-EGFP)JM187Gsat   | EGFP | Kcnc4   | potassium voltage gated channel, Shaw-related $\beta$    | Gensat |
| Tg(Kcng3-EGFP)NK16Gsat    | EGFP | Kcng3   | potassium voltage-gated channel, subfamily G, mer        | Gensat |
| Tg(Kcnp2-EGFP)KN211Gsat   | EGFP | Kcnp2   | Kv channel-interacting protein 2                         | Gensat |
| Tg(Kcnj14-EGFP)KX86Gsat   | EGFP | Kcnj14  | potassium inwardly-rectifying channel, subfamily J,      | Gensat |
| Tg(Kcnj5-EGFP)BZ49Gsat    | EGFP | Kcnj5   | potassium inwardly-rectifying channel, subfamily J,      | Gensat |
| Tg(Kcnk1-EGFP)HW44Gsat    | EGFP | Kcnk1   | potassium channel, subfamily K, member 1                 | Gensat |
| Tg(Kcnq2-EGFP)FW221Gsat   | EGFP | Kcnq2   | potassium voltage-gated channel, subfamily Q, mer        | Gensat |
| Tg(Kctd12-EGFP)MX49Gsat   | EGFP | Kctd12  | potassium channel tetramerisation domain containin       | Gensat |
| Tg(Kctd13-EGFP)EF145Gsat  | EGFP | Kctd13  | potassium channel tetramerisation domain containin       | Gensat |
| Tg(Kctd4-EGFP)IB253Gsat   | EGFP | Kctd4   | potassium channel tetramerisation domain containin       | Gensat |
| Tg(Kdm5b-EGFP)PD56Gsat    | EGFP | Kdm5b   | lysine (K)-specific demethylase 5B                       | Gensat |
| Tg(Kel-EGFP)LX107Gsat     | EGFP | Kel     | Kell blood group                                         | Gensat |
| Tg(Kera-EGFP)CM50Gsat     | EGFP | Kera    | keratocan                                                | Gensat |
| Tg(Khdrbs1-EGFP)LR219Gsat | EGFP | Khdrbs1 | KH domain containing, RNA binding, signal transdu        | Gensat |
| Tg(Kif11-EGFP)NM58Gsat    | EGFP | Kif11   | kinesin family member 11                                 | Gensat |
| Tg(Kif26a-EGFP)HV176Gsat  | EGFP | Kif26a  | kinesin family member 26A                                | Gensat |
| Tg(Kit-EGFP)IF44Gsat      | EGFP | Kit     | kit oncogene                                             | Gensat |
| Tg(Klf10-EGFP)HP11Gsat    | EGFP | Klf10   | Kruppel-like factor 10                                   | Gensat |
| Tg(Klf13-EGFP)IN87Gsat    | EGFP | Klf13   | Kruppel-like factor 13                                   | Gensat |

|                            |      |          |                                                      |        |
|----------------------------|------|----------|------------------------------------------------------|--------|
| Tg(Khl23-EGFP)MF30Gsat     | EGFP | Khl23    | kelch-like 23 (Drosophila)                           | Gensat |
| Tg(Klk8-EGFP)KD59Gsat      | EGFP | Klk8     | kallikrein related-peptidase 8                       | Gensat |
| Tg(Kremen1-EGFP)JP132Gsat  | EGFP | Kremen1  | kringle containing transmembrane protein 1           | Gensat |
| Tg(Krt19-EGFP)KJ47Gsat     | EGFP | Krt19    | keratin 19                                           | Gensat |
| Tg(Lamb1-1-EGFP)FK281Gsat  | EGFP | Lamb1    | laminin B1                                           | Gensat |
| Tg(Laptm4b-EGFP)LR91Gsat   | EGFP | Laptm4b  | lysosomal-associated protein transmembrane 4B        | Gensat |
| Tg(Layn-EGFP)HZ80Gsat      | EGFP | Layn     | layilin                                              | Gensat |
| Tg(Lbh-EGFP)DP105Gsat      | EGFP | Lbh      | limb-bud and heart                                   | Gensat |
| Tg(Ldb1-EGFP)FZ121Gsat     | EGFP | Ldb1     | LIM domain binding 1                                 | Gensat |
| Tg(Lect1-EGFP)DS183Gsat    | EGFP | Lect1    | leukocyte cell derived chemotaxin 1                  | Gensat |
| Tg(Lef1-EGFP)IN75Gsat      | EGFP | Lef1     | lymphoid enhancer binding factor 1                   | Gensat |
| Tg(Lfng-EGFP)HM340Gsat     | EGFP | Lfng     | LFNG O-fucosylpeptide 3-beta-N-acetylglucosamin      | Gensat |
| Tg(Lgals3-EGFP)JE193Gsat   | EGFP | Lgals3   | lectin, galactose binding, soluble 3                 | Gensat |
| Tg(Lgals9-EGFP)JF66Gsat    | EGFP | Lgals9   | lectin, galactose binding, soluble 9                 | Gensat |
| Tg(Lgi1-EGFP)FJ35Gsat      | EGFP | Lgi1     | leucine-rich repeat LGI family, member 1             | Gensat |
| Tg(Lgi3-EGFP)HD108Gsat     | EGFP | Lgi3     | leucine-rich repeat LGI family, member 3             | Gensat |
| Tg(Lhx2-EGFP)JX13Gsat      | EGFP | Lhx2     | LIM homeobox protein 2                               | Gensat |
| Tg(Lhx4-EGFP)KN199Gsat     | EGFP | Lhx4     | LIM homeobox protein 4                               | Gensat |
| Tg(Lhx5-EGFP)BR182Gsat     | EGFP | Lhx5     | LIM homeobox protein 5                               | Gensat |
| Tg(Lhx6-EGFP)BP221Gsat     | EGFP | Lhx6     | LIM homeobox protein 6                               | Gensat |
| Tg(Lhx8-EGFP)MJ80Gsat      | EGFP | Lhx8     | LIM homeobox protein 8                               | Gensat |
| Tg(Lhx9-EGFP)FO52Gsat      | EGFP | Lhx9     | LIM homeobox protein 9                               | Gensat |
| Tg(Limd2-EGFP)MK18Gsat     | EGFP | Limd2    | LIM domain containing 2                              | Gensat |
| Tg(Limk1-EGFP)JL98Gsat     | EGFP | Limk1    | LIM-domain containing, protein kinase                | Gensat |
| Tg(Lix1-EGFP)HR308Gsat     | EGFP | Lix1     | limb expression 1 homolog (chicken)                  | Gensat |
| Tg(Lmo1-EGFP)KN5Gsat       | EGFP | Lmo1     | LIM domain only 1                                    | Gensat |
| Tg(Lmo2-EGFP)NK30Gsat      | EGFP | Lmo2     | LIM domain only 2                                    | Gensat |
| Tg(Lmo4-EGFP)HM7Gsat       | EGFP | Lmo4     | LIM domain only 4                                    | Gensat |
| Tg(Lpar1-EGFP)GX193Gsat    | EGFP | Lpar1    | lysophosphatidic acid receptor 1                     | Gensat |
| Tg(Lpl-EGFP)LA211Gsat      | EGFP | Lpl      | lipoprotein lipase                                   | Gensat |
| Tg(Lrig1-EGFP)KP321Gsat    | EGFP | Lrig1    | leucine-rich repeats and immunoglobulin-like domai   | Gensat |
| Tg(Lrig2-EGFP)AP195Gsat    | EGFP | Lrig2    | leucine-rich repeats and immunoglobulin-like domai   | Gensat |
| Tg(Lrp3-EGFP)QH28Gsat      | EGFP | Lrp3     | low density lipoprotein receptor-related protein 3   | Gensat |
| Tg(Lrrc55-EGFP)KS290Gsat   | EGFP | Lrrc55   | leucine rich repeat containing 55                    | Gensat |
| Tg(Lrrc8c-EGFP)MA108Gsat   | EGFP | Lrrc8c   | leucine rich repeat containing 8 family, member C    | Gensat |
| Tg(Lrrk2-EGFP)KJ162Gsat    | EGFP | Lrrk2    | leucine-rich repeat kinase 2                         | Gensat |
| Tg(Lrrm1-EGFP)FK43Gsat     | EGFP | Lrrm1    | leucine rich repeat protein 1, neuronal              | Gensat |
| Tg(Lrrm2-EGFP)QY47Gsat     | EGFP | Lrrm2    | leucine rich repeat protein 2, neuronal              | Gensat |
| Tg(Lrrm3-EGFP)DX105Gsat    | EGFP | Lrrm3    | leucine rich repeat protein 3, neuronal              | Gensat |
| Tg(Lrrtm1-EGFP)LA50Gsat    | EGFP | Lrrtm1   | leucine rich repeat transmembrane neuronal 1         | Gensat |
| Tg(Lss-EGFP)JR102Gsat      | EGFP | Lss      | lanosterol synthase                                  | Gensat |
| Tg(Ly6k-EGFP)BS3Gsat       | EGFP | Ly6k     | lymphocyte antigen 6 complex, locus K                | Gensat |
| Tg(Lynx1-EGFP)ID187Gsat    | EGFP | Lynx1    | Ly6/neurotoxin 1                                     | Gensat |
| Tg(Lypd1-EGFP)FL30Gsat     | EGFP | Lypd1    | Ly6/Plaur domain containing 1                        | Gensat |
| Tg(Lypd2-EGFP)BQ71Gsat     | EGFP | Lypd2    | Ly6/Plaur domain containing 2                        | Gensat |
| Tg(Lzts1-EGFP)LB205Gsat    | EGFP | Lzts1    | leucine zipper, putative tumor suppressor 1          | Gensat |
| Tg(Mafb-EGFP)FT79Gsat      | EGFP | Mafb     | v-maf musculoaponeurotic fibrosarcoma oncogene       | Gensat |
| Tg(Magea8-EGFP)HK90Gsat    | EGFP | MAGEA8   | melanoma antigen family A, 8                         | Gensat |
| Tg(Magel2-EGFP)JU37Gsat    | EGFP | Magel2   | melanoma antigen, family L, 2                        | Gensat |
| Tg(Maob-EGFP)LU221Gsat     | EGFP | Maob     | monoamine oxidase B                                  | Gensat |
| Tg(Map1lc3a-EGFP)KX138Gsat | EGFP | Map1lc3a | microtubule-associated protein 1 light chain 3 alpha | Gensat |
| Tg(Map4k5-EGFP)CQ13Gsat    | EGFP | Map4k5   | mitogen-activated protein kinase kinase kinase kina  | Gensat |
| Tg(Mapk1-EGFP)FW14Gsat     | EGFP | Mapk1    | mitogen-activated protein kinase 1                   | Gensat |
| Tg(Mapk8-EGFP)FV33Gsat     | EGFP | Mapk8    | mitogen-activated protein kinase 8                   | Gensat |
| Tg(Mapt-EGFP)JD123Gsat     | EGFP | Mapt     | microtubule-associated protein tau                   | Gensat |
| Tg(March4-EGFP)BJ20Gsat    | EGFP | March4   | membrane-associated ring finger (C3HC4) 4            | Gensat |
| Tg(MatK-EGFP)GB287Gsat     | EGFP | Matk     | megakaryocyte-associated tyrosine kinase             | Gensat |
| Tg(Mbd2-EGFP)DK105Gsat     | EGFP | Mbd2     | methyl-CpG binding domain protein 2                  | Gensat |
| Tg(Mbd4-EGFP)DI39Gsat      | EGFP | Mbd4     | methyl-CpG binding domain protein 4                  | Gensat |
| Tg(Mbd5-EGFP)DN5Gsat       | EGFP | Mbd5     | methyl-CpG binding domain protein 5                  | Gensat |
| Tg(Mc3r-EGFP)BX153Gsat     | EGFP | Mc3r     | melanocortin 3 receptor                              | Gensat |
| Tg(Mcm5-EGFP)LJ85Gsat      | EGFP | Mcm5     | minichromosome maintenance deficient 5, cell divis   | Gensat |
| Tg(Mdh1-EGFP)KR498Gsat     | EGFP | Mdh1     | malate dehydrogenase 1, NAD (soluble)                | Gensat |
| Tg(Mdk-EGFP)DJ208Gsat      | EGFP | Mdk      | midkine                                              | Gensat |
| Tg(Me2-EGFP)PE215Gsat      | EGFP | Me2      | malic enzyme 2, NAD(+)-dependent, mitochondrial      | Gensat |
| Tg(Mecom-EGFP)NG190Gsat    | EGFP | Mecom    | MDS1 and EVI1 complex locus                          | Gensat |
| Tg(Med12-EGFP)KC98Gsat     | EGFP | Med12    | mediator of RNA polymerase II transcription, subuni  | Gensat |
| Tg(Med4-EGFP)LD241Gsat     | EGFP | Med4     | mediator of RNA polymerase II transcription, subuni  | Gensat |
| Tg(Mef2c-EGFP)GJ92Gsat     | EGFP | Mef2c    | myocyte enhancer factor 2C                           | Gensat |
| Tg(Meis1-EGFP)FO156Gsat    | EGFP | Meis1    | Meis homeobox 1                                      | Gensat |
| Tg(Mfap2-EGFP)DA112Gsat    | EGFP | Mfap2    | microfibrillar-associated protein 2                  | Gensat |
| Tg(Mfap4-EGFP)HF313Gsat    | EGFP | Mfap4    | microfibrillar-associated protein 4                  | Gensat |
| Tg(Mfn1-EGFP)HP51Gsat      | EGFP | Mfn1     | mitofusin 1                                          | Gensat |
| Tg(Mfn2-EGFP)HR116Gsat     | EGFP | Mfn2     | mitofusin 2                                          | Gensat |

|                           |      |         |                                                                        |        |
|---------------------------|------|---------|------------------------------------------------------------------------|--------|
| Tg(Mgll-EGFP)KT276Gsat    | EGFP | Mgll    | monoglyceride lipase                                                   | Gensat |
| Tg(Mgst3-EGFP)NL79Gsat    | EGFP | Mgst3   | microsomal glutathione S-transferase 3                                 | Gensat |
| Tg(Mki67-EGFP)MC169Gsat   | EGFP | Mki67   | antigen identified by monoclonal antibody Ki 67                        | Gensat |
| Tg(Mmp17-EGFP)HX98Gsat    | EGFP | Mmp17   | matrix metalloproteinase 17                                            | Gensat |
| Tg(Mmp2-EGFP)GQ8Gsat      | EGFP | Mmp2    | matrix metalloproteinase 2                                             | Gensat |
| Tg(Mnx1-EGFP)GX229Gsat    | EGFP | Mnx1    | motor neuron and pancreas homeobox 1                                   | Gensat |
| Tg(Mobp-EGFP)IN1Gsat      | EGFP | Mobp    | myelin-associated oligodendrocytic basic protein                       | Gensat |
| Tg(Moxd1-EGFP)ND125Gsat   | EGFP | Moxd1   | monooxygenase, DBH-like 1                                              | Gensat |
| Tg(Mpp3-EGFP)NK183Gsat    | EGFP | Mpp3    | membrane protein, palmitoylated 3 (MAGUK p55 subunit)                  | Gensat |
| Tg(Mst1r-EGFP)NF17Gsat    | EGFP | Mst1r   | macrophage stimulating 1 receptor (c-met-related tyrosine kinase)      | Gensat |
| Tg(Msx1-EGFP)LS57Gsat     | EGFP | Msx1    | homeobox, msh-like 1                                                   | Gensat |
| Tg(Mt1-EGFP)KQ37Gsat      | EGFP | Mt1     | metallothionein 1                                                      | Gensat |
| Tg(Mtap-EGFP)HO212Gsat    | EGFP | Mtap    | methylthioadenosine phosphorylase                                      | Gensat |
| Tg(Mtap1b-EGFP)HO50Gsat   | EGFP | Mtap1b  | microtubule-associated protein 1B                                      | Gensat |
| Tg(Mxi1-EGFP)HK378Gsat    | EGFP | Mxi1    | Max interacting protein 1                                              | Gensat |
| Tg(Myc-EGFP)KT224Gsat     | EGFP | Myc     | myelocytomatosis oncogene                                              | Gensat |
| Tg(Mycbp-EGFP)LD200Gsat   | EGFP | Mycbp   | c-myc binding protein                                                  | Gensat |
| Tg(Mycn-EGFP)ET250Gsat    | EGFP | Mycn    | v-myc myelocytomatosis viral related oncogene, neuroblastoma variant 1 | Gensat |
| Tg(N28178-EGFP)MJ26Gsat   | EGFP | N28178  | expressed sequence N28178                                              | Gensat |
| Tg(Nae1-EGFP)DX194Gsat    | EGFP | Nae1    | NEDD8 activating enzyme E1 subunit 1                                   | Gensat |
| Tg(Napb-EGFP)KO216Gsat    | EGFP | Napb    | N-ethylmaleimide sensitive fusion protein attachment protein           | Gensat |
| Tg(Nars-EGFP)IM424Gsat    | EGFP | Nars    | asparaginyl-tRNA synthetase                                            | Gensat |
| Tg(Nbl1-EGFP)NY104Gsat    | EGFP | Nbl1    | neuroblastoma, suppression of tumorigenicity 1                         | Gensat |
| Tg(Ncor1-EGFP)EC40Gsat    | EGFP | Ncor1   | nuclear receptor co-repressor 1                                        | Gensat |
| Tg(Ndel1-EGFP)HK143Gsat   | EGFP | Ndel1   | nuclear distribution gene E-like homolog 1 (A. nidulans)               | Gensat |
| Tg(Ndr1-EGFP)EQ125Gsat    | EGFP | Ndr1    | N-myc downstream regulated gene 1                                      | Gensat |
| Tg(Ndufv1-EGFP)GU116Gsat  | EGFP | Ndufv1  | NADH dehydrogenase (ubiquinone) flavoprotein 1                         | Gensat |
| Tg(Ndufv2-EGFP)KJ337Gsat  | EGFP | Ndufv2  | NADH dehydrogenase (ubiquinone) flavoprotein 2                         | Gensat |
| Tg(Nefh-EGFP)GY27Gsat     | EGFP | Nefh    | neurofilament, heavy polypeptide                                       | Gensat |
| Tg(Nefl-EGFP)GZ84Gsat     | EGFP | Nefl    | neurofilament, light polypeptide                                       | Gensat |
| Tg(Nefm-EGFP)JA40Gsat     | EGFP | Nefm    | neurofilament, medium polypeptide                                      | Gensat |
| Tg(Nelf-EGFP)FY2Gsat      | EGFP | Nelf    | nasal embryonic LHRH factor                                            | Gensat |
| Tg(Nes-EGFP)NN48Gsat      | EGFP | Nes     | nestin                                                                 | Gensat |
| Tg(Neto2-EGFP)PS83Gsat    | EGFP | Neto2   | neuroligin (NRP) and tolloid (TLL)-like 2                              | Gensat |
| Tg(Neurod1-EGFP)CR99Gsat  | EGFP | Neurod1 | neurogenic differentiation 1                                           | Gensat |
| Tg(Neurod4-EGFP)EU70Gsat  | EGFP | Neurod4 | neurogenic differentiation 4                                           | Gensat |
| Tg(Neurog1-EGFP)DF148Gsat | EGFP | Neurog1 | neurogenin 1                                                           | Gensat |
| Tg(Neurog2-EGFP)PP13Gsat  | EGFP | Neurog2 | neurogenin 2                                                           | Gensat |
| Tg(Ngfb-EGFP)KI30Gsat     | EGFP | Ngf     | nerve growth factor                                                    | Gensat |
| Tg(Ngfr-EGFP)QU6Gsat      | EGFP | Ngfr    | nerve growth factor receptor (TNFR superfamily, member 1)              | Gensat |
| Tg(Nhlh1-EGFP)DT72Gsat    | EGFP | Nhlh1   | nescent helix loop helix 1                                             | Gensat |
| Tg(Nhp2-EGFP)HS231Gsat    | EGFP | Nhp2    | NHP2 ribonucleoprotein homolog (yeast)                                 | Gensat |
| Tg(Nkx2-1-EGFP)HI199Gsat  | EGFP | Nkx2-1  | NK2 homeobox 1                                                         | Gensat |
| Tg(Nlgn3-EGFP)DQ200Gsat   | EGFP | Nlgn3   | neuroligin 3                                                           | Gensat |
| Tg(Nmb-EGFP)IT50Gsat      | EGFP | Nmb     | neuromedin B                                                           | Gensat |
| Tg(Nmbr-EGFP)JG22Gsat     | EGFP | Nmbr    | neuromedin B receptor                                                  | Gensat |
| Tg(Nms-EGFP)GQ216Gsat     | EGFP | Nms     | neuromedin S                                                           | Gensat |
| Tg(Nmu-EGFP)EL175Gsat     | EGFP | Nmu     | neuromedin U                                                           | Gensat |
| Tg(Nnat-EGFP)EA106Gsat    | EGFP | Nnat    | neuronatin                                                             | Gensat |
| Tg(Nog-EGFP)JG92Gsat      | EGFP | Nog     | noggin                                                                 | Gensat |
| Tg(Nomo1-EGFP)FQ101Gsat   | EGFP | Nomo1   | nodal modulator 1                                                      | Gensat |
| Tg(Nos1-EGFP)DP185Gsat    | EGFP | Nos1    | nitric oxide synthase 1, neuronal                                      | Gensat |
| Tg(Notch2-EGFP)DG195Gsat  | EGFP | Notch2  | Notch gene homolog 2 (Drosophila)                                      | Gensat |
| Tg(Nov-EGFP)JE105Gsat     | EGFP | Nov     | nephroblastoma overexpressed gene                                      | Gensat |
| Tg(Npc1-EGFP)KB67Gsat     | EGFP | Npc1    | Niemann Pick type C1                                                   | Gensat |
| Tg(Nptx1-EGFP)MI86Gsat    | EGFP | Nptx1   | neuronal pentraxin 1                                                   | Gensat |
| Tg(Nptx2-EGFP)MC183Gsat   | EGFP | Nptx2   | neuronal pentraxin 2                                                   | Gensat |
| Tg(Npy1r-EGFP)EK65Gsat    | EGFP | Npy1r   | neuropeptide Y receptor Y1                                             | Gensat |
| Tg(Npy2r-EGFP)EJ71Gsat    | EGFP | Npy2r   | neuropeptide Y receptor Y2                                             | Gensat |
| Tg(Npy5r-EGFP)EX220Gsat   | EGFP | Npy5r   | neuropeptide Y receptor Y5                                             | Gensat |
| Tg(Nr0b1-EGFP)NA249Gsat   | EGFP | Nr0b1   | nuclear receptor subfamily 0, group B, member 1                        | Gensat |
| Tg(Nr1d1-EGFP)QY9Gsat     | EGFP | Nr1d1   | nuclear receptor subfamily 1, group D, member 1                        | Gensat |
| Tg(Nr2e1-EGFP)LU210Gsat   | EGFP | Nr2e1   | nuclear receptor subfamily 2, group E, member 1                        | Gensat |
| Tg(Nr2f2-EGFP)BN102Gsat   | EGFP | Nr2f2   | nuclear receptor subfamily 2, group F, member 2                        | Gensat |
| Tg(Nr3c1-EGFP)IR3Gsat     | EGFP | Nr3c1   | nuclear receptor subfamily 3, group C, member 1                        | Gensat |
| Tg(Nr4a1-EGFP)GY139Gsat   | EGFP | Nr4a1   | nuclear receptor subfamily 4, group A, member 1                        | Gensat |
| Tg(Nr4a2-EGFP)QU31Gsat    | EGFP | Nr4a2   | nuclear receptor subfamily 4, group A, member 2                        | Gensat |
| Tg(Nr4a3-EGFP)ND47Gsat    | EGFP | Nr4a3   | nuclear receptor subfamily 4, group A, member 3                        | Gensat |
| Tg(Nr5a1-EGFP)NB184Gsat   | EGFP | Nr5a1   | nuclear receptor subfamily 5, group A, member 1                        | Gensat |
| Tg(Nrg1-EGFP)LS131Gsat    | EGFP | Nrg1    | neuregulin 1                                                           | Gensat |
| Tg(Nrgn-EGFP)KM74Gsat     | EGFP | Nrgn    | neurogranin                                                            | Gensat |
| Tg(Nrip3-EGFP)KY32Gsat    | EGFP | Nrip3   | nuclear receptor interacting protein 3                                 | Gensat |
| Tg(Nrp2-EGFP)SH25Gsat     | EGFP | Nrp2    | neuropilin 2                                                           | Gensat |
| Tg(Nrp2-EGFP)CX13Gsat     | EGFP | Nrp2    | neuropilin 2                                                           | Gensat |

|                            |      |          |                                                       |        |
|----------------------------|------|----------|-------------------------------------------------------|--------|
| Tg(Nrtn-EGFP)R150Gsat      | EGFP | Nrtn     | neurturin                                             | Gensat |
| Tg(Nrxn2-EGFP)FO113Gsat    | EGFP | Nrxn2    | neurexin II                                           | Gensat |
| Tg(Nsf-EGFP)JL288Gsat      | EGFP | Nsf      | N-ethylmaleimide sensitive fusion protein             | Gensat |
| Tg(Nsg1-EGFP)HP273Gsat     | EGFP | Nsg1     | neuron specific gene family member 1                  | Gensat |
| Tg(Ntf3-EGFP)NF145Gsat     | EGFP | Ntf3     | neurotrophin 3                                        | Gensat |
| Tg(Ntng2-EGFP)HF160Gsat    | EGFP | Ntng2    | netrin G2                                             | Gensat |
| Tg(Ntrk1-EGFP)CA255Gsat    | EGFP | Ntrk1    | neurotrophic tyrosine kinase, receptor, type 1        | Gensat |
| Tg(Ntrk3-EGFP)BM45Gsat     | EGFP | Ntrk3    | neurotrophic tyrosine kinase, receptor, type 3        | Gensat |
| Tg(Nts-EGFP)EC58Gsat       | EGFP | Nts      | neurotensin                                           | Gensat |
| Tg(Ntsr1-EGFP)DT16Gsat     | EGFP | Ntsr1    | neurotensin receptor 1                                | Gensat |
| Tg(Nudt2-EGFP)FV213Gsat    | EGFP | Nudt2    | nudix (nucleoside diphosphate linked moiety X)-typi   | Gensat |
| Tg(Numb-EGFP)JL166Gsat     | EGFP | Numb     | numb gene homolog (Drosophila)                        | Gensat |
| Tg(NumbL-EGFP)MA48Gsat     | EGFP | NumbL    | numb-like                                             | Gensat |
| Tg(Nxph4-EGFP)IE296Gsat    | EGFP | Nxph4    | neurexophilin 4                                       | Gensat |
| Tg(Odc1-EGFP)E144Gsat      | EGFP | Odc1     | ornithine decarboxylase, structural 1                 | Gensat |
| Tg(Olfm1-EGFP)IB134Gsat    | EGFP | Olfm1    | olfactomedin 1                                        | Gensat |
| Tg(Olfm12b-EGFP)NW75Gsat   | EGFP | Olfm12b  | olfactomedin-like 2B                                  | Gensat |
| Tg(Olfr734-EGFP)JT74Gsat   | EGFP | Olfr734  | olfactory receptor 734                                | Gensat |
| Tg(Olig1-EGFP)EK92Gsat     | EGFP | Olig1    | oligodendrocyte transcription factor 1                | Gensat |
| Tg(Olig2-EGFP)EK23Gsat     | EGFP | Olig2    | oligodendrocyte transcription factor 2                | Gensat |
| Tg(Olig3-EGFP)QC108Gsat    | EGFP | Olig3    | oligodendrocyte transcription factor 3                | Gensat |
| Tg(Oma1-EGFP)LU178Gsat     | EGFP | Oma1     | OMA1 homolog, zinc metalloproteinase (S. cerevisiae)  | Gensat |
| Tg(Ophn1-EGFP)BF244Gsat    | EGFP | Ophn1    | oligophrenin 1                                        | Gensat |
| Tg(Opn3-EGFP)JY3Gsat       | EGFP | Opn3     | opsin 3                                               | Gensat |
| Tg(Opn4-EGFP)ND100Gsat     | EGFP | Opn4     | opsin 4 (melanopsin)                                  | Gensat |
| Tg(Oprd1-EGFP)OF66Gsat     | EGFP | Oprd1    | opioid receptor, delta 1                              | Gensat |
| Tg(Osbp11a-EGFP)FH110Gsat  | EGFP | Osbp11a  | oxysterol binding protein-like 1A                     | Gensat |
| Tg(Otof-EGFP)IC76Gsat      | EGFP | Otof     | otofelin                                              | Gensat |
| Tg(Otp-EGFP)OI121Gsat      | EGFP | Otp      | orthopedia homolog (Drosophila)                       | Gensat |
| Tg(Otx1-EGFP)AH224Gsat     | EGFP | Otx1     | orthodenticle homolog 1 (Drosophila)                  | Gensat |
| Tg(Oxt-EGFP)LC317Gsat      | EGFP | Oxt      | oxytocin                                              | Gensat |
| Tg(Oxtr-EGFP)GO185Gsat     | EGFP | Oxtr     | oxytocin receptor                                     | Gensat |
| Tg(P2rx7-EGFP)FY174Gsat    | EGFP | P2rx7    | purinergic receptor P2X, ligand-gated ion channel, 7  | Gensat |
| Tg(Pak1-EGFP)EJ8Gsat       | EGFP | Pak1     | p21 protein (Cdc42/Rac)-activated kinase 1            | Gensat |
| Tg(Pak6-EGFP)JU92Gsat      | EGFP | Pak6     | p21 protein (Cdc42/Rac)-activated kinase 6            | Gensat |
| Tg(Pard6a-EGFP)FG234Gsat   | EGFP | Pard6a   | par-6 (partitioning defective 6,) homolog alpha (C. e | Gensat |
| Tg(Pax2-EGFP)MR165Gsat     | EGFP | Pax2     | paired box gene 2                                     | Gensat |
| Tg(Pax6-EGFP)BV100Gsat     | EGFP | Pax6     | paired box gene 6                                     | Gensat |
| Tg(Pax7-EGFP)NG60Gsat      | EGFP | Pax7     | paired box gene 7                                     | Gensat |
| Tg(Pcbd1-EGFP)JJ269Gsat    | EGFP | Pcbd1    | pterin 4 alpha carbinolamine dehydratase/dimerizat    | Gensat |
| Tg(Pcdh17-EGFP)MR152Gsat   | EGFP | Pcdh17   | protocadherin 17                                      | Gensat |
| Tg(Pcdh20-EGFP)LT86Gsat    | EGFP | Pcdh20   | protocadherin 20                                      | Gensat |
| Tg(Pcdh9-EGFP)FD256Gsat    | EGFP | Pcdh9    | protocadherin 9                                       | Gensat |
| Tg(Pcnt-EGFP)HR166Gsat     | EGFP | Pcnt     | pericentrin (kendrin)                                 | Gensat |
| Tg(Pcp2-EGFP)BT153Gsat     | EGFP | Pcp2     | Purkinje cell protein 2 (L7)                          | Gensat |
| Tg(Pcp4-EGFP)GI332Gsat     | EGFP | Pcp4     | Purkinje cell protein 4                               | Gensat |
| Tg(Pcsk9-EGFP)FU119Gsat    | EGFP | Pcsk9    | proprotein convertase subtilisin/kexin type 9         | Gensat |
| Tg(Pde1b-EGFP)GK53Gsat     | EGFP | Pde1b    | phosphodiesterase 1B, Ca2+-calmodulin dependen        | Gensat |
| Tg(Pde1c-EGFP)JS45Gsat     | EGFP | Pde1c    | phosphodiesterase 1C                                  | Gensat |
| Tg(Pdgfra-EGFP)NW179Gsat   | EGFP | Pdgfra   | platelet derived growth factor receptor, alpha polype | Gensat |
| Tg(Pdgfrb-EGFP)JN169Gsat   | EGFP | Pdgfrb   | platelet derived growth factor receptor, beta polypep | Gensat |
| Tg(Pdyn-EGFP)BD193Gsat     | EGFP | Pdyn     | prodynorphin                                          | Gensat |
| Tg(Pdzk1ip1-EGFP)BA237Gsat | EGFP | Pdzk1ip1 | PDZK1 interacting protein 1                           | Gensat |
| Tg(Peg10-EGFP)OD131Gsat    | EGFP | Peg10    | paternally expressed 10                               | Gensat |
| Tg(Peg3-EGFP)KA50Gsat      | EGFP | Peg3     | paternally expressed 3                                | Gensat |
| Tg(Penk1-EGFP)BK140Gsat    | EGFP | Penk     | preproenkephalin                                      | Gensat |
| Tg(Pgr-EGFP)IZ44Gsat       | EGFP | Pgr      | progesterone receptor                                 | Gensat |
| Tg(Pgrmc1-EGFP)HJ118Gsat   | EGFP | Pgrmc1   | progesterone receptor membrane component 1            | Gensat |
| Tg(Phb-EGFP)KL287Gsat      | EGFP | Phb      | prohibitin                                            | Gensat |
| Tg(Phip-EGFP)LW127Gsat     | EGFP | Phip     | pleckstrin homology domain interacting protein        | Gensat |
| Tg(Phox2a-EGFP)JH141Gsat   | EGFP | Phox2a   | paired-like homeobox 2a                               | Gensat |
| Tg(Phox2b-EGFP)JX101Gsat   | EGFP | Phox2b   | paired-like homeobox 2b                               | Gensat |
| Tg(Pias3-EGFP)DN83Gsat     | EGFP | Pias3    | protein inhibitor of activated STAT 3                 | Gensat |
| Tg(Pik3r1-EGFP)EI199Gsat   | EGFP | Pik3r1   | phosphatidylinositol 3-kinase, regulatory subunit, pi | Gensat |
| Tg(Pirt-EGFP)NT136Gsat     | EGFP | Pirt     | phosphoinositide-interacting regulator of transient r | Gensat |
| Tg(Pitx2-EGFP)JS66Gsat     | EGFP | Pitx2    | paired-like homeodomain transcription factor 2        | Gensat |
| Tg(Pkd1-EGFP)CG10Gsat      | EGFP | Pkd1     | polycystic kidney disease 1 homolog                   | Gensat |
| Tg(Pla2g7-EGFP)KP223Gsat   | EGFP | Pla2g7   | phospholipase A2, group VII (platelet-activating fact | Gensat |
| Tg(Plagl1-EGFP)MH26Gsat    | EGFP | Plagl1   | pleiomorphic adenoma gene-like 1                      | Gensat |
| Tg(Plcxd2-EGFP)NT66Gsat    | EGFP | Plcxd2   | phosphatidylinositol-specific phospholipase C, X do   | Gensat |
| Tg(Pld3-EGFP)JJ193Gsat     | EGFP | Pld3     | phospholipase D family, member 3                      | Gensat |
| Tg(Plekhg1-EGFP)MS27Gsat   | EGFP | Plekhg1  | pleckstrin homology domain containing, family G (w    | Gensat |
| Tg(Pik2-EGFP)LM123Gsat     | EGFP | Pik2     | polo-like kinase 2 (Drosophila)                       | Gensat |
| Tg(Pik3-EGFP)FE314Gsat     | EGFP | Pik3     | polo-like kinase 3 (Drosophila)                       | Gensat |

|                            |      |          |                                                       |        |
|----------------------------|------|----------|-------------------------------------------------------|--------|
| Tg(Plxdc1-EGFP)JX125Gsat   | EGFP | Plxdc1   | plexin domain containing 1                            | Gensat |
| Tg(Plxnb2-EGFP)JX73Gsat    | EGFP | Plxnb2   | plexin B2                                             | Gensat |
| Tg(Plxnd1-EGFP)HF78Gsat    | EGFP | Plxnd1   | plexin D1                                             | Gensat |
| Tg(Pmch-EGFP)PC83Gsat      | EGFP | Pmch     | pro-melanin-concentrating hormone                     | Gensat |
| Tg(Pmp22-EGFP)DG158Gsat    | EGFP | Pmp22    | peripheral myelin protein 22                          | Gensat |
| Tg(Pnmt-EGFP)EX45Gsat      | EGFP | Pnmt     | phenylethanolamine-N-methyltransferase                | Gensat |
| Tg(Podxl2-EGFP)IE372Gsat   | EGFP | Podxl2   | podocalyxin-like 2                                    | Gensat |
| Tg(Pogz-EGFP)JO49Gsat      | EGFP | Pogz     | pogo transposable element with ZNF domain             | Gensat |
| Tg(Polr1d-EGFP)HT174Gsat   | EGFP | Polr1d   | polymerase (RNA) I polypeptide D                      | Gensat |
| Tg(Polr3e-EGFP)DR24Gsat    | EGFP | Polr3e   | polymerase (RNA) III (DNA directed) polypeptide E     | Gensat |
| Tg(Pou2f1-EGFP)CN34Gsat    | EGFP | Pou2f1   | POU domain, class 2, transcription factor 1           | Gensat |
| Tg(Pou5f1-EGFP)EM4Gsat     | EGFP | Pou5f1   | POU domain, class 5, transcription factor 1           | Gensat |
| Tg(Ppm1a-EGFP)DR241Gsat    | EGFP | Ppm1a    | protein phosphatase 1A, magnesium dependent, al       | Gensat |
| Tg(Ppm1e-EGFP)GZ37Gsat     | EGFP | Ppm1e    | protein phosphatase 1E (PP2C domain containing)       | Gensat |
| Tg(Ppp1ca-EGFP)HL155Gsat   | EGFP | Ppp1ca   | protein phosphatase 1, catalytic subunit, alpha isofo | Gensat |
| Tg(Ppp1cc-EGFP)KR429Gsat   | EGFP | Ppp1cc   | protein phosphatase 1, catalytic subunit, gamma iso   | Gensat |
| Tg(Ppp1r14c-EGFP)GE128Gsat | EGFP | Ppp1r14c | protein phosphatase 1, regulatory (inhibitor) subunil | Gensat |
| Tg(Ppp1r16b-EGFP)ED169Gsat | EGFP | Ppp1r16b | protein phosphatase 1, regulatory (inhibitor) subunil | Gensat |
| Tg(Ppp1r17-EGFP)GC220Gsat  | EGFP | Ppp1r17  | protein phosphatase 1, regulatory subunit 17          | Gensat |
| Tg(Ppp1r1a-EGFP)GP57Gsat   | EGFP | Ppp1r1a  | protein phosphatase 1, regulatory (inhibitor) subunil | Gensat |
| Tg(Ppp1r2-EGFP)JX45Gsat    | EGFP | Ppp1r2   | protein phosphatase 1, regulatory (inhibitor) subunil | Gensat |
| Tg(Ppp1r7-EGFP)JH292Gsat   | EGFP | Ppp1r7   | protein phosphatase 1, regulatory (inhibitor) subunil | Gensat |
| Tg(Ppp2r2a-EGFP)FV103Gsat  | EGFP | Ppp2r2a  | protein phosphatase 2 (formerly 2A), regulatory sub   | Gensat |
| Tg(Ppp2r2d-EGFP)BK52Gsat   | EGFP | Ppp2r2d  | protein phosphatase 2, regulatory subunit B, delta i  | Gensat |
| Tg(Ppp2r5b-EGFP)NX3Gsat    | EGFP | Ppp2r5b  | protein phosphatase 2, regulatory subunit B (B56), i  | Gensat |
| Tg(Ppp4c-EGFP)IK132Gsat    | EGFP | Ppp4c    | protein phosphatase 4, catalytic subunit              | Gensat |
| Tg(Ppp5c-EGFP)KT154Gsat    | EGFP | Ppp5c    | protein phosphatase 5, catalytic subunit              | Gensat |
| Tg(Ppp6c-EGFP)HA42Gsat     | EGFP | Ppp6c    | protein phosphatase 6, catalytic subunit              | Gensat |
| Tg(Prickle1-EGFP)QH59Gsat  | EGFP | Prickle1 | prickle homolog 1 (Drosophila)                        | Gensat |
| Tg(Prkcq-EGFP)IM145Gsat    | EGFP | Prkcq    | protein kinase C, theta                               | Gensat |
| Tg(Prmt2-EGFP)IL152Gsat    | EGFP | Prmt2    | protein arginine N-methyltransferase 2                | Gensat |
| Tg(Pmp-EGFP)JX28Gsat       | EGFP | Pmp      | prion protein                                         | Gensat |
| Tg(Prok2-EGFP)FH64Gsat     | EGFP | Prok2    | prokineticin 2                                        | Gensat |
| Tg(Prokr2-EGFP)JU78Gsat    | EGFP | Prokr2   | prokineticin receptor 2                               | Gensat |
| Tg(Prom1-EGFP)HV253Gsat    | EGFP | Prom1    | prominin 1                                            | Gensat |
| Tg(Prox1-EGFP)KY221Gsat    | EGFP | Prox1    | prospero-related homeobox 1                           | Gensat |
| Tg(Prph-EGFP)HN188Gsat     | EGFP | Prph     | peripherin                                            | Gensat |
| Tg(Prss12-EGFP)FI61Gsat    | EGFP | Prss12   | protease, serine, 12 neurotrypsin (motopsin)          | Gensat |
| Tg(Prtg-EGFP)HZ235Gsat     | EGFP | Prtg     | proteogenin homolog (Gallus gallus)                   | Gensat |
| Tg(Psen2-EGFP)DF244Gsat    | EGFP | Psen2    | presenilin 2                                          | Gensat |
| Tg(Ptch1-EGFP)EZ56Gsat     | EGFP | Ptch1    | patched homolog 1                                     | Gensat |
| Tg(Pten-EGFP)NE5Gsat       | EGFP | Pten     | phosphatase and tensin homolog                        | Gensat |
| Tg(Ptn-EGFP)HJ32Gsat       | EGFP | Ptn      | pleiotrophin                                          | Gensat |
| Tg(Ptpn3-EGFP)NX106Gsat    | EGFP | Ptpn3    | protein tyrosine phosphatase, non-receptor type 3     | Gensat |
| Tg(Ptpn5-EGFP)HN83Gsat     | EGFP | Ptpn5    | protein tyrosine phosphatase, non-receptor type 5     | Gensat |
| Tg(Ptprc-EGFP)JA52Gsat     | EGFP | Ptprc    | protein tyrosine phosphatase, receptor type, C        | Gensat |
| Tg(Ptprr-EGFP)GD171Gsat    | EGFP | Ptprr    | protein tyrosine phosphatase, receptor type, F        | Gensat |
| Tg(Ptprz1-EGFP)EN146Gsat   | EGFP | Ptprz1   | protein tyrosine phosphatase, receptor type Z, poly   | Gensat |
| Tg(Ptx3-EGFP)DO48Gsat      | EGFP | Ptx3     | pentraxin related gene                                | Gensat |
| Tg(Pus10-EGFP)JU62Gsat     | EGFP | Pus10    | pseudouridylate synthase 10                           | Gensat |
| Tg(Pvalb-EGFP)FE120Gsat    | EGFP | Pvalb    | parvalbumin                                           | Gensat |
| Tg(Pvrl3-EGFP)HP113Gsat    | EGFP | Pvrl3    | poliovirus receptor-related 3                         | Gensat |
| Tg(Pygb-EGFP)ER7Gsat       | EGFP | Pygb     | brain glycogen phosphorylase                          | Gensat |
| Tg(Rab37-EGFP)JP5Gsat      | EGFP | Rab37    | RAB37, member of RAS oncogene family                  | Gensat |
| Tg(Rab3b-EGFP)JK217Gsat    | EGFP | Rab3b    | RAB3B, member RAS oncogene family                     | Gensat |
| Tg(Rac1-EGFP)JZ33Gsat      | EGFP | Rac1     | RAS-related C3 botulinum substrate 1                  | Gensat |
| Tg(Rac3-EGFP)JZ58Gsat      | EGFP | Rac3     | RAS-related C3 botulinum substrate 3                  | Gensat |
| Tg(Ramp3-EGFP)HR106Gsat    | EGFP | Ramp3    | receptor (calcitonin) activity modifying protein 3    | Gensat |
| Tg(Rap1a-EGFP)IM69Gsat     | EGFP | Rap1a    | RAS-related protein-1a                                | Gensat |
| Tg(Rapgef3-EGFP)NF63Gsat   | EGFP | Rapgef3  | Rap guanine nucleotide exchange factor (GEF) 3        | Gensat |
| Tg(Rarb-EGFP)IT82Gsat      | EGFP | Rarb     | retinoic acid receptor, beta                          | Gensat |
| Tg(Rasa3-EGFP)LJ222Gsat    | EGFP | Rasa3    | RAS p21 protein activator 3                           | Gensat |
| Tg(Rasal1-EGFP)IH211Gsat   | EGFP | Rasal1   | RAS protein activator like 1 (GAP1 like)              | Gensat |
| Tg(Rasgef1b-EGFP)PX22Gsat  | EGFP | Rasgef1b | RasGEF domain family, member 1B                       | Gensat |
| Tg(Rasgrp1-EGFP)KX214Gsat  | EGFP | Rasgrp1  | RAS guanyl releasing protein 1                        | Gensat |
| Tg(Rasgrp2-EGFP)DU111Gsat  | EGFP | Rasgrp2  | RAS, guanyl releasing protein 2                       | Gensat |
| Tg(Rasl11b-EGFP)MG11Gsat   | EGFP | Rasl11b  | RAS-like, family 11, member B                         | Gensat |
| Tg(Rax-EGFP)JH25Gsat       | EGFP | Rax      | retina and anterior neural fold homeobox              | Gensat |
| Tg(Rbp1-EGFP)GX31Gsat      | EGFP | Rbp1     | retinol binding protein 1, cellular                   | Gensat |
| Tg(Rcan2-EGFP)EI79Gsat     | EGFP | Rcan2    | regulator of calcineurin 2                            | Gensat |
| Tg(Rcn1-EGFP)IC20Gsat      | EGFP | Rcn1     | reticulocalbin 1                                      | Gensat |
| Tg(Rell1-EGFP)KH57Gsat     | EGFP | Rell1    | REL1-like 1                                           | Gensat |
| Tg(Rerg-EGFP)NW35Gsat      | EGFP | Rerg     | RAS-like, estrogen-regulated, growth-inhibitor        | Gensat |
| Tg(Resp18-EGFP)FT127Gsat   | EGFP | Resp18   | regulated endocrine-specific protein 18               | Gensat |



|                             |      |           |                                                         |        |
|-----------------------------|------|-----------|---------------------------------------------------------|--------|
| Tg(Rest-EGFP)DG302Gsat      | EGFP | Rest      | RE1-silencing transcription factor                      | Gensat |
| Tg(Rfng-EGFP)IC128Gsat      | EGFP | Rfng      | RFNG O-fucosylpeptide 3-beta-N-acetylglucosamin         | Gensat |
| Tg(Rgs12-EGFP)HW332Gsat     | EGFP | Rgs12     | regulator of G-protein signaling 12                     | Gensat |
| Tg(Rgs16-EGFP)EJ41Gsat      | EGFP | Rgs16     | regulator of G-protein signaling 16                     | Gensat |
| Tg(Rgs2-EGFP)KU24Gsat       | EGFP | Rgs2      | regulator of G-protein signaling 2                      | Gensat |
| Tg(Rgs3-EGFP)GE19Gsat       | EGFP | Rgs3      | regulator of G-protein signaling 3                      | Gensat |
| Tg(Rgs4-EGFP)HS100Gsat      | EGFP | Rgs4      | regulator of G-protein signaling 4                      | Gensat |
| Tg(Rgs5-EGFP)JM24Gsat       | EGFP | Rgs5      | regulator of G-protein signaling 5                      | Gensat |
| Tg(Rgs8-EGFP)CB132Gsat      | EGFP | Rgs8      | regulator of G-protein signaling 8                      | Gensat |
| Tg(Rgs9-EGFP)BL74Gsat       | EGFP | Rgs9      | regulator of G-protein signaling 9                      | Gensat |
| Tg(Rhoa-EGFP)MZ80Gsat       | EGFP | Rhoa      | ras homolog gene family, member A                       | Gensat |
| Tg(Rhob-EGFP)NG172Gsat      | EGFP | Rhob      | ras homolog gene family, member B                       | Gensat |
| Tg(Rhou-EGFP)HN21Gsat       | EGFP | Rhou      | ras homolog gene family, member U                       | Gensat |
| Tg(Rif1-EGFP)KC17Gsat       | EGFP | Rif1      | Rap1 interacting factor 1 homolog (yeast)               | Gensat |
| Tg(Rlbp1-EGFP)LC531Gsat     | EGFP | Rlbp1     | retinaldehyde binding protein 1                         | Gensat |
| Tg(Rnd1-EGFP)FZ1Gsat        | EGFP | Rnd1      | Rho family GTPase 1                                     | Gensat |
| Tg(Rnd2-EGFP)JL99Gsat       | EGFP | Rnd2      | Rho family GTPase 2                                     | Gensat |
| Tg(Rnd3-EGFP)ED142Gsat      | EGFP | Rnd3      | Rho family GTPase 3                                     | Gensat |
| Tg(Rph3a-EGFP)KR703Gsat     | EGFP | Rph3a     | rabphilin 3A                                            | Gensat |
| Tg(Rpl18-EGFP)KC65Gsat      | EGFP | Rpl18     | ribosomal protein L18                                   | Gensat |
| Tg(Rpl31-EGFP)LA244Gsat     | EGFP | Rpl31     | ribosomal protein L31                                   | Gensat |
| Tg(Rprm-EGFP)JC60Gsat       | EGFP | Rprm      | reprimin, TP53 dependent G2 arrest mediator candi       | Gensat |
| Tg(Rps25-EGFP)GB335Gsat     | EGFP | Rps25     | ribosomal protein S25                                   | Gensat |
| Tg(Rps7-EGFP)IA288Gsat      | EGFP | Rps7      | ribosomal protein S7                                    | Gensat |
| Tg(Rraga-EGFP)HR49Gsat      | EGFP | Rraga     | Ras-related GTP binding A                               | Gensat |
| Tg(Rspo3-EGFP)OH59Gsat      | EGFP | Rspo3     | R-spondin 3 homolog (Xenopus laevis)                    | Gensat |
| Tg(Rtn4-EGFP)LW4Gsat        | EGFP | Rtn4      | reticulon 4                                             | Gensat |
| Tg(Rtn4r1-EGFP)DU60Gsat     | EGFP | Rtn4r1    | reticulon 4 receptor-like 1                             | Gensat |
| Tg(Runx1-EGFP)EI184Gsat     | EGFP | Runx1     | runt related transcription factor 1                     | Gensat |
| Tg(Rxfp3-EGFP)IL70Gsat      | EGFP | Rxfp3     | relaxin family peptide receptor 3                       | Gensat |
| Tg(S100a10-EGFP)HC85Gsat    | EGFP | S100a10   | S100 calcium binding protein A10 (calpactin)            | Gensat |
| Tg(Satb2-EGFP)HQ127Gsat     | EGFP | Satb2     | special AT-rich sequence binding protein 2              | Gensat |
| Tg(Scg3-EGFP)FM142Gsat      | EGFP | Scg3      | secretogranin III                                       | Gensat |
| Tg(Scube1-EGFP)K89Gsat      | EGFP | Scube1    | signal peptide, CUB domain, EGF-like 1                  | Gensat |
| Tg(Scube2-EGFP)G204Gsat     | EGFP | Scube2    | signal peptide, CUB domain, EGF-like 2                  | Gensat |
| Tg(Sdc3-EGFP)NC124Gsat      | EGFP | Sdc3      | syndecan 3                                              | Gensat |
| Tg(Sdha-EGFP)LU59Gsat       | EGFP | Sdha      | succinate dehydrogenase complex, subunit A, flavo       | Gensat |
| Tg(Selm-EGFP)NE35Gsat       | EGFP | Selm      | selenoprotein M                                         | Gensat |
| Tg(Sema3b-EGFP)S52Gsat      | EGFP | Sema3b    | sema domain, immunoglobulin domain (Ig), short b;       | Gensat |
| Tg(Sema3e-EGFP)AY35Gsat     | EGFP | Sema3e    | sema domain, immunoglobulin domain (Ig), short b;       | Gensat |
| Tg(Sema3f-EGFP)JN103Gsat    | EGFP | Sema3f    | sema domain, immunoglobulin domain (Ig), short b;       | Gensat |
| Tg(Sema6d-EGFP)EW185Gsat    | EGFP | Sema6d    | sema domain, transmembrane domain (TM), and c;          | Gensat |
| Tg(Sema7a-EGFP)AZ164Gsat    | EGFP | Sema7a    | sema domain, immunoglobulin domain (Ig), and GF         | Gensat |
| Tg(Sept3-EGFP)DL55Gsat      | EGFP | Sept3     | septin 3                                                | Gensat |
| Tg(Sept4-EGFP)AK193Gsat     | EGFP | Sept4     | septin 4                                                | Gensat |
| Tg(Sept6-EGFP)FH52Gsat      | EGFP | Sept6     | septin 6                                                | Gensat |
| Tg(Serf1-EGFP)HF12Gsat      | EGFP | Serf1     | small EDRK-rich factor 1                                | Gensat |
| Tg(Serpina3c-EGFP)JX27Gsat  | EGFP | Serpina3c | serine (or cysteine) peptidase inhibitor, clade A, me   | Gensat |
| Tg(Serpina9-EGFP)JG5Gsat    | EGFP | Serpina9  | serine (or cysteine) peptidase inhibitor, clade A (alp) | Gensat |
| Tg(Serpina6a-EGFP)MA267Gsat | EGFP | Serpina6a | serine (or cysteine) peptidase inhibitor, clade B, me   | Gensat |
| Tg(Serpin1-EGFP)HT101Gsat   | EGFP | Serpin1   | serine (or cysteine) peptidase inhibitor, clade I, men  | Gensat |
| Tg(Sertad4-EGFP)PZ79Gsat    | EGFP | Sertad4   | SERTA domain containing 4                               | Gensat |
| Tg(Sez6-EGFP)EF110Gsat      | EGFP | Sez6      | seizure related gene 6                                  | Gensat |
| Tg(Sez6l2-EGFP)IC208Gsat    | EGFP | Sez6l2    | seizure related 6 homolog like 2                        | Gensat |
| Tg(Sf1-EGFP)CU100Gsat       | EGFP | Sf1       | splicing factor 1                                       | Gensat |
| Tg(Sfrp1-EGFP)DH142Gsat     | EGFP | Sfrp1     | secreted frizzled-related protein 1                     | Gensat |
| Tg(Sfrp2-EGFP)LE120Gsat     | EGFP | Sfrp2     | secreted frizzled-related protein 2                     | Gensat |
| Tg(Sfrp4-EGFP)H259Gsat      | EGFP | Sfrp4     | secreted frizzled-related protein 4                     | Gensat |
| Tg(Sfrp5-EGFP)KJ119Gsat     | EGFP | Sfrp5     | secreted frizzled-related sequence protein 5            | Gensat |
| Tg(Sh3bgrl2-EGFP)QY129Gsat  | EGFP | Sh3bgrl2  | SH3 domain binding glutamic acid-rich protein like 2    | Gensat |
| Tg(Sh3bgrl3-EGFP)LU321Gsat  | EGFP | Sh3bgrl3  | SH3 domain binding glutamic acid-rich protein-like 3    | Gensat |
| Tg(Shf-EGFP)QT55Gsat        | EGFP | Shf       | Src homology 2 domain containing F                      | Gensat |
| Tg(Shh-EGFP)BF167Gsat       | EGFP | Shh       | sonic hedgehog                                          | Gensat |
| Tg(Sim1-EGFP)AX55Gsat       | EGFP | Sim1      | single-minded homolog 1 (Drosophila)                    | Gensat |
| Tg(Sirt2-EGFP)GK6Gsat       | EGFP | Sirt2     | sirtuin 2 (silent mating type information regulation 2  | Gensat |
| Tg(Six3-EGFP)OF35Gsat       | EGFP | Six3      | sine oculis-related homeobox 3 homolog (Drosophil       | Gensat |
| Tg(Six6-EGFP)IF290Gsat      | EGFP | Six6      | sine oculis-related homeobox 6 homolog (Drosophil       | Gensat |
| Tg(Skil-EGFP)HZ44Gsat       | EGFP | Skil      | SKI-like                                                | Gensat |
| Tg(Skor1-EGFP)NI66Gsat      | EGFP | Skor1     | SKI family transcriptional corepressor 1                | Gensat |
| Tg(Skor2-EGFP)PX78Gsat      | EGFP | Skor2     | SKI family transcriptional corepressor 2                | Gensat |
| Tg(Sla-EGFP)HU63Gsat        | EGFP | Sla       | src-like adaptor                                        | Gensat |
| Tg(Slc10a4-EGFP)JX24Gsat    | EGFP | Slc10a4   | solute carrier family 10 (sodium/bile acid cotranspor   | Gensat |
| Tg(Slc12a5-EGFP)DJ234Gsat   | EGFP | Slc12a5   | solute carrier family 12, member 5                      | Gensat |
| Tg(Slc17a6-EGFP)FY115Gsat   | EGFP | Slc17a6   | solute carrier family 17 (sodium-dependent inorgani     | Gensat |

|                            |      |          |                                                                            |
|----------------------------|------|----------|----------------------------------------------------------------------------|
| Tg(Slc17a7-EGFP)HU9Gsat    | EGFP | Slc17a7  | solute carrier family 17 (sodium-dependent inorganic anion carrier)        |
| Tg(Slc17a8-EGFP)LM32Gsat   | EGFP | Slc17a8  | solute carrier family 17 (sodium-dependent inorganic anion carrier)        |
| Tg(Slc18a2-EGFP)IC5Gsat    | EGFP | Slc18a2  | solute carrier family 18 (vesicular monoamine), member 2                   |
| Tg(Slc18a3-EGFP)KB14Gsat   | EGFP | Slc18a3  | solute carrier family 18 (vesicular monoamine), member 3                   |
| Tg(Slc1a2-EGFP)DR60Gsat    | EGFP | Slc1a2   | solute carrier family 1 (glial high affinity glutamate transporter)        |
| Tg(Slc1a6-EGFP)HD185Gsat   | EGFP | Slc1a6   | solute carrier family 1 (high affinity aspartate/glutamate transporter)    |
| Tg(Slc22a3-EGFP)JZ6Gsat    | EGFP | Slc22a3  | solute carrier family 22 (organic cation transporter), member 3            |
| Tg(Slc25a12-EGFP)GF178Gsat | EGFP | Slc25a12 | solute carrier family 25 (mitochondrial carrier, Aralar1)                  |
| Tg(Slc25a22-EGFP)LI123Gsat | EGFP | Slc25a22 | solute carrier family 25 (mitochondrial carrier, glutaraldehyde inducible) |
| Tg(Slc29a1-EGFP)GW127Gsat  | EGFP | Slc29a1  | solute carrier family 29 (nucleoside transporters), member 1               |
| Tg(Slc32a1-EGFP)EN128Gsat  | EGFP | Slc32a1  | solute carrier family 32 (GABA vesicular transporter)                      |
| Tg(Slc33a1-EGFP)GQ136Gsat  | EGFP | Slc33a1  | solute carrier family 33 (acetyl-CoA transporter), member 1                |
| Tg(Slc39a6-EGFP)QE75Gsat   | EGFP | Slc39a6  | solute carrier family 39 (metal ion transporter), member 6                 |
| Tg(Slc41a3-EGFP)HQ259Gsat  | EGFP | Slc41a3  | solute carrier family 41, member 3                                         |
| Tg(Slc4a2-EGFP)HQ88Gsat    | EGFP | Slc4a2   | solute carrier family 4 (anion exchanger), member 2                        |
| Tg(Slc6a2-EGFP)DW31Gsat    | EGFP | Slc6a2   | solute carrier family 6 (neurotransmitter transporter), member 2           |
| Tg(Slc6a2-EGFP)DO248Gsat   | EGFP | Slc6a2   | solute carrier family 6 (neurotransmitter transporter), member 2           |
| Tg(Slc6a3-EGFP)JN119Gsat   | EGFP | Slc6a3   | solute carrier family 6 (neurotransmitter transporter), member 3           |
| Tg(Slc6a4-EGFP)JP55Gsat    | EGFP | Slc6a4   | solute carrier family 6 (neurotransmitter transporter), member 4           |
| Tg(Slc6a5-EGFP)DP199Gsat   | EGFP | Slc6a5   | solute carrier family 6 (neurotransmitter transporter), member 5           |
| Tg(Slc6a6-EGFP)DO284Gsat   | EGFP | Slc6a6   | solute carrier family 6 (neurotransmitter transporter), member 6           |
| Tg(Slc8a2-EGFP)HZ185Gsat   | EGFP | Slc8a2   | solute carrier family 8 (sodium/calcium exchanger), member 2               |
| Tg(Slc9a3r1-EGFP)GQ399Gsat | EGFP | Slc9a3r1 | solute carrier family 9 (sodium/hydrogen exchanger), member 1              |
| Tg(Slit1-EGFP)GB63Gsat     | EGFP | Slit1    | slit homolog 1 (Drosophila)                                                |
| Tg(Slitrk3-EGFP)KN149Gsat  | EGFP | Slitrk3  | SLIT and NTRK-like family, member 3                                        |
| Tg(Slitrk5-EGFP)HV292Gsat  | EGFP | Slitrk5  | SLIT and NTRK-like family, member 5                                        |
| Tg(Slitrk6-EGFP)HX16Gsat   | EGFP | Slitrk6  | SLIT and NTRK-like family, member 6                                        |
| Tg(Smarce1-EGFP)HQ319Gsat  | EGFP | Smarce1  | SWI/SNF related, matrix associated, actin dependent nuclear corepressor 1  |
| Tg(Smoc2-EGFP)HY194Gsat    | EGFP | Smoc2    | SPARC related modular calcium binding domain containing protein 2          |
| Tg(Smpd3-EGFP)NZ13Gsat     | EGFP | Smpd3    | sphingomyelin phosphodiesterase 3, neutral                                 |
| Tg(Snap25-EGFP)DQ103Gsat   | EGFP | Snap25   | synaptosomal-associated protein 25                                         |
| Tg(Snap91-EGFP)JH371Gsat   | EGFP | Snap91   | synaptosomal-associated protein 91                                         |
| Tg(Snca-EGFP)PD20Gsat      | EGFP | Snca     | synuclein, alpha                                                           |
| Tg(Snx17-EGFP)FN96Gsat     | EGFP | Snx17    | sorting nexin 17                                                           |
| Tg(Sort1-EGFP)EB71Gsat     | EGFP | Sort1    | sortilin 1                                                                 |
| Tg(Sox10-EGFP)GE255Gsat    | EGFP | Sox10    | SRY-box containing gene 10                                                 |
| Tg(Sox11-EGFP)IC111Gsat    | EGFP | Sox11    | SRY-box containing gene 11                                                 |
| Tg(Sox14-EGFP)HN1Gsat      | EGFP | Sox14    | SRY-box containing gene 14                                                 |
| Tg(Sox2-EGFP)KR38Gsat      | EGFP | Sox2     | SRY-box containing gene 2                                                  |
| Tg(Sox3-EGFP)MT59Gsat      | EGFP | Sox3     | SRY-box containing gene 3                                                  |
| Tg(Sox4-EGFP)HW173Gsat     | EGFP | Sox4     | SRY-box containing gene 4                                                  |
| Tg(Sox8-EGFP)LY179Gsat     | EGFP | Sox8     | SRY-box containing gene 8                                                  |
| Tg(Sox9-EGFP)EB209Gsat     | EGFP | Sox9     | SRY-box containing gene 9                                                  |
| Tg(Sp4-EGFP)CP195Gsat      | EGFP | Sp4      | trans-acting transcription factor 4                                        |
| Tg(Sp8-EGFP)OC9Gsat        | EGFP | Sp8      | trans-acting transcription factor 8                                        |
| Tg(Sparcl1-EGFP)BE2Gsat    | EGFP | Sparcl1  | SPARC-like 1                                                               |
| Tg(Spint2-EGFP)QB34Gsat    | EGFP | Spint2   | serine protease inhibitor, Kunitz type 2                                   |
| Tg(Spna2-EGFP)JK12Gsat     | EGFP | Spna2    | spectrin alpha 2                                                           |
| Tg(Spp1-EGFP)PD43Gsat      | EGFP | Spp1     | secreted phosphoprotein 1                                                  |
| Tg(Sprn-EGFP)HX177Gsat     | EGFP | Sprn     | shadow of prion protein                                                    |
| Tg(Spry1-EGFP)LC231Gsat    | EGFP | Spry1    | sprouty homolog 1 (Drosophila)                                             |
| Tg(Spry3-EGFP)MR74Gsat     | EGFP | Spry3    | sprouty homolog 3 (Drosophila)                                             |
| Tg(Sqle-EGFP)IM104Gsat     | EGFP | Sqle     | squalene epoxidase                                                         |
| Tg(Srr-EGFP)KJ355Gsat      | EGFP | Srr      | serine racemase                                                            |
| Tg(Srsf5-EGFP)LR133Gsat    | EGFP | Srsf5    | serine/arginine-rich splicing factor 5                                     |
| Tg(Srsf7-EGFP)IL254Gsat    | EGFP | Srsf7    | serine/arginine-rich splicing factor 7                                     |
| Tg(Sstr2-EGFP)DI119Gsat    | EGFP | Sstr2    | somatostatin receptor 2                                                    |
| Tg(ST3gal1-EGFP)PF42Gsat   | EGFP | ST3gal1  | ST3 beta-galactoside alpha-2,3-sialyltransferase 1                         |
| Tg(ST8sia5-EGFP)MC10Gsat   | EGFP | ST8sia5  | ST8 alpha-N-acetylneuraminidase alpha-2,8-sialyltransferase                |
| Tg(Stard5-EGFP)IS65Gsat    | EGFP | Stard5   | STAR-related lipid transfer (START) domain containing protein 5            |
| Tg(Stau1-EGFP)IF119Gsat    | EGFP | Stau1    | staufen (RNA binding protein) homolog 1 (Drosophila)                       |
| Tg(Steap2-EGFP)MC48Gsat    | EGFP | Steap2   | six transmembrane epithelial antigen of prostate 2                         |
| Tg(Stmn1-EGFP)HX248Gsat    | EGFP | Stmn1    | stathmin 1                                                                 |
| Tg(Stmn2-EGFP)NY75Gsat     | EGFP | Stmn2    | stathmin-like 2                                                            |
| Tg(Strn-EGFP)FQ364Gsat     | EGFP | Strn     | striatin, calmodulin binding protein                                       |
| Tg(Stx1a-EGFP)FV144Gsat    | EGFP | Stx1a    | syntaxin 1A (brain)                                                        |
| Tg(Sucnr1-EGFP)LD94Gsat    | EGFP | Sucnr1   | succinate receptor 1                                                       |
| Tg(Sufu-EGFP)DK37Gsat      | EGFP | Sufu     | suppressor of fused homolog (Drosophila)                                   |
| Tg(Sulf2-EGFP)HQ3Gsat      | EGFP | Sulf2    | sulfatase 2                                                                |
| Tg(Sult1a1-EGFP)LB282Gsat  | EGFP | Sult1a1  | sulfotransferase family 1A, phenol-preferring, member 1                    |
| Tg(Sun2-EGFP)KP55Gsat      | EGFP | Sun2     | Sad1 and UNC84 domain containing 2                                         |
| Tg(Susd2-EGFP)NT201Gsat    | EGFP | Susd2    | sushi domain containing 2                                                  |
| Tg(Sv2a-EGFP)JS31Gsat      | EGFP | Sv2a     | synaptic vesicle glycoprotein 2 a                                          |
| Tg(Syng3-EGFP)CQ171Gsat    | EGFP | Syng3    | synaptogyrin 3                                                             |

|                           |      |         |                                                       |        |
|---------------------------|------|---------|-------------------------------------------------------|--------|
| Tg(Synj2-EGFP)HQ162Gsat   | EGFP | Synj2   | synaptojanin 2                                        | Gensat |
| Tg(Syt13-EGFP)KA20Gsat    | EGFP | Syt13   | synaptotagmin XIII                                    | Gensat |
| Tg(Syt17-EGFP)JI32Gsat    | EGFP | Syt17   | synaptotagmin XVII                                    | Gensat |
| Tg(Syt2-EGFP)MT17Gsat     | EGFP | Syt2    | synaptotagmin II                                      | Gensat |
| Tg(Syt3-EGFP)HT62Gsat     | EGFP | Syt3    | synaptotagmin III                                     | Gensat |
| Tg(Syt4-EGFP)GN299Gsat    | EGFP | Syt4    | synaptotagmin IV                                      | Gensat |
| Tg(Syt6-EGFP)EL71Gsat     | EGFP | Syt6    | synaptotagmin VI                                      | Gensat |
| Tg(Syt7-EGFP)HM197Gsat    | EGFP | Syt7    | synaptotagmin VII                                     | Gensat |
| Tg(Tac2-EGFP)HF381Gsat    | EGFP | Tac2    | tachykinin 2                                          | Gensat |
| Tg(Tacr3-EGFP)JM102Gsat   | EGFP | Tacr3   | tachykinin receptor 3                                 | Gensat |
| Tg(Taf13-EGFP)HR261Gsat   | EGFP | Taf13   | TAF13 RNA polymerase II, TATA box binding protei      | Gensat |
| Tg(Tagln3-EGFP)EG97Gsat   | EGFP | Tagln3  | transgelin 3                                          | Gensat |
| Tg(Tbc1d8-EGFP)IB6Gsat    | EGFP | Tbc1d8  | TBC1 domain family, member 8                          | Gensat |
| Tg(Tcf3-EGFP)HK84Gsat     | EGFP | Tcf3    | transcription factor 3                                | Gensat |
| Tg(Tdo2-EGFP)QE60Gsat     | EGFP | Tdo2    | tryptophan 2,3-dioxygenase                            | Gensat |
| Tg(Tcfap2b-EGFP)DZ170Gsat | EGFP | Tfap2b  | transcription factor AP-2 beta                        | Gensat |
| Tg(Tfg-EGFP)H44Gsat       | EGFP | Tfg     | Trk-fused gene                                        | Gensat |
| Tg(Tgfb3-EGFP)NG133Gsat   | EGFP | Tgfb3   | transforming growth factor, beta 3                    | Gensat |
| Tg(Tgif1-EGFP)IS21Gsat    | EGFP | Tgif1   | TGFB-induced factor homeobox 1                        | Gensat |
| Tg(Th-EGFP)DJ76Gsat       | EGFP | Th      | tyrosine hydroxylase                                  | Gensat |
| Tg(Thbs1-EGFP)GP396Gsat   | EGFP | Thbs1   | thrombospondin 1                                      | Gensat |
| Tg(Thbs3-EGFP)FB164Gsat   | EGFP | Thbs3   | thrombospondin 3                                      | Gensat |
| Tg(Thbs4-EGFP)FA248Gsat   | EGFP | Thbs4   | thrombospondin 4                                      | Gensat |
| Tg(Thra-EGFP)KL340Gsat    | EGFP | Thra    | thyroid hormone receptor alpha                        | Gensat |
| Tg(Thrsp-EGFP)HS276Gsat   | EGFP | Thrsp   | thyroid hormone responsive SPOT14 homolog (Rat        | Gensat |
| Tg(Timp2-EGFP)KR651Gsat   | EGFP | Timp2   | tissue inhibitor of metalloproteinase 2               | Gensat |
| Tg(Tle1-EGFP)IC137Gsat    | EGFP | Tle1    | transducin-like enhancer of split 1, homolog of Dros  | Gensat |
| Tg(Tle3-EGFP)LU125Gsat    | EGFP | Tle3    | transducin-like enhancer of split 3, homolog of Dros  | Gensat |
| Tg(Tlx3-EGFP)DL144Gsat    | EGFP | Tlx3    | T-cell leukemia, homeobox 3                           | Gensat |
| Tg(Tmeff1-EGFP)KD132Gsat  | EGFP | Tmeff1  | transmembrane protein with EGF-like and two follis    | Gensat |
| Tg(Tmem35-EGFP)IJ223Gsat  | EGFP | Tmem35  | transmembrane protein 35                              | Gensat |
| Tg(Tmem59l-EGFP)FC259Gsat | EGFP | Tmem59l | transmembrane protein 59-like                         | Gensat |
| Tg(Tmem90a-EGFP)LE39Gsat  | EGFP | Tmem90a | transmembrane protein 90a                             | Gensat |
| Tg(Tnc-EGFP)KZ30Gsat      | EGFP | Tnc     | tenascin C                                            | Gensat |
| Tg(Tnip2-EGFP)NC165Gsat   | EGFP | Tnip2   | TNFAIP3 interacting protein 2                         | Gensat |
| Tg(Tor1b-EGFP)IK176Gsat   | EGFP | Tor1b   | torin family 1, member B                              | Gensat |
| Tg(Tpbg-EGFP)NJ116Gsat    | EGFP | Tpbg    | trophoblast glycoprotein                              | Gensat |
| Tg(Tpd52l1-EGFP)LT20Gsat  | EGFP | Tpd52l1 | tumor protein D52-like 1                              | Gensat |
| Tg(Tph2-EGFP)LO210Gsat    | EGFP | Tph2    | tryptophan hydroxylase 2                              | Gensat |
| Tg(Tppp3-EGFP)HF251Gsat   | EGFP | Tppp3   | tubulin polymerization-promoting protein family mer   | Gensat |
| Tg(Traf4-EGFP)KR254Gsat   | EGFP | Traf4   | TNF receptor associated factor 4                      | Gensat |
| Tg(Trappc3-EGFP)LR1Gsat   | EGFP | Trappc3 | trafficking protein particle complex 3                | Gensat |
| Tg(Trf-EGFP)JF181Gsat     | EGFP | Trf     | transferrin                                           | Gensat |
| Tg(Trh-EGFP)FZ169Gsat     | EGFP | Trh     | thyrotropin releasing hormone                         | Gensat |
| Tg(Trhr-EGFP)HU193Gsat    | EGFP | Trhr    | thyrotropin releasing hormone receptor                | Gensat |
| Tg(Trib2-EGFP)CU83Gsat    | EGFP | Trib2   | tribbles homolog 2 (Drosophila)                       | Gensat |
| Tg(Trim2-EGFP)IO71Gsat    | EGFP | Trim2   | tripartite motif-containing 2                         | Gensat |
| Tg(Trmp1-EGFP)PU26Gsat    | EGFP | Trmp1   | TMF1-regulated nuclear protein 1                      | Gensat |
| Tg(Trpa1-EGFP)LT325Gsat   | EGFP | Trpa1   | transient receptor potential cation channel, subfamii | Gensat |
| Tg(Trpv1-EGFP)MA208Gsat   | EGFP | Trpv1   | transient receptor potential cation channel, subfamii | Gensat |
| Tg(Trpv4-EGFP)MT43Gsat    | EGFP | Trpv4   | transient receptor potential cation channel, subfamii | Gensat |
| Tg(Tspan14-EGFP)IB44Gsat  | EGFP | Tspan14 | tetraspanin 14                                        | Gensat |
| Tg(Ttr-EGFP)NE84Gsat      | EGFP | Ttr     | transthyretin                                         | Gensat |
| Tg(Ttyh1-EGFP)OB49Gsat    | EGFP | Ttyh1   | twenty homolog 1 (Drosophila)                         | Gensat |
| Tg(Tuba1b-EGFP)KO103Gsat  | EGFP | Tuba1b  | tubulin, alpha 1B                                     | Gensat |
| Tg(Tubb3-EGFP)IB13Gsat    | EGFP | Tubb3   | tubulin, beta 3 class III                             | Gensat |
| Tg(Tubb4-EGFP)KR607Gsat   | EGFP | Tubb4a  | tubulin, beta 4A class IVA                            | Gensat |
| Tg(Tubb2c-EGFP)LB59Gsat   | EGFP | Tubb4b  | tubulin, beta 4B class IVB                            | Gensat |
| Tg(Ube2n-EGFP)LW45Gsat    | EGFP | Ube2n   | ubiquitin-conjugating enzyme E2N                      | Gensat |
| Tg(Ubn2-EGFP)DO120Gsat    | EGFP | Ubn2    | ubiquitin 2                                           | Gensat |
| Tg(Ubxn11-EGFP)JF100Gsat  | EGFP | Ubxn11  | UBX domain protein 11                                 | Gensat |
| Tg(Ucn3-EGFP)HY36Gsat     | EGFP | Ucn3    | urocortin 3                                           | Gensat |
| Tg(Ucp2-EGFP)GK229Gsat    | EGFP | Ucp2    | uncoupling protein 2 (mitochondrial, proton carrier)  | Gensat |
| Tg(Uhmk1-EGFP)HX301Gsat   | EGFP | Uhmk1   | U2AF homology motif (UHM) kinase 1                    | Gensat |
| Tg(Uncx-EGFP)JH72Gsat     | EGFP | Uncx    | UNC homeobox                                          | Gensat |
| Tg(Uso1-EGFP)EO231Gsat    | EGFP | Uso1    | USO1 homolog, vesicle docking protein (yeast)         | Gensat |
| Tg(Vamp2-EGFP)LO335Gsat   | EGFP | Vamp2   | vesicle-associated membrane protein 2                 | Gensat |
| Tg(Vat1-EGFP)NU129Gsat    | EGFP | Vat1    | vesicle amine transport protein 1 homolog (T califor  | Gensat |
| Tg(Vcan-EGFP)EU15Gsat     | EGFP | Vcan    | versican                                              | Gensat |
| Tg(Vdac1-EGFP)JF127Gsat   | EGFP | Vdac1   | voltage-dependent anion channel 1                     | Gensat |
| Tg(Vdac2-EGFP)JO20Gsat    | EGFP | Vdac2   | voltage-dependent anion channel 2                     | Gensat |
| Tg(Vegfa-EGFP)KR374Gsat   | EGFP | Vegfa   | vascular endothelial growth factor A                  | Gensat |
| Tg(Vim-EGFP)GM158Gsat     | EGFP | Vim     | vimentin                                              | Gensat |
| Tg(Vip-EGFP)JN37Gsat      | EGFP | Vip     | vasoactive intestinal polypeptide                     | Gensat |

|                           |      |          |                                                |        |
|---------------------------|------|----------|------------------------------------------------|--------|
| Tg(Vipr2-EGFP)HR133Gsat   | EGFP | Vipr2    | vasoactive intestinal peptide receptor 2       | Gensat |
| Tg(Vldlr-EGFP)EP209Gsat   | EGFP | Vldlr    | very low density lipoprotein receptor          | Gensat |
| Tg(Vmn1r206-EGFP)PI35Gsat | EGFP | Vmn1r206 | vomeronasal 1 receptor 206                     | Gensat |
| Tg(Vsn11-EGFP)HT4Gsat     | EGFP | Vsn11    | visinin-like 1                                 | Gensat |
| Tg(Vsx2-EGFP)FJ99Gsat     | EGFP | Vsx2     | visual system homeobox 2                       | Gensat |
| Tg(Wasf1-EGFP)JE69Gsat    | EGFP | Wasf1    | WASP family 1                                  | Gensat |
| Tg(Wfs1-EGFP)J128Gsat     | EGFP | Wfs1     | Wolfram syndrome 1 homolog (human)             | Gensat |
| Tg(Wif1-EGFP)OB82Gsat     | EGFP | Wif1     | Wnt inhibitory factor 1                        | Gensat |
| Tg(Wnt2b-EGFP)JZ94Gsat    | EGFP | Wnt2b    | wingless related MMTV integration site 2b      | Gensat |
| Tg(Wnt3-EGFP)KM111Gsat    | EGFP | Wnt3     | wingless-related MMTV integration site 3       | Gensat |
| Tg(Wnt5b-EGFP)CR156Gsat   | EGFP | Wnt5b    | wingless-related MMTV integration site 5B      | Gensat |
| Tg(Wnt7a-EGFP)GZ7Gsat     | EGFP | Wnt7a    | wingless-related MMTV integration site 7A      | Gensat |
| Tg(Wnt8b-EGFP)MK68Gsat    | EGFP | Wnt8b    | wingless related MMTV integration site 8b      | Gensat |
| Tg(Wscd1-EGFP)OC82Gsat    | EGFP | Wscd1    | WSC domain containing 1                        | Gensat |
| Tg(Wwc1-EGFP)OJ47Gsat     | EGFP | Wwc1     | WW, C2 and coiled-coil domain containing 1     | Gensat |
| Tg(Xpo4-EGFP)JD181Gsat    | EGFP | Xpo4     | exportin 4                                     | Gensat |
| Tg(Ypel4-EGFP)FP230Gsat   | EGFP | Ypel4    | yippee-like 4 (Drosophila)                     | Gensat |
| Tg(Ywhah-EGFP)GZ100Gsat   | EGFP | Ywhah    | tyrosine 3-monooxygenase/tryptophan 5-monooxyg | Gensat |
| Tg(Zbtb20-EGFP)HZ275Gsat  | EGFP | Zbtb20   | zinc finger and BTB domain containing 20       | Gensat |
| Tg(Zcchc12-EGFP)NW229Gsat | EGFP | Zcchc12  | zinc finger, CCHC domain containing 12         | Gensat |
| Tg(Zfp238-EGFP)LW144Gsat  | EGFP | Zfp238   | zinc finger protein 238                        | Gensat |
| Tg(Zfp532-EGFP)IG45Gsat   | EGFP | Zfp532   | zinc finger protein 532                        | Gensat |
| Tg(Zic1-EGFP)GH81Gsat     | EGFP | Zic1     | zinc finger protein of the cerebellum 1        | Gensat |
| Tg(Zic2-EGFP)HT146Gsat    | EGFP | Zic2     | zinc finger protein of the cerebellum 2        | Gensat |
| Tg(Zic3-EGFP)KM21Gsat     | EGFP | Zic3     | zinc finger protein of the cerebellum 3        | Gensat |
| Tg(Zic5-EGFP)OA66Gsat     | EGFP | Zic5     | zinc finger protein of the cerebellum 5        | Gensat |
| Tg(Zwint-EGFP)HU145Gsat   | EGFP | Zwint    | ZW10 interactor                                | Gensat |
